# Supplementary material
Source: PubMed Central journal article supplement (PMC4278941)
Supplement: NIHMS604833-supplement-NAA10--supplemental_figures.pdf [file NIHMS604833-supplement-NAA10--supplemental_figures.pdf]

| Category                                              | Functions Annotation      | p-Value  | Molecules                                                                                                                                                                                                                                                                                                                                                                                                                                                                                                                             | # Molecules |
|-------------------------------------------------------|---------------------------|----------|---------------------------------------------------------------------------------------------------------------------------------------------------------------------------------------------------------------------------------------------------------------------------------------------------------------------------------------------------------------------------------------------------------------------------------------------------------------------------------------------------------------------------------------|-------------|
| Tissue Development                                    | tissue development        | 3.74E-07 | ADM, AGTR1, ALDH1A1, ANGPTL4, ARHGAP35, ARSE, ATF7, BCOR, C10orf58, COL12A1, COL8A1, CXCL14, DLL4, EMP1, EN1, EYA1, F2RL1, FBN1, FCGR2B, FIG4, FOXF1, FOXF2, FOXQ1, FZD1, GAL, HMGA2, HOXA13, HOXB2, HOXB3, HOXC4, HOXC8, HSD17B2, HSPG2, IL11RA, INSIG2, INSR, ISL1, LAMA3, LAMB2, LRP4, MEOX2, MITF, MSX1, MYCBP2, NCAM1, NRN1, ODC1, OPHN1, PAPP, PITX1, PLAU, POSTN, PRKAR2B, PTCH2, PTN, RBL2 (includes EG:100331892), SATB2, SGCD, SHROOM4, SIX2, SPAG4, STRA6, STRBP, SYNE1, TBX19, TBX4, TET2, TOB2, TRPC6, WNT2, XIRP1, ZEB2 | 72          |
| Embryonic Development                                 | organogenesis             | 6.87E-07 | ADM, AGTR1, ALDH1A1, ANGPTL4, ARHGAP35, ATF7, BCOR, CCBE1, COL8A1, CXCL14, DLL4, EMP1, EN1, EYA1, FBN1, FOXF1, FOXF2, FOXQ1, GAL, HMGA2, HOXA13, HOXB3, HOXC4, HSD17B2, HSPG2, IL11RA, INSIG2, INSR, ISL1, LAMA3, LAMB2, LRP4, MEOX2, MITF, MSX1, NCAM1, ODC1, PITX1, PLAU, PRKAR2B, PTCH2, RBL2 (includes EG:100331892), SHROOM4, SIX2, SPAG4, STRA6, STRBP, TBX19, TBX4, TET2, TOB2, WNT2, XIRP1, ZEB2                                                                                                                              | 54          |
| Organ Development                                     | organogenesis             | 6.87E-07 | ADM, AGTR1, ALDH1A1, ANGPTL4, ARHGAP35, ATF7, BCOR, CCBE1, COL8A1, CXCL14, DLL4, EMP1, EN1, EYA1, FBN1, FOXF1, FOXF2, FOXQ1, GAL, HMGA2, HOXA13, HOXB3, HOXC4, HSD17B2, HSPG2, IL11RA, INSIG2, INSR, ISL1, LAMA3, LAMB2, LRP4, MEOX2, MITF, MSX1, NCAM1, ODC1, PITX1, PLAU, PRKAR2B, PTCH2, RBL2 (includes EG:100331892), SHROOM4, SIX2, SPAG4, STRA6, STRBP, TBX19, TBX4, TET2, TOB2, WNT2, XIRP1, ZEB2                                                                                                                              | 54          |
| Organismal Development                                | organogenesis             | 6.87E-07 | ADM, AGTR1, ALDH1A1, ANGPTL4, ARHGAP35, ATF7, BCOR, CCBE1, COL8A1, CXCL14, DLL4, EMP1, EN1, EYA1, FBN1, FOXF1, FOXF2, FOXQ1, GAL, HMGA2, HOXA13, HOXB3, HOXC4, HSD17B2, HSPG2, IL11RA, INSIG2, INSR, ISL1, LAMA3, LAMB2, LRP4, MEOX2, MITF, MSX1, NCAM1, ODC1, PITX1, PLAU, PRKAR2B, PTCH2, RBL2 (includes EG:100331892), SHROOM4, SIX2, SPAG4, STRA6, STRBP, TBX19, TBX4, TET2, TOB2, WNT2, XIRP1, ZEB2                                                                                                                              | 54          |
| Skeletal and Muscular System Development and Function | morphogenesis of skeleton | 8.92E-07 | EYA1, HOXB2, HOXB3, HOXB5, HOXB6, HSPG2, SATB2, SIX2                                                                                                                                                                                                                                                                                                                                                                                                                                                                                  | 8           |

|                          |                                  |          |                                                                                                                                                                                                                                                                                                                                                                                                                                                                                                                                                                                                                                                 |    |
|--------------------------|----------------------------------|----------|-------------------------------------------------------------------------------------------------------------------------------------------------------------------------------------------------------------------------------------------------------------------------------------------------------------------------------------------------------------------------------------------------------------------------------------------------------------------------------------------------------------------------------------------------------------------------------------------------------------------------------------------------|----|
| Gastrointestinal Disease | disorder of pancreas             | 1.35E-06 | ACAA2, ADAMTS5, AGMO, AGTR1, AKAP7, ALDH1A1, ANKRD44, ANO4, ATP9A, AUTS2, BRWD1, C10orf58, CA12, CBLB, CCBE1, CHRM2, COL8A1, CPE (includes EG:12876), CXCL14, DAAM1, DKK2, DMXL1, DOK6, FAM172A, FBN1, GAL, GALNT13, GAN, GCA, GPAM, HIST1H3A (includes others), HLA-DMA, HOXC8, HPSE2, HTATIP2, HTR2A, IL1RAP, INSR, JMY, KCNB2, KDM4C, KIAA0408, KIFAP3, KLHL29, LAMA3, LRRC2, LXN, MAGI1 (includes EG:14924), MCTP1, MXI1, MYO1D, NCAM1, NLRP1, ODZ2, PAPP, PLA, POSTN, PRSS1/PRSS3, RASSF8, RBL2 (includes EG:100331892), SBF2, SESTD1, SGCD, SH3GL2, SH3YL1, SLC23A2, SORL1, SYNE1, TNS1, TSPAN18, TTL7, UMODL1, VGLL4, WDFY3, YPEL2, ZEB2 | 76 |
| Metabolic Disease        | glucose metabolism disorder      | 1.46E-06 | ACAA2, ADAMTS5, ADARB1, AGMO, AGTR1, AKAP7, ALDH1A1, ANKRD44, ANO4, ATP9A, AUTS2, BRWD1, C10orf58, CA12, CBLB, CCBE1, CHRM2, COL8A1, CPE (includes EG:12876), CXCL14, DAAM1, DKK2, DOK6, FAM172A, FBN1, GAL, GALNT13, GAN, GCA, GPAM, HIST1H3A (includes others), HLA-DMA, HOXC8, HPSE2, HTATIP2, HTR2A, IL1RAP, INSR, JMY, KCNB2, KDM4C, KIAA0408, KIFAP3, KLHL29, LAMA3, LRRC2, LXN, MAGI1 (includes EG:14924), MCTP1, MXI1, MYO1D, NCAM1, NLRP1, ODZ2, PAPP, RASSF8, RBL2 (includes EG:100331892), SBF2, SESTD1, SGCD, SH3GL2, SH3YL1, SLC23A2, SLC27A1, SORL1, SYNE1, TNS1, TSPAN18, TTL7, UMODL1, VGLL4, WDFY3, YPEL2, ZEB2                | 74 |
| Tissue Development       | development of connective tissue | 1.69E-06 | ADM, ALDH1A1, ARSE, BCOR, C10orf58, COL12A1, EN1, EYA1, FBN1, FCGR2B, FZD1, HOXA13, HOXB2, HOXB3, HOXC4, HOXC8, HSPG2, INSIG2, LAMA3, MITF, MSX1, PITX1, POSTN, PTN, RBL2 (includes EG:100331892), SATB2, SIX2, TBX4, TOB2                                                                                                                                                                                                                                                                                                                                                                                                                      | 29 |
| Gastrointestinal Disease | diabetes mellitus                | 3.34E-06 | ACAA2, ADAMTS5, AGMO, AGTR1, AKAP7, ALDH1A1, ANKRD44, ANO4, ATP9A, AUTS2, BRWD1, C10orf58, CA12, CBLB, CCBE1, CHRM2, COL8A1, DAAM1, DKK2, DOK6, FAM172A, FBN1, GAL, GALNT13, GAN, GCA, GPAM, HIST1H3A (includes others), HLA-DMA, HOXC8, HPSE2, HTATIP2, HTR2A, IL1RAP, INSR, JMY, KCNB2, KDM4C, KIAA0408, KIFAP3, KLHL29, LAMA3, LRRC2, LXN, MAGI1 (includes EG:14924), MCTP1, MXI1, MYO1D, NCAM1, NLRP1, ODZ2, PAPP, RASSF8, RBL2 (includes EG:100331892), SBF2, SESTD1, SGCD, SH3GL2, SH3YL1, SLC23A2, SORL1, SYNE1, TNS1, TSPAN18, TTL7, UMODL1, VGLL4, WDFY3, YPEL2, ZEB2                                                                  | 70 |
| Metabolic Disease        | diabetes mellitus                | 3.34E-06 | ACAA2, ADAMTS5, AGMO, AGTR1, AKAP7, ALDH1A1, ANKRD44, ANO4, ATP9A, AUTS2, BRWD1, C10orf58, CA12, CBLB, CCBE1, CHRM2, COL8A1, DAAM1, DKK2, DOK6, FAM172A, FBN1, GAL, GALNT13, GAN, GCA, GPAM, HIST1H3A (includes others), HLA-DMA, HOXC8, HPSE2, HTATIP2, HTR2A, IL1RAP, INSR, JMY, KCNB2, KDM4C, KIAA0408, KIFAP3, KLHL29, LAMA3, LRRC2, LXN, MAGI1 (includes EG:14924), MCTP1, MXI1, MYO1D, NCAM1, NLRP1, ODZ2, PAPP, RASSF8, RBL2 (includes EG:100331892), SBF2, SESTD1, SGCD, SH3GL2, SH3YL1, SLC23A2, SORL1, SYNE1, TNS1, TSPAN18, TTL7, UMODL1, VGLL4, WDFY3, YPEL2, ZEB2                                                                  | 70 |

|                                                       |                         |          |                                                                                                                                                                                                                                                                                                                                                                                                                                                                                                                                                                                |    |
|-------------------------------------------------------|-------------------------|----------|--------------------------------------------------------------------------------------------------------------------------------------------------------------------------------------------------------------------------------------------------------------------------------------------------------------------------------------------------------------------------------------------------------------------------------------------------------------------------------------------------------------------------------------------------------------------------------|----|
| Endocrine System Disorders                            | diabetes mellitus       | 3.34E-06 | ACAA2, ADAMTS5, AGMO, AGTR1, AKAP7, ALDH1A1, ANKRD44, ANO4, ATP9A, AUTS2, BRWD1, C10orf58, CA12, CBLB, CCBE1, CHRM2, COL8A1, DAAM1, DKK2, DOK6, FAM172A, FBN1, GAL, GALNT13, GAN, GCA, GPAM, HIST1H3A (includes others), HLA-DMA, HOXC8, HPSE2, HTATIP2, HTR2A, IL1RAP, INSR, JMY, KCNB2, KDM4C, KIAA0408, KIFAP3, KLHL29, LAMA3, LRRC2, LXN, MAGI1 (includes EG:14924), MCTP1, MXI1, MYO1D, NCAM1, NLRP1, ODZ2, PAPP, RASSF8, RBL2 (includes EG:100331892), SBF2, SESTD1, SGCD, SH3GL2, SH3YL1, SLC23A2, SORL1, SYNE1, TNS1, TSPAN18, TTL7, UMODL1, VGLL4, WDFY3, YPEL2, ZEB2 | 70 |
| Skeletal and Muscular System Development and Function | development of skeleton | 4.84E-06 | BCOR, EN1, EYA1, HOXB2, HOXB3, HOXB5, HOXB6, HOXC8, HSPG2, MEOX2, POSTN, PTN, SATB2, SIX2, TOB2                                                                                                                                                                                                                                                                                                                                                                                                                                                                                | 15 |
| Tissue Development                                    | development of organ    | 4.90E-06 | ADM, AGTR1, ALDH1A1, ANGPTL4, ARHGAP35, ATF7, BCOR, COL8A1, CXCL14, EMP1, EN1, EYA1, FBN1, FOXF1, FOXF2, FOXQ1, GAL, HMGA2, HOXA13, HOXB3, HOXC4, HSD17B2, HSPG2, IL11RA, INSIG2, INSR, ISL1, LAMA3, LAMB2, LRP4, MEOX2, MITF, MSX1, NCAM1, ODC1, PITX1, PLAU, PRKAR2B, PTCH2, SHROOM4, SIX2, SPAG4, STRA6, STRBP, TBX19, TBX4, TET2, TOB2, WNT2, XIRP1, ZEB2                                                                                                                                                                                                                  | 51 |
| Embryonic Development                                 | development of organ    | 4.90E-06 | ADM, AGTR1, ALDH1A1, ANGPTL4, ARHGAP35, ATF7, BCOR, COL8A1, CXCL14, EMP1, EN1, EYA1, FBN1, FOXF1, FOXF2, FOXQ1, GAL, HMGA2, HOXA13, HOXB3, HOXC4, HSD17B2, HSPG2, IL11RA, INSIG2, INSR, ISL1, LAMA3, LAMB2, LRP4, MEOX2, MITF, MSX1, NCAM1, ODC1, PITX1, PLAU, PRKAR2B, PTCH2, SHROOM4, SIX2, SPAG4, STRA6, STRBP, TBX19, TBX4, TET2, TOB2, WNT2, XIRP1, ZEB2                                                                                                                                                                                                                  | 51 |
| Organ Development                                     | development of organ    | 4.90E-06 | ADM, AGTR1, ALDH1A1, ANGPTL4, ARHGAP35, ATF7, BCOR, COL8A1, CXCL14, EMP1, EN1, EYA1, FBN1, FOXF1, FOXF2, FOXQ1, GAL, HMGA2, HOXA13, HOXB3, HOXC4, HSD17B2, HSPG2, IL11RA, INSIG2, INSR, ISL1, LAMA3, LAMB2, LRP4, MEOX2, MITF, MSX1, NCAM1, ODC1, PITX1, PLAU, PRKAR2B, PTCH2, SHROOM4, SIX2, SPAG4, STRA6, STRBP, TBX19, TBX4, TET2, TOB2, WNT2, XIRP1, ZEB2                                                                                                                                                                                                                  | 51 |
| Organismal Development                                | development of organ    | 4.90E-06 | ADM, AGTR1, ALDH1A1, ANGPTL4, ARHGAP35, ATF7, BCOR, COL8A1, CXCL14, EMP1, EN1, EYA1, FBN1, FOXF1, FOXF2, FOXQ1, GAL, HMGA2, HOXA13, HOXB3, HOXC4, HSD17B2, HSPG2, IL11RA, INSIG2, INSR, ISL1, LAMA3, LAMB2, LRP4, MEOX2, MITF, MSX1, NCAM1, ODC1, PITX1, PLAU, PRKAR2B, PTCH2, SHROOM4, SIX2, SPAG4, STRA6, STRBP, TBX19, TBX4, TET2, TOB2, WNT2, XIRP1, ZEB2                                                                                                                                                                                                                  | 51 |

|                                                       |                     |          |                                                                                                                                                                                                                                                                                                                                                                                                                                                                                                                                                                                                                                                                                                                                                                             |    |
|-------------------------------------------------------|---------------------|----------|-----------------------------------------------------------------------------------------------------------------------------------------------------------------------------------------------------------------------------------------------------------------------------------------------------------------------------------------------------------------------------------------------------------------------------------------------------------------------------------------------------------------------------------------------------------------------------------------------------------------------------------------------------------------------------------------------------------------------------------------------------------------------------|----|
| Cancer                                                | neoplasia           | 9.21E-06 | ADAMTS5, ADARB1, ADM, AGTR1, ALDH1A1, ALDOC, ANGPTL4, ARL4C, ARSE, ASB5, B3GNT6, BDKRB2, C7orf68, CAPG, CBLB, CHRM2, CLDN7, COL12A1, CXCL14, DMXL1, DYRK2, EMP1, EN1, EYA1, FAM46C, FBN1, FOXF1, FOXF2, FOXQ1, FZD1, GAL, GPRC5A, GPRC5C, H2AFY, HIST1H3A (includes others), HMGA2, HOXB2, HOXB3, HOXB5, HOXB6, HOXC4, HOXC5, HSD17B2, HTATIP2, HTR2A, IFT81, IL1RAP, INSR, ISOC1, KCNK2, KDM5A, KLF3, LAMA3, LRRN4, MEOX2, MFAP3L, MGST2, MITF, MLH3 (includes EG:217716), MPDZ, MSX1, MXI1, NAMPT, NBR2, NCAM1, NLRP1, NRN1, ODC1, PAPP, PDK4, PEAK1, PLAU, PMAIP1, POSTN, PTCH2, PTN, RARRES1, RBL2 (includes EG:100331892), SATB2, SLC23A2, SLC27A1, SMG1, SNCAIP, STRA6, SYNE1, TBX4, TET2, TIMP4, TNS1, TRPC6, WNK1, WNT2, XIRP1, ZEB2                                | 94 |
| Cancer                                                | cancer              | 1.06E-05 | ADAMTS5, ADARB1, ADM, AGTR1, ALDH1A1, ALDOC, ANGPTL4, ARL4C, ARSE, ASB5, B3GNT6, BDKRB2, C7orf68, CAPG, CBLB, CHRM2, CLDN7, COL12A1, CXCL14, DMXL1, DYRK2, EMP1, EN1, EYA1, FAM46C, FBN1, FOXF1, FOXF2, FOXQ1, FZD1, GAL, GPRC5A, GPRC5C, H2AFY, HIST1H3A (includes others), HMGA2, HOXB2, HOXB3, HOXB5, HOXB6, HOXC4, HOXC5, HSD17B2, HTATIP2, HTR2A, IFT81, IL1RAP, INSR, KCNK2, KDM5A, KLF3, LAMA3, LRRN4, MEOX2, MFAP3L, MGST2, MITF, MLH3 (includes EG:217716), MPDZ, MSX1, MXI1, NAMPT, NBR2, NCAM1, NLRP1, NRN1, ODC1, PAPP, PDK4, PEAK1, PLAU, PMAIP1, POSTN, PTCH2, RARRES1, RBL2 (includes EG:100331892), SATB2, SLC23A2, SLC27A1, SMG1, SNCAIP, STRA6, SYNE1, TBX4, TET2, TIMP4, TNS1, TRPC6, WNK1, WNT2, XIRP1, ZEB2                                            | 92 |
| Cancer                                                | tumorigenesis       | 2.04E-05 | ADAMTS5, ADARB1, ADM, AGTR1, ALDH1A1, ALDOC, ANGPTL4, ARL4C, ARSE, ASB5, B3GNT6, BDKRB2, C7orf68, CAPG, CBLB, CHRM2, CLDN7, COL12A1, CXCL14, DLL4, DMXL1, DYRK2, EMP1, EN1, EYA1, FAM46C, FBN1, FOXF1, FOXF2, FOXQ1, FZD1, GAL, GPRC5A, GPRC5C, H2AFY, HIST1H3A (includes others), HMGA2, HOXB2, HOXB3, HOXB5, HOXB6, HOXC4, HOXC5, HSD17B2, HTATIP2, HTR2A, IFT81, IL1RAP, INSR, ISOC1, KCNK2, KDM5A, KLF3, LAMA3, LRRN4, MEOX2, MFAP3L, MGST2, MITF, MLH3 (includes EG:217716), MPDZ, MPI, MSX1, MXI1, NAMPT, NBR2, NCAM1, NLRP1, NRN1, ODC1, PAPP, PDK4, PEAK1, PITX1, PLAU, PMAIP1, POSTN, PRSS1/PRSS3, PTCH2, PTN, RARRES1, RBL2 (includes EG:100331892), SATB2, SLC23A2, SLC27A1, SMG1, SNCAIP, STRA6, SYNE1, TBX4, TET2, TIMP4, TNS1, TRPC6, WNK1, WNT2, XIRP1, ZEB2 | 98 |
| Tissue Development                                    | development of bone | 3.27E-05 | ALDH1A1, ARSE, BCOR, C10orf58, COL12A1, EN1, EYA1, FBN1, FCGR2B, FZD1, HOXA13, HOXB2, HOXC4, HOXC8, HSPG2, MITF, MSX1, PITX1, POSTN, PTN, RBL2 (includes EG:100331892), SATB2, TBX4, TOB2                                                                                                                                                                                                                                                                                                                                                                                                                                                                                                                                                                                   | 24 |
| Skeletal and Muscular System Development and Function | development of bone | 3.27E-05 | ALDH1A1, ARSE, BCOR, C10orf58, COL12A1, EN1, EYA1, FBN1, FCGR2B, FZD1, HOXA13, HOXB2, HOXC4, HOXC8, HSPG2, MITF, MSX1, PITX1, POSTN, PTN, RBL2 (includes EG:100331892), SATB2, TBX4, TOB2                                                                                                                                                                                                                                                                                                                                                                                                                                                                                                                                                                                   | 24 |

|                                            |                                         |          |                                                                                                                                                                                                                                                                                                                                               |    |
|--------------------------------------------|-----------------------------------------|----------|-----------------------------------------------------------------------------------------------------------------------------------------------------------------------------------------------------------------------------------------------------------------------------------------------------------------------------------------------|----|
| Connective Tissue Development and Function | development of bone                     | 3.27E-05 | ALDH1A1, ARSE, BCOR, C10orf58, COL12A1, EN1, EYA1, FBN1, FCGR2B, FZD1, HOXA13, HOXB2, HOXC4, HOXC8, HSPG2, MITF, MSX1, PITX1, POSTN, PTN, RBL2 (includes EG:100331892), SATB2, TBX4, TOB2                                                                                                                                                     | 24 |
| Gastrointestinal Disease                   | non-insulin-dependent diabetes mellitus | 3.85E-05 | ACAA2, AGMO, AGTR1, ALDH1A1, ANKRD44, ATP9A, AUTS2, BRWD1, C10orf58, CA12, CBLB, CHRM2, DAAM1, DKK2, DOK6, FAM172A, FBN1, GALNT13, GPAM, HOXC8, HPSE2, HTR2A, IL1RAP, INSR, JMY, KCNB2, KIFAP3, LXN, MCTP1, ODZ2, RBL2 (includes EG:100331892), SBF2, SGCD, SH3GL2, SH3YL1, SLC23A2, SORL1, SYNE1, TNS1, TSPAN18, TTLL7, UMODL1, VGLL4, YPEL2 | 44 |
| Metabolic Disease                          | non-insulin-dependent diabetes mellitus | 3.85E-05 | ACAA2, AGMO, AGTR1, ALDH1A1, ANKRD44, ATP9A, AUTS2, BRWD1, C10orf58, CA12, CBLB, CHRM2, DAAM1, DKK2, DOK6, FAM172A, FBN1, GALNT13, GPAM, HOXC8, HPSE2, HTR2A, IL1RAP, INSR, JMY, KCNB2, KIFAP3, LXN, MCTP1, ODZ2, RBL2 (includes EG:100331892), SBF2, SGCD, SH3GL2, SH3YL1, SLC23A2, SORL1, SYNE1, TNS1, TSPAN18, TTLL7, UMODL1, VGLL4, YPEL2 | 44 |
| Endocrine System Disorders                 | non-insulin-dependent diabetes mellitus | 3.85E-05 | ACAA2, AGMO, AGTR1, ALDH1A1, ANKRD44, ATP9A, AUTS2, BRWD1, C10orf58, CA12, CBLB, CHRM2, DAAM1, DKK2, DOK6, FAM172A, FBN1, GALNT13, GPAM, HOXC8, HPSE2, HTR2A, IL1RAP, INSR, JMY, KCNB2, KIFAP3, LXN, MCTP1, ODZ2, RBL2 (includes EG:100331892), SBF2, SGCD, SH3GL2, SH3YL1, SLC23A2, SORL1, SYNE1, TNS1, TSPAN18, TTLL7, UMODL1, VGLL4, YPEL2 | 44 |
| Genetic Disorder                           | non-insulin-dependent diabetes mellitus | 3.85E-05 | ACAA2, AGMO, AGTR1, ALDH1A1, ANKRD44, ATP9A, AUTS2, BRWD1, C10orf58, CA12, CBLB, CHRM2, DAAM1, DKK2, DOK6, FAM172A, FBN1, GALNT13, GPAM, HOXC8, HPSE2, HTR2A, IL1RAP, INSR, JMY, KCNB2, KIFAP3, LXN, MCTP1, ODZ2, RBL2 (includes EG:100331892), SBF2, SGCD, SH3GL2, SH3YL1, SLC23A2, SORL1, SYNE1, TNS1, TSPAN18, TTLL7, UMODL1, VGLL4, YPEL2 | 44 |
| Genetic Disorder                           | bipolar disorder                        | 5.05E-05 | AGPAT4, ANO4, AUTS2, CA12, CCBE1, CHRM2, COL8A1, DOK6, FAM172A, GNAZ, HPSE2, HSD17B2, HSPG2, HTR2A, INSR, KIFAP3, KLHL29, LAMA3, LRRC2, MAGI1 (includes EG:14924), MCTP1, MITF, NCAM1, NLRP1, OLFM2, OLFML2B, RAB38, SATB2, SGCD, SLC27A6, SORL1, STARD9, SYNE1, TRPC6, TTLL7, ZEB2                                                           | 36 |
| Neurological Disease                       | bipolar disorder                        | 5.05E-05 | AGPAT4, ANO4, AUTS2, CA12, CCBE1, CHRM2, COL8A1, DOK6, FAM172A, GNAZ, HPSE2, HSD17B2, HSPG2, HTR2A, INSR, KIFAP3, KLHL29, LAMA3, LRRC2, MAGI1 (includes EG:14924), MCTP1, MITF, NCAM1, NLRP1, OLFM2, OLFML2B, RAB38, SATB2, SGCD, SLC27A6, SORL1, STARD9, SYNE1, TRPC6, TTLL7, ZEB2                                                           | 36 |
| Psychological Disorders                    | bipolar disorder                        | 5.05E-05 | AGPAT4, ANO4, AUTS2, CA12, CCBE1, CHRM2, COL8A1, DOK6, FAM172A, GNAZ, HPSE2, HSD17B2, HSPG2, HTR2A, INSR, KIFAP3, KLHL29, LAMA3, LRRC2, MAGI1 (includes EG:14924), MCTP1, MITF, NCAM1, NLRP1, OLFM2, OLFML2B, RAB38, SATB2, SGCD, SLC27A6, SORL1, STARD9, SYNE1, TRPC6, TTLL7, ZEB2                                                           | 36 |

|                                                       |                                |          |                                                                                                                                                                                                                                                                                                                                        |    |
|-------------------------------------------------------|--------------------------------|----------|----------------------------------------------------------------------------------------------------------------------------------------------------------------------------------------------------------------------------------------------------------------------------------------------------------------------------------------|----|
| Tissue Development                                    | development of endocrine gland | 5.23E-05 | EYA1, HMGA2, HOXB3, ISL1, PITX1, PLAU, STRA6, TBX19                                                                                                                                                                                                                                                                                    | 8  |
| Embryonic Development                                 | development of endocrine gland | 5.23E-05 | EYA1, HMGA2, HOXB3, ISL1, PITX1, PLAU, STRA6, TBX19                                                                                                                                                                                                                                                                                    | 8  |
| Organ Development                                     | development of endocrine gland | 5.23E-05 | EYA1, HMGA2, HOXB3, ISL1, PITX1, PLAU, STRA6, TBX19                                                                                                                                                                                                                                                                                    | 8  |
| Organismal Development                                | development of endocrine gland | 5.23E-05 | EYA1, HMGA2, HOXB3, ISL1, PITX1, PLAU, STRA6, TBX19                                                                                                                                                                                                                                                                                    | 8  |
| Embryonic Development                                 | development of body axis       | 5.74E-05 | ARL13B, EYA1, FOXF1, HOXB2, HOXB3, HOXB5, HOXB6, HOXC4, HOXC5, HOXC8, PITX1, STRA6                                                                                                                                                                                                                                                     | 12 |
| Organismal Development                                | development of body axis       | 5.74E-05 | ARL13B, EYA1, FOXF1, HOXB2, HOXB3, HOXB5, HOXB6, HOXC4, HOXC5, HOXC8, PITX1, STRA6                                                                                                                                                                                                                                                     | 12 |
| Cellular Function and Maintenance                     | depolarization of tissue       | 6.22E-05 | FOXF1, FOXF2, TRPC6                                                                                                                                                                                                                                                                                                                    | 3  |
| Tissue Morphology                                     | depolarization of tissue       | 6.22E-05 | FOXF1, FOXF2, TRPC6                                                                                                                                                                                                                                                                                                                    | 3  |
| Digestive System Development and Function             | development of palate          | 7.12E-05 | BCOR, FOXF2, INSIG2, MEOX2, MSX1, PITX1, SATB2                                                                                                                                                                                                                                                                                         | 7  |
| Psychological Disorders                               | mood disorder                  | 7.15E-05 | AGPAT4, ANO4, AUTS2, CA12, CCBE1, CHRM2, COL8A1, DOK6, FAM172A, GNAZ, HPSE2, HSD17B2, HSPG2, HTR2A, INSR, KIFAP3, KLHL29, LAMA3, LRP4, LRRC2, MAGI1 (includes EG:14924), MCTP1, MITF, NCAM1, NLRP1, NPIPL3 (includes others), OLFM2, OLFML2B, PTN, RAB38, SATB2, SGCD, SLC27A6, SORL1, STARD9, SYNE1, TRPC6, TLL7, ZEB2                | 39 |
| Tissue Development                                    | development of skeletal system | 9.21E-05 | ARSE, COL12A1, EN1, FBN1, HOXA13, HOXB2, HOXC4, HOXC8, PITX1, POSTN, TBX4                                                                                                                                                                                                                                                              | 11 |
| Skeletal and Muscular System Development and Function | development of skeletal system | 9.21E-05 | ARSE, COL12A1, EN1, FBN1, HOXA13, HOXB2, HOXC4, HOXC8, PITX1, POSTN, TBX4                                                                                                                                                                                                                                                              | 11 |
| Connective Tissue Development and Function            | development of skeletal system | 9.21E-05 | ARSE, COL12A1, EN1, FBN1, HOXA13, HOXB2, HOXC4, HOXC8, PITX1, POSTN, TBX4                                                                                                                                                                                                                                                              | 11 |
| Gastrointestinal Disease                              | metastatic colorectal cancer   | 9.67E-05 | CAPG, EMP1, EN1, FOXF1, FOXF2, KCNK2, LAMA3, MSX1, NLRP1, NRN1, PAPP                                                                                                                                                                                                                                                                   | 11 |
| Cancer                                                | metastatic colorectal cancer   | 9.67E-05 | CAPG, EMP1, EN1, FOXF1, FOXF2, KCNK2, LAMA3, MSX1, NLRP1, NRN1, PAPP                                                                                                                                                                                                                                                                   | 11 |
| Cardiovascular Disease                                | heart disease                  | 1.06E-04 | ADARB1, ADM, AGTR1, ALDH1A1, ANO4, AUTS2, BDKRB2, CA12, CACNG4, CHRM2, COL12A1, DAAM1, DOK6, F2RL1, FER, HMGA2, INSR, ISL1, KCNB2, KCNK2, KDM4C, KIFAP3, KLHL29, MCTP1, MEF2A, MYO1D, NBEAL1, ODZ2, OLFM2, PAPP, PEAK1, PHF20, PLAU, PLEKHA6, POSTN, RASSF8, SBF2, SCAPER, SGCD, SH3GL2, SIX2, SLC23A2, SYNE1, TET2, TNS1, TRPC6, WNK1 | 47 |

|                                   |                                     |          |                                                                                                                                                                                                                                                                                                                                                                                                                                                                                                                                                                                                      |    |
|-----------------------------------|-------------------------------------|----------|------------------------------------------------------------------------------------------------------------------------------------------------------------------------------------------------------------------------------------------------------------------------------------------------------------------------------------------------------------------------------------------------------------------------------------------------------------------------------------------------------------------------------------------------------------------------------------------------------|----|
| Cancer                            | solid tumor                         | 1.35E-04 | ADAMTS5, ADM, AGTR1, ALDH1A1, ALDOC, ANGPTL4, ARL4C, ARSE, B3GNT6, BDKRB2, C7orf68, CAPG, CHRM2, CLDN7, CXCL14, DMXL1, EMP1, EN1, EYA1, FBN1, FOXF1, FOXF2, FOXQ1, FZD1, GAL, GPRC5A, GPRC5C, H2AFY, HIST1H3A (includes others), HMGA2, HOXB2, HOXB5, HOXB6, HOXC4, HOXC5, HSD17B2, HTATIP2, HTR2A, IFT81, INSR, KCNK2, KDM5A, LAMA3, LRRN4, MEOX2, MGST2, MLH3 (includes EG:217716), MSX1, MXI1, NAMPT, NBR2, NCAM1, NLRP1, NRN1, ODC1, PAPP, PEAK1, PLAU, PMAIP1, POSTN, PTCH2, RARRES1, RBL2 (includes EG:100331892), SATB2, SLC23A2, SLC27A1, SMG1, SNCAIP, SYNE1, TBX4, TIMP4, WNK1, WNT2, ZEB2 | 74 |
| Tissue Development                | development of gland                | 1.46E-04 | EN1, EYA1, FOXF1, HMGA2, HOXB3, ISL1, PITX1, PLAU, STRA6, TBX19                                                                                                                                                                                                                                                                                                                                                                                                                                                                                                                                      | 10 |
| Embryonic Development             | development of gland                | 1.46E-04 | EN1, EYA1, FOXF1, HMGA2, HOXB3, ISL1, PITX1, PLAU, STRA6, TBX19                                                                                                                                                                                                                                                                                                                                                                                                                                                                                                                                      | 10 |
| Organ Development                 | development of gland                | 1.46E-04 | EN1, EYA1, FOXF1, HMGA2, HOXB3, ISL1, PITX1, PLAU, STRA6, TBX19                                                                                                                                                                                                                                                                                                                                                                                                                                                                                                                                      | 10 |
| Organismal Development            | development of gland                | 1.46E-04 | EN1, EYA1, FOXF1, HMGA2, HOXB3, ISL1, PITX1, PLAU, STRA6, TBX19                                                                                                                                                                                                                                                                                                                                                                                                                                                                                                                                      | 10 |
| Cancer                            | carcinoma                           | 1.88E-04 | ADAMTS5, AGTR1, ALDH1A1, ALDOC, ANGPTL4, ARL4C, ARSE, B3GNT6, BDKRB2, C7orf68, CAPG, CHRM2, CLDN7, CXCL14, DMXL1, EMP1, EN1, EYA1, FBN1, FOXF1, FOXF2, FOXQ1, FZD1, GAL, GPRC5A, GPRC5C, H2AFY, HIST1H3A (includes others), HMGA2, HOXB2, HOXB5, HOXB6, HOXC4, HOXC5, HSD17B2, HTATIP2, IFT81, INSR, KCNK2, KDM5A, LAMA3, LRRN4, MEOX2, MGST2, MLH3 (includes EG:217716), MSX1, MXI1, NAMPT, NBR2, NCAM1, NLRP1, NRN1, ODC1, PAPP, PEAK1, PLAU, PMAIP1, POSTN, PTCH2, RARRES1, RBL2 (includes EG:100331892), SATB2, SLC23A2, SLC27A1, SMG1, SNCAIP, SYNE1, TBX4, TIMP4, WNK1, WNT2, ZEB2             | 72 |
| Tissue Development                | formation of tissue                 | 2.03E-04 | ALDH1A1, ARSE, C10orf58, COL12A1, EN1, FBN1, FCGR2B, FZD1, HOXA13, HOXB2, HOXC4, HOXC8, MEOX2, MITF, NCAM1, PAPP, PITX1, PLAU, POSTN, PTN, TBX4, TOB2, TRPC6                                                                                                                                                                                                                                                                                                                                                                                                                                         | 23 |
| Behavior                          | navigation                          | 2.19E-04 | GAL, HOMER1                                                                                                                                                                                                                                                                                                                                                                                                                                                                                                                                                                                          | 2  |
| Developmental Disorder            | hypoplasia of smooth muscle cells   | 2.19E-04 | FOXF1, FOXF2                                                                                                                                                                                                                                                                                                                                                                                                                                                                                                                                                                                         | 2  |
| Skeletal and Muscular Disorders   | hypoplasia of smooth muscle cells   | 2.19E-04 | FOXF1, FOXF2                                                                                                                                                                                                                                                                                                                                                                                                                                                                                                                                                                                         | 2  |
| Cellular Function and Maintenance | depolarization of epithelial tissue | 2.19E-04 | FOXF1, FOXF2                                                                                                                                                                                                                                                                                                                                                                                                                                                                                                                                                                                         | 2  |
| Tissue Morphology                 | depolarization of epithelial tissue | 2.19E-04 | FOXF1, FOXF2                                                                                                                                                                                                                                                                                                                                                                                                                                                                                                                                                                                         | 2  |
| Organ Development                 | morphogenesis of middle ear         | 2.31E-04 | EYA1, INSIG2, MSX1, SIX2                                                                                                                                                                                                                                                                                                                                                                                                                                                                                                                                                                             | 4  |

|                                                         |                             |          |                                                                                                                                                                                                                                                                        |    |
|---------------------------------------------------------|-----------------------------|----------|------------------------------------------------------------------------------------------------------------------------------------------------------------------------------------------------------------------------------------------------------------------------|----|
| Auditory and Vestibular System Development and Function | morphogenesis of middle ear | 2.31E-04 | EYA1, INSIG2, MSX1, SIX2                                                                                                                                                                                                                                               | 4  |
| Lipid Metabolism                                        | metabolism of acylglycerol  | 3.15E-04 | BDKRB2, CPS1, GK, GPAM, INSIG2, NCAM1, PLAU, SLC27A1                                                                                                                                                                                                                   | 8  |
| Small Molecule Biochemistry                             | metabolism of acylglycerol  | 3.15E-04 | BDKRB2, CPS1, GK, GPAM, INSIG2, NCAM1, PLAU, SLC27A1                                                                                                                                                                                                                   | 8  |
| Cardiovascular Disease                                  | myocardial ischemia         | 3.45E-04 | ADARB1, AGTR1, ALDH1A1, ANO4, AUTS2, BDKRB2, CACNG4, COL12A1, DAAM1, DOK6, FER, HMGA2, INSR, KCNB2, KCNK2, KDM4C, KLHL29, MCTP1, MEF2A, MYO1D, NBEAL1, ODZ2, OLFM2, PEAK1, PHF20, PLEKHA6, POSTN, RASSF8, SBF2, SCAPER, SH3GL2, SIX2, SLC23A2, SYNE1, TET2, TNS1, WNK1 | 37 |
| Hematological Disease                                   | myocardial ischemia         | 3.45E-04 | ADARB1, AGTR1, ALDH1A1, ANO4, AUTS2, BDKRB2, CACNG4, COL12A1, DAAM1, DOK6, FER, HMGA2, INSR, KCNB2, KCNK2, KDM4C, KLHL29, MCTP1, MEF2A, MYO1D, NBEAL1, ODZ2, OLFM2, PEAK1, PHF20, PLEKHA6, POSTN, RASSF8, SBF2, SCAPER, SH3GL2, SIX2, SLC23A2, SYNE1, TET2, TNS1, WNK1 | 37 |
| Cardiovascular Disease                                  | aortic aneurysm             | 3.57E-04 | ADM, AGTR1, FBN1                                                                                                                                                                                                                                                       | 3  |
| Tissue Development                                      | formation of bone           | 3.62E-04 | ALDH1A1, ARSE, C10orf58, COL12A1, EN1, FBN1, FCGR2B, FZD1, HOXA13, HOXB2, HOXC4, HOXC8, MITF, PITX1, POSTN, TBX4, TOB2                                                                                                                                                 | 17 |
| Skeletal and Muscular System Development and Function   | formation of bone           | 3.62E-04 | ALDH1A1, ARSE, C10orf58, COL12A1, EN1, FBN1, FCGR2B, FZD1, HOXA13, HOXB2, HOXC4, HOXC8, MITF, PITX1, POSTN, TBX4, TOB2                                                                                                                                                 | 17 |
| Connective Tissue Development and Function              | formation of bone           | 3.62E-04 | ALDH1A1, ARSE, C10orf58, COL12A1, EN1, FBN1, FCGR2B, FZD1, HOXA13, HOXB2, HOXC4, HOXC8, MITF, PITX1, POSTN, TBX4, TOB2                                                                                                                                                 | 17 |
| Genetic Disorder                                        | coronary artery disease     | 3.92E-04 | ADARB1, AGTR1, ALDH1A1, ANO4, AUTS2, BDKRB2, CACNG4, COL12A1, DAAM1, DOK6, FER, HMGA2, KCNB2, KCNK2, KDM4C, KLHL29, MCTP1, MEF2A, MYO1D, NBEAL1, ODZ2, OLFM2, PEAK1, PHF20, PLEKHA6, POSTN, RASSF8, SBF2, SCAPER, SH3GL2, SIX2, SLC23A2, SYNE1, TET2, TNS1, WNK1       | 36 |
| Cardiovascular Disease                                  | coronary artery disease     | 3.92E-04 | ADARB1, AGTR1, ALDH1A1, ANO4, AUTS2, BDKRB2, CACNG4, COL12A1, DAAM1, DOK6, FER, HMGA2, KCNB2, KCNK2, KDM4C, KLHL29, MCTP1, MEF2A, MYO1D, NBEAL1, ODZ2, OLFM2, PEAK1, PHF20, PLEKHA6, POSTN, RASSF8, SBF2, SCAPER, SH3GL2, SIX2, SLC23A2, SYNE1, TET2, TNS1, WNK1       | 36 |
| Hematological Disease                                   | coronary artery disease     | 3.92E-04 | ADARB1, AGTR1, ALDH1A1, ANO4, AUTS2, BDKRB2, CACNG4, COL12A1, DAAM1, DOK6, FER, HMGA2, KCNB2, KCNK2, KDM4C, KLHL29, MCTP1, MEF2A, MYO1D, NBEAL1, ODZ2, OLFM2, PEAK1, PHF20, PLEKHA6, POSTN, RASSF8, SBF2, SCAPER, SH3GL2, SIX2, SLC23A2, SYNE1, TET2, TNS1, WNK1       | 36 |



|                            |                                     |          |                                                                                                                                                                                                                                                                                                                                                                                                                                                                                                |    |
|----------------------------|-------------------------------------|----------|------------------------------------------------------------------------------------------------------------------------------------------------------------------------------------------------------------------------------------------------------------------------------------------------------------------------------------------------------------------------------------------------------------------------------------------------------------------------------------------------|----|
| Immunological Disease      | autoimmune disease                  | 5.02E-04 | ADAMTS5, ADM, AGTR1, AKAP7, ANKRD12, ANO4, ATP9A, AUTS2, BDKRB2, CBLB, CCBE1, CHRM2, COL8A1, CXCL14, DLL4, DMXL1, DOK6, F2RL1, FBN1, FCGR2B, FCHO2, GAN, GCA, GLRB, GPC4, HIST1H3A (includes others), HLA-DMA, HOXC4, HPSE2, HTATIP2, HTR2A, INSR, KCNB2, KDM4C, KIAA0408, KLHL29, LAMA3, LRRC2, MAGI1 (includes EG:14924), MAPK1IP1L, MXI1, MYCBP2, MYO1D, NAMPT, NCAM1, NLRP1, ODZ2, PAPP, PRKAR2B, RASSF8, SBF2, SESTD1, SGCD, SH3GL2, SORL1, SYNE1, TBX19, TNS1, TTC7A, VGLL4, WDFY3, WNK1 | 62 |
| Gastrointestinal Disease   | insulin-dependent diabetes mellitus | 5.66E-04 | ADAMTS5, AGTR1, AKAP7, ANO4, CBLB, CCBE1, COL8A1, DOK6, GAN, GCA, HIST1H3A (includes others), HLA-DMA, HPSE2, HTATIP2, INSR, KCNB2, KDM4C, KIAA0408, KLHL29, LAMA3, LRRC2, MAGI1 (includes EG:14924), MXI1, MYO1D, NCAM1, NLRP1, PAPP, RASSF8, SBF2, SESTD1, SH3GL2, VGLL4, WDFY3                                                                                                                                                                                                              | 33 |
| Metabolic Disease          | insulin-dependent diabetes mellitus | 5.66E-04 | ADAMTS5, AGTR1, AKAP7, ANO4, CBLB, CCBE1, COL8A1, DOK6, GAN, GCA, HIST1H3A (includes others), HLA-DMA, HPSE2, HTATIP2, INSR, KCNB2, KDM4C, KIAA0408, KLHL29, LAMA3, LRRC2, MAGI1 (includes EG:14924), MXI1, MYO1D, NCAM1, NLRP1, PAPP, RASSF8, SBF2, SESTD1, SH3GL2, VGLL4, WDFY3                                                                                                                                                                                                              | 33 |
| Endocrine System Disorders | insulin-dependent diabetes mellitus | 5.66E-04 | ADAMTS5, AGTR1, AKAP7, ANO4, CBLB, CCBE1, COL8A1, DOK6, GAN, GCA, HIST1H3A (includes others), HLA-DMA, HPSE2, HTATIP2, INSR, KCNB2, KDM4C, KIAA0408, KLHL29, LAMA3, LRRC2, MAGI1 (includes EG:14924), MXI1, MYO1D, NCAM1, NLRP1, PAPP, RASSF8, SBF2, SESTD1, SH3GL2, VGLL4, WDFY3                                                                                                                                                                                                              | 33 |
| Immunological Disease      | insulin-dependent diabetes mellitus | 5.66E-04 | ADAMTS5, AGTR1, AKAP7, ANO4, CBLB, CCBE1, COL8A1, DOK6, GAN, GCA, HIST1H3A (includes others), HLA-DMA, HPSE2, HTATIP2, INSR, KCNB2, KDM4C, KIAA0408, KLHL29, LAMA3, LRRC2, MAGI1 (includes EG:14924), MXI1, MYO1D, NCAM1, NLRP1, PAPP, RASSF8, SBF2, SESTD1, SH3GL2, VGLL4, WDFY3                                                                                                                                                                                                              | 33 |
| Neurological Disease       | neuropathy                          | 5.99E-04 | AKAP7, CA12, CAPG, CHRM2, CPE (includes EG:12876), EFCAB4B, F2RL1, FAM172A, FER, FIG4, GAN, GPC4, GREB1L, HIST1H3A (includes others), HLA-DMA, HOMER1, HTR2A, INSR, JHDM1D, KDM4C, KDM5A, KLHL29, LTBP2, MYO1D, NAMPT, ODZ2, PRKAR2B, RNF122, RPS6KA6, SBF2, SH3GL2, SHROOM4, SNCAIP, TTC7A, WDFY3, WNK1, ZNF652                                                                                                                                                                               | 37 |
| Gastrointestinal Disease   | Hirschsprung disease                | 6.40E-04 | FOXF1, FOXF2, ZEB2                                                                                                                                                                                                                                                                                                                                                                                                                                                                             | 3  |
| Genetic Disorder           | Hirschsprung disease                | 6.40E-04 | FOXF1, FOXF2, ZEB2                                                                                                                                                                                                                                                                                                                                                                                                                                                                             | 3  |
| Neurological Disease       | Hirschsprung disease                | 6.40E-04 | FOXF1, FOXF2, ZEB2                                                                                                                                                                                                                                                                                                                                                                                                                                                                             | 3  |
| Developmental Disorder     | Hirschsprung disease                | 6.40E-04 | FOXF1, FOXF2, ZEB2                                                                                                                                                                                                                                                                                                                                                                                                                                                                             | 3  |
| Tissue Development         | development of colon                | 6.50E-04 | FOXF1, FOXF2                                                                                                                                                                                                                                                                                                                                                                                                                                                                                   | 2  |
| Embryonic Development      | development of colon                | 6.50E-04 | FOXF1, FOXF2                                                                                                                                                                                                                                                                                                                                                                                                                                                                                   | 2  |

|                                                |                                |          |                                                                                                                                                                          |    |
|------------------------------------------------|--------------------------------|----------|--------------------------------------------------------------------------------------------------------------------------------------------------------------------------|----|
| Organ Development                              | development of colon           | 6.50E-04 | FOXF1, FOXF2                                                                                                                                                             | 2  |
| Organismal Development                         | development of colon           | 6.50E-04 | FOXF1, FOXF2                                                                                                                                                             | 2  |
| Digestive System Development and Function      | development of colon           | 6.50E-04 | FOXF1, FOXF2                                                                                                                                                             | 2  |
| Endocrine System Disorders                     | Simpson-Golabi-Behmel syndrome | 6.50E-04 | GPC4, OFD1                                                                                                                                                               | 2  |
| Genetic Disorder                               | Simpson-Golabi-Behmel syndrome | 6.50E-04 | GPC4, OFD1                                                                                                                                                               | 2  |
| Developmental Disorder                         | Simpson-Golabi-Behmel syndrome | 6.50E-04 | GPC4, OFD1                                                                                                                                                               | 2  |
| Skeletal and Muscular Disorders                | Simpson-Golabi-Behmel syndrome | 6.50E-04 | GPC4, OFD1                                                                                                                                                               | 2  |
| Tissue Development                             | morphogenesis of organ         | 7.02E-04 | ALDH1A1, ARHGAP35, COL8A1, EYA1, FOXF1, HOXA13, HOXC4, INSR, ISL1, MITF, MSX1, PRKAR2B, STRA6, XIRP1                                                                     | 14 |
| Embryonic Development                          | morphogenesis of organ         | 7.02E-04 | ALDH1A1, ARHGAP35, COL8A1, EYA1, FOXF1, HOXA13, HOXC4, INSR, ISL1, MITF, MSX1, PRKAR2B, STRA6, XIRP1                                                                     | 14 |
| Organ Development                              | morphogenesis of organ         | 7.02E-04 | ALDH1A1, ARHGAP35, COL8A1, EYA1, FOXF1, HOXA13, HOXC4, INSR, ISL1, MITF, MSX1, PRKAR2B, STRA6, XIRP1                                                                     | 14 |
| Organismal Development                         | morphogenesis of organ         | 7.02E-04 | ALDH1A1, ARHGAP35, COL8A1, EYA1, FOXF1, HOXA13, HOXC4, INSR, ISL1, MITF, MSX1, PRKAR2B, STRA6, XIRP1                                                                     | 14 |
| Organ Morphology                               | morphogenesis of organ         | 7.02E-04 | ALDH1A1, ARHGAP35, COL8A1, EYA1, FOXF1, HOXA13, HOXC4, INSR, ISL1, MITF, MSX1, PRKAR2B, STRA6, XIRP1                                                                     | 14 |
| Tissue Development                             | cardiogenesis                  | 7.15E-04 | ADM, AGTR1, ATF7, BCOR, FBN1, FOXF1, HOXA13, HSPG2, INSR, ISL1, MSX1, STRA6, XIRP1                                                                                       | 13 |
| Embryonic Development                          | cardiogenesis                  | 7.15E-04 | ADM, AGTR1, ATF7, BCOR, FBN1, FOXF1, HOXA13, HSPG2, INSR, ISL1, MSX1, STRA6, XIRP1                                                                                       | 13 |
| Organ Development                              | cardiogenesis                  | 7.15E-04 | ADM, AGTR1, ATF7, BCOR, FBN1, FOXF1, HOXA13, HSPG2, INSR, ISL1, MSX1, STRA6, XIRP1                                                                                       | 13 |
| Organismal Development                         | cardiogenesis                  | 7.15E-04 | ADM, AGTR1, ATF7, BCOR, FBN1, FOXF1, HOXA13, HSPG2, INSR, ISL1, MSX1, STRA6, XIRP1                                                                                       | 13 |
| Cardiovascular System Development and Function | cardiogenesis                  | 7.15E-04 | ADM, AGTR1, ATF7, BCOR, FBN1, FOXF1, HOXA13, HSPG2, INSR, ISL1, MSX1, STRA6, XIRP1                                                                                       | 13 |
| Genetic Disorder                               | disorder of stature            | 7.96E-04 | ARSE, GPC4, HMGA2, HSPG2, INSR, OFD1                                                                                                                                     | 6  |
| Developmental Disorder                         | disorder of stature            | 7.96E-04 | ARSE, GPC4, HMGA2, HSPG2, INSR, OFD1                                                                                                                                     | 6  |
| Genetic Disorder                               | amyotrophic lateral sclerosis  | 7.98E-04 | AKAP7, CAPG, CHRM2, FER, GPC4, HIST1H3A (includes others), HTR2A, INSR, JHDM1D, KDM5A, KLHL29, LTBP2, MYO1D, NAMPT, ODZ2, RNF122, RPS6KA6, SHROOM4, TTC7A, WDFY3, ZNF652 | 21 |

|                                                      |                                      |          |                                                                                                                                                                                                                                                                                               |    |
|------------------------------------------------------|--------------------------------------|----------|-----------------------------------------------------------------------------------------------------------------------------------------------------------------------------------------------------------------------------------------------------------------------------------------------|----|
| Neurological Disease                                 | amyotrophic lateral sclerosis        | 7.98E-04 | AKAP7, CAPG, CHRM2, FER, GPC4, HIST1H3A (includes others), HTR2A, INSR, JHDM1D, KDM5A, KLHL29, LTBP2, MYO1D, NAMPT, ODZ2, RNF122, RPS6KA6, SHROOM4, TTC7A, WDFY3, ZNF652                                                                                                                      | 21 |
| Inflammatory Response                                | inflammation of synovial joint       | 8.24E-04 | BDKRB2, F2RL1, FCGR2B                                                                                                                                                                                                                                                                         | 3  |
| Cardiovascular Disease                               | vascular disease                     | 8.80E-04 | ADARB1, ADM, AGTR1, ALDH1A1, ANO4, AUTS2, BDKRB2, CA12, CACNG4, COL12A1, DAAM1, DOK6, FBN1, FER, HMGA2, INSR, KCNB2, KCNK2, KDM4C, KLHL29, MCTP1, MEF2A, MYO1D, NBEAL1, ODZ2, OLFM2, PEAK1, PHF20, PLAU, PLEKHA6, POSTN, RASSF8, SBF2, SCAPER, SH3GL2, SIX2, SLC23A2, SYNE1, TET2, TNS1, WNK1 | 41 |
| Genetic Disorder                                     | obesity                              | 8.93E-04 | ADARB1, AGTR1, ANGPTL4, CA12, CHRM2, CPE (includes EG:12876), GAL, HMGA2, HTR2A, INSIG2, INSR, NAMPT, PDK4, PRKAR2B, SLC27A1                                                                                                                                                                  | 15 |
| Nutritional Disease                                  | obesity                              | 8.93E-04 | ADARB1, AGTR1, ANGPTL4, CA12, CHRM2, CPE (includes EG:12876), GAL, HMGA2, HTR2A, INSIG2, INSR, NAMPT, PDK4, PRKAR2B, SLC27A1                                                                                                                                                                  | 15 |
| Tissue Development                                   | kidney development                   | 9.20E-04 | ADM, AGTR1, EYA1, FBN1, INSR, LRP4, ODC1, SIX2, STRA6, TET2                                                                                                                                                                                                                                   | 10 |
| Embryonic Development                                | kidney development                   | 9.20E-04 | ADM, AGTR1, EYA1, FBN1, INSR, LRP4, ODC1, SIX2, STRA6, TET2                                                                                                                                                                                                                                   | 10 |
| Organ Development                                    | kidney development                   | 9.20E-04 | ADM, AGTR1, EYA1, FBN1, INSR, LRP4, ODC1, SIX2, STRA6, TET2                                                                                                                                                                                                                                   | 10 |
| Organismal Development                               | kidney development                   | 9.20E-04 | ADM, AGTR1, EYA1, FBN1, INSR, LRP4, ODC1, SIX2, STRA6, TET2                                                                                                                                                                                                                                   | 10 |
| Renal and Urological System Development and Function | kidney development                   | 9.20E-04 | ADM, AGTR1, EYA1, FBN1, INSR, LRP4, ODC1, SIX2, STRA6, TET2                                                                                                                                                                                                                                   | 10 |
| Embryonic Development                                | patterning of rostrocaudal axis      | 1.01E-03 | HOXB2, HOXB3, HOXB5, HOXB6, HOXC4, HOXC5, HOXC8                                                                                                                                                                                                                                               | 7  |
| Organismal Development                               | patterning of rostrocaudal axis      | 1.01E-03 | HOXB2, HOXB3, HOXB5, HOXB6, HOXC4, HOXC5, HOXC8                                                                                                                                                                                                                                               | 7  |
| Cellular Movement                                    | migration of carcinoma cell lines    | 1.01E-03 | CLDN7, HTATIP2, POSTN, PTN, SATB2                                                                                                                                                                                                                                                             | 5  |
| Lipid Metabolism                                     | synthesis of diacylglycerol          | 1.37E-03 | BDKRB2, GPAM, NCAM1, PLAU                                                                                                                                                                                                                                                                     | 4  |
| Small Molecule Biochemistry                          | synthesis of diacylglycerol          | 1.37E-03 | BDKRB2, GPAM, NCAM1, PLAU                                                                                                                                                                                                                                                                     | 4  |
| Cardiovascular Disease                               | atherosclerosis                      | 1.38E-03 | ADARB1, AGTR1, ALDH1A1, ANO4, AUTS2, BDKRB2, CACNG4, COL12A1, DAAM1, DOK6, FER, HMGA2, KCNB2, KCNK2, KDM4C, KLHL29, MCTP1, MEF2A, MYO1D, NBEAL1, ODZ2, OLFM2, PEAK1, PHF20, PLAU, PLEKHA6, POSTN, RASSF8, SBF2, SCAPER, SH3GL2, SIX2, SLC23A2, SYNE1, TET2, TNS1, WNK1                        | 37 |
| Tissue Development                                   | organization of extracellular matrix | 1.64E-03 | CCDC80, FOXF1, FOXF2, HSPG2, OLFML2B, POSTN                                                                                                                                                                                                                                                   | 6  |
| Cancer                                               | leiomyomatosis                       | 1.65E-03 | ADARB1, ALDH1A1, ARSE, ASB5, CXCL14, DYRK2, FBN1, INSR, ISOC1, MFAP3L, PDK4, SMG1                                                                                                                                                                                                             | 12 |

|                                                       |                                       |          |                                                                                                                                |    |
|-------------------------------------------------------|---------------------------------------|----------|--------------------------------------------------------------------------------------------------------------------------------|----|
| Cancer                                                | metastasis                            | 1.69E-03 | ANGPTL4, CAPG, CHRM2, EMP1, EN1, FOXF1, FOXF2, HTATIP2, HTR2A, KCNK2, LAMA3, MITF, MSX1, NCAM1, NLRP1, NRN1, PAPP, PLAU, PTCH2 | 19 |
| Behavior                                              | mechanical allodynia behavior of mice | 1.87E-03 | F2RL1, GAL, PRSS1/PRSS3                                                                                                        | 3  |
| Genetic Disorder                                      | Marfan's syndrome                     | 1.87E-03 | AGTR1, ALDOC, FBN1                                                                                                             | 3  |
| Developmental Disorder                                | Marfan's syndrome                     | 1.87E-03 | AGTR1, ALDOC, FBN1                                                                                                             | 3  |
| Behavior                                              | olfactory memory                      | 2.12E-03 | GAL, PLAU                                                                                                                      | 2  |
| Nervous System Development and Function               | olfactory memory                      | 2.12E-03 | GAL, PLAU                                                                                                                      | 2  |
| Tissue Development                                    | angiogenesis of skeletal muscle       | 2.12E-03 | F2RL1, PLAU                                                                                                                    | 2  |
| Organismal Development                                | angiogenesis of skeletal muscle       | 2.12E-03 | F2RL1, PLAU                                                                                                                    | 2  |
| Skeletal and Muscular System Development and Function | angiogenesis of skeletal muscle       | 2.12E-03 | F2RL1, PLAU                                                                                                                    | 2  |
| Cardiovascular System Development and Function        | angiogenesis of skeletal muscle       | 2.12E-03 | F2RL1, PLAU                                                                                                                    | 2  |
| Hematological System Development and Function         | circulation of blood                  | 2.12E-03 | ADM, DLL4, HOXB2, MEOX2                                                                                                        | 4  |
| Tissue Development                                    | growth of tissue                      | 2.46E-03 | F2RL1, HSPG2, INSR, ODC1, PITX1, SIX2                                                                                          | 6  |
| Tissue Development                                    | development of pituitary gland        | 2.58E-03 | HMGA2, ISL1, PITX1, TBX19                                                                                                      | 4  |
| Embryonic Development                                 | development of pituitary gland        | 2.58E-03 | HMGA2, ISL1, PITX1, TBX19                                                                                                      | 4  |
| Organ Development                                     | development of pituitary gland        | 2.58E-03 | HMGA2, ISL1, PITX1, TBX19                                                                                                      | 4  |
| Organismal Development                                | development of pituitary gland        | 2.58E-03 | HMGA2, ISL1, PITX1, TBX19                                                                                                      | 4  |
| Endocrine System Development and Function             | development of pituitary gland        | 2.58E-03 | HMGA2, ISL1, PITX1, TBX19                                                                                                      | 4  |
| Reproductive System Development and Function          | development of pituitary gland        | 2.58E-03 | HMGA2, ISL1, PITX1, TBX19                                                                                                      | 4  |
| Tissue Development                                    | development of muscle                 | 2.87E-03 | F2RL1, FOXF1, HMGA2, HOXA13, HSPG2, MEOX2, MSX1, PAPP, PLAU, SGCD, STRA6, TRPC6, XIRP1                                         | 13 |

|                                                       |                                    |          |                                                                                                                                                                                                                                                                                                                                                                           |    |
|-------------------------------------------------------|------------------------------------|----------|---------------------------------------------------------------------------------------------------------------------------------------------------------------------------------------------------------------------------------------------------------------------------------------------------------------------------------------------------------------------------|----|
| Skeletal and Muscular System Development and Function | development of muscle              | 2.87E-03 | F2RL1, FOXF1, HMGA2, HOXA13, HSPG2, MEOX2, MSX1, PAPP, PLAU, SGCD, STRA6, TRPC6, XIRP1                                                                                                                                                                                                                                                                                    | 13 |
| Cardiovascular Disease                                | thoracic aortic aneurysm           | 3.15E-03 | AGTR1, FBN1                                                                                                                                                                                                                                                                                                                                                               | 2  |
| Lipid Metabolism                                      | release of aldosterone             | 3.15E-03 | ADM, AGTR1                                                                                                                                                                                                                                                                                                                                                                | 2  |
| Small Molecule Biochemistry                           | release of aldosterone             | 3.15E-03 | ADM, AGTR1                                                                                                                                                                                                                                                                                                                                                                | 2  |
| Endocrine System Development and Function             | release of aldosterone             | 3.15E-03 | ADM, AGTR1                                                                                                                                                                                                                                                                                                                                                                | 2  |
| Molecular Transport                                   | release of aldosterone             | 3.15E-03 | ADM, AGTR1                                                                                                                                                                                                                                                                                                                                                                | 2  |
| Organismal Development                                | development of secretory structure | 3.42E-03 | EN1, EYA1, FOXF1, GAL, HMGA2, HOXB3, ISL1, PITX1, PLAU, STRA6, TBX19                                                                                                                                                                                                                                                                                                      | 11 |
| Neurological Disease                                  | progressive motor neuropathy       | 3.45E-03 | AKAP7, CA12, CAPG, CHRM2, CPE (includes EG:12876), EFCAB4B, F2RL1, FAM172A, FER, GPC4, GREB1L, HIST1H3A (includes others), HLA-DMA, HOMER1, HTR2A, INSR, JHDM1D, KDM4C, KDM5A, KLHL29, LTBP2, MYO1D, NAMPT, ODZ2, PRKAR2B, RNF122, RPS6KA6, SH3GL2, SHROOM4, SNCAIP, TTC7A, WDFY3, ZNF652                                                                                 | 33 |
| Cardiovascular System Development and Function        | vasoconstriction                   | 3.57E-03 | ADM, AGTR1, F2RL1, HTR2A, PLAU                                                                                                                                                                                                                                                                                                                                            | 5  |
| Skeletal and Muscular Disorders                       | arthritis                          | 3.62E-03 | ADAMTS5, ADM, ANKRD12, ATP9A, AUTS2, BDKRB2, CCBE1, CPE (includes EG:12876), CXCL14, DMXL1, DOK6, F2RL1, FBN1, FCGR2B, FCHO2, GAN, GCA, GPC4, HLA-DMA, HOXC4, HPSE2, HSPG2, HTR2A, IL11RA, KCNB2, LAMA3, LRRC2, MAGI1 (includes EG:14924), MAPK1IP1L, MYCBP2, NAMPT, ODZ2, PAPP, PLAU, PRKAR2B, RASSF8, SBF2, SGCD, SH3GL2, SORL1, SYNE1, TBX19, TIMP4, TNS1, TTC7A, WNK1 | 46 |
| Connective Tissue Disorders                           | arthritis                          | 3.62E-03 | ADAMTS5, ADM, ANKRD12, ATP9A, AUTS2, BDKRB2, CCBE1, CPE (includes EG:12876), CXCL14, DMXL1, DOK6, F2RL1, FBN1, FCGR2B, FCHO2, GAN, GCA, GPC4, HLA-DMA, HOXC4, HPSE2, HSPG2, HTR2A, IL11RA, KCNB2, LAMA3, LRRC2, MAGI1 (includes EG:14924), MAPK1IP1L, MYCBP2, NAMPT, ODZ2, PAPP, PLAU, PRKAR2B, RASSF8, SBF2, SGCD, SH3GL2, SORL1, SYNE1, TBX19, TIMP4, TNS1, TTC7A, WNK1 | 46 |
| Inflammatory Disease                                  | arthritis                          | 3.62E-03 | ADAMTS5, ADM, ANKRD12, ATP9A, AUTS2, BDKRB2, CCBE1, CPE (includes EG:12876), CXCL14, DMXL1, DOK6, F2RL1, FBN1, FCGR2B, FCHO2, GAN, GCA, GPC4, HLA-DMA, HOXC4, HPSE2, HSPG2, HTR2A, IL11RA, KCNB2, LAMA3, LRRC2, MAGI1 (includes EG:14924), MAPK1IP1L, MYCBP2, NAMPT, ODZ2, PAPP, PLAU, PRKAR2B, RASSF8, SBF2, SGCD, SH3GL2, SORL1, SYNE1, TBX19, TIMP4, TNS1, TTC7A, WNK1 | 46 |
| Tissue Development                                    | cartilage development              | 3.73E-03 | HOXB3, HOXC4, MSX1, PITX1, SATB2, SIX2                                                                                                                                                                                                                                                                                                                                    | 6  |

|                                                       |                                         |          |                                                                                                                                                                                                            |    |
|-------------------------------------------------------|-----------------------------------------|----------|------------------------------------------------------------------------------------------------------------------------------------------------------------------------------------------------------------|----|
| Skeletal and Muscular System Development and Function | cartilage development                   | 3.73E-03 | HOXB3, HOXC4, MSX1, PITX1, SATB2, SIX2                                                                                                                                                                     | 6  |
| Connective Tissue Development and Function            | cartilage development                   | 3.73E-03 | HOXB3, HOXC4, MSX1, PITX1, SATB2, SIX2                                                                                                                                                                     | 6  |
| Tissue Development                                    | morphogenesis of tissue                 | 3.77E-03 | EYA1, FOXF1, HOXA13, HOXB2, HOXB3, INSIG2, INSR, MEOX2, MSX1, TBX4                                                                                                                                         | 10 |
| Reproductive System Disease                           | gynecological disorder                  | 3.82E-03 | ADAMTS5, ADARB1, ALDH1A1, ARL4C, ARSE, ASB5, C7orf68, CLDN7, CXCL14, DYRK2, FBN1, H2AFY, HMGA2, HOXB2, HOXB5, HOXB6, INSR, LRRN4, MFAP3L, MSX1, NCAM1, NLRP1, ODC1, PDK4, PLAU, POSTN, SATB2, SMG1, SNCAIP | 29 |
| Cancer                                                | uterine leiomyoma                       | 3.88E-03 | ADARB1, ALDH1A1, ARSE, ASB5, CXCL14, DYRK2, FBN1, MFAP3L, PDK4, SMG1                                                                                                                                       | 10 |
| Reproductive System Disease                           | uterine leiomyoma                       | 3.88E-03 | ADARB1, ALDH1A1, ARSE, ASB5, CXCL14, DYRK2, FBN1, MFAP3L, PDK4, SMG1                                                                                                                                       | 10 |
| Renal and Urological Disease                          | glomerulosclerosis                      | 4.01E-03 | ADM, AGTR1, BDKRB2, TRPC6                                                                                                                                                                                  | 4  |
| Embryonic Development                                 | transformation of embryonic cell lines  | 4.02E-03 | ADM, MXI1, ODC1                                                                                                                                                                                            | 3  |
| Cancer                                                | transformation of embryonic cell lines  | 4.02E-03 | ADM, MXI1, ODC1                                                                                                                                                                                            | 3  |
| Embryonic Development                                 | cellularity of organ                    | 4.02E-03 | DLL4, HOXB3, RBL2 (includes EG:100331892)                                                                                                                                                                  | 3  |
| Organ Development                                     | cellularity of organ                    | 4.02E-03 | DLL4, HOXB3, RBL2 (includes EG:100331892)                                                                                                                                                                  | 3  |
| Organismal Development                                | cellularity of organ                    | 4.02E-03 | DLL4, HOXB3, RBL2 (includes EG:100331892)                                                                                                                                                                  | 3  |
| Cell Morphology                                       | cellularity of organ                    | 4.02E-03 | DLL4, HOXB3, RBL2 (includes EG:100331892)                                                                                                                                                                  | 3  |
| Behavior                                              | behavior                                | 4.03E-03 | ADM, AGTR1, ARSA, CHRM2, CRIP2, F2RL1, GAL, GLRB, HOMER1, HTR2A, INSIG2, OPHN1, PLAU, PRKAR2B, PRSS1/PRSS3, PTN, STRA6                                                                                     | 17 |
| Cancer                                                | transformation of fibroblast cell lines | 4.11E-03 | ADM, HMGA2, HTR2A, KIFAP3, MITF, MXI1, ODC1, PTN, RBL2 (includes EG:100331892), WNT2                                                                                                                       | 10 |
| Genetic Disorder                                      | x-linked hereditary disease             | 4.18E-03 | ARSE, CA12, CXCL14, GPC4, HOMER1, IL11RA, OFD1, OPHN1, SHROOM4                                                                                                                                             | 9  |
| Genetic Disorder                                      | cleft face                              | 4.37E-03 | INSIG2, MSX1                                                                                                                                                                                               | 2  |
| Developmental Disorder                                | cleft face                              | 4.37E-03 | INSIG2, MSX1                                                                                                                                                                                               | 2  |
| Skeletal and Muscular Disorders                       | cleft face                              | 4.37E-03 | INSIG2, MSX1                                                                                                                                                                                               | 2  |
| Tissue Development                                    | development of adrenal gland            | 4.57E-03 | HMGA2, PLAU, STRA6                                                                                                                                                                                         | 3  |

|                                           |                                  |          |                                                                                                            |    |
|-------------------------------------------|----------------------------------|----------|------------------------------------------------------------------------------------------------------------|----|
| Embryonic Development                     | development of adrenal gland     | 4.57E-03 | HMGA2, PLAU, STRA6                                                                                         | 3  |
| Organ Development                         | development of adrenal gland     | 4.57E-03 | HMGA2, PLAU, STRA6                                                                                         | 3  |
| Organismal Development                    | development of adrenal gland     | 4.57E-03 | HMGA2, PLAU, STRA6                                                                                         | 3  |
| Endocrine System Development and Function | development of adrenal gland     | 4.57E-03 | HMGA2, PLAU, STRA6                                                                                         | 3  |
| Carbohydrate Metabolism                   | uptake of carbohydrate           | 5.02E-03 | ADM, BDKRB2, CXCL14, GPAM, INSR, PDK4, PLAU, SLC23A2, SLC27A1                                              | 9  |
| Embryonic Development                     | morphogenesis of embryo          | 5.08E-03 | EN1, HOXA13, LRP4, MSX1, PITX1, TBX4, ZEB2                                                                 | 7  |
| Organismal Development                    | morphogenesis of embryo          | 5.08E-03 | EN1, HOXA13, LRP4, MSX1, PITX1, TBX4, ZEB2                                                                 | 7  |
| Organismal Injury and Abnormalities       | edema                            | 5.30E-03 | BDKRB2, CA12, CHRM2, F2RL1, GAL, HTR2A, PLAU, PRSS1/PRSS3                                                  | 8  |
| Lipid Metabolism                          | oxidation of retinaldehyde       | 5.77E-03 | ALDH1A1, AOX1                                                                                              | 2  |
| Small Molecule Biochemistry               | oxidation of retinaldehyde       | 5.77E-03 | ALDH1A1, AOX1                                                                                              | 2  |
| Energy Production                         | oxidation of retinaldehyde       | 5.77E-03 | ALDH1A1, AOX1                                                                                              | 2  |
| Vitamin and Mineral Metabolism            | oxidation of retinaldehyde       | 5.77E-03 | ALDH1A1, AOX1                                                                                              | 2  |
| Post-Translational Modification           | heterotetramerization of protein | 5.77E-03 | ALDOC, INSR                                                                                                | 2  |
| Protein Synthesis                         | heterotetramerization of protein | 5.77E-03 | ALDOC, INSR                                                                                                | 2  |
| Cancer                                    | ovarian cancer                   | 5.77E-03 | ALDH1A1, ARL4C, C7orf68, CLDN7, CXCL14, H2AFY, HMGA2, HOXB2, HOXB5, HOXB6, LRRN4, MSX1, NCAM1, PLAU, POSTN | 15 |
| Reproductive System Disease               | ovarian cancer                   | 5.77E-03 | ALDH1A1, ARL4C, C7orf68, CLDN7, CXCL14, H2AFY, HMGA2, HOXB2, HOXB5, HOXB6, LRRN4, MSX1, NCAM1, PLAU, POSTN | 15 |
| Immunological Disease                     | angioedema                       | 5.81E-03 | BDKRB2, CHRM2, HTR2A                                                                                       | 3  |
| Organismal Injury and Abnormalities       | angioedema                       | 5.81E-03 | BDKRB2, CHRM2, HTR2A                                                                                       | 3  |
| Dermatological Diseases and Conditions    | angioedema                       | 5.81E-03 | BDKRB2, CHRM2, HTR2A                                                                                       | 3  |

|                                           |                                  |          |                                                                                                                                                                                                                       |    |
|-------------------------------------------|----------------------------------|----------|-----------------------------------------------------------------------------------------------------------------------------------------------------------------------------------------------------------------------|----|
| Cancer                                    | genital tumor                    | 6.15E-03 | AGTR1, ALDH1A1, ARL4C, C7orf68, CLDN7, CXCL14, GPRC5A, H2AFY, HMGA2, HOXB2, HOXB5, HOXB6, HOXC4, HOXC5, INSR, KCNK2, LRRN4, MSX1, MXI1, NCAM1, ODC1, PEAK1, PLAU, POSTN, PTCH2, RARRES1, RBL2 (includes EG:100331892) | 27 |
| Reproductive System Disease               | genital tumor                    | 6.15E-03 | AGTR1, ALDH1A1, ARL4C, C7orf68, CLDN7, CXCL14, GPRC5A, H2AFY, HMGA2, HOXB2, HOXB5, HOXB6, HOXC4, HOXC5, INSR, KCNK2, LRRN4, MSX1, MXI1, NCAM1, ODC1, PEAK1, PLAU, POSTN, PTCH2, RARRES1, RBL2 (includes EG:100331892) | 27 |
| Lipid Metabolism                          | formation of acylglycerol        | 6.35E-03 | BDKRB2, GPAM, NCAM1, PLAU, SLC27A1                                                                                                                                                                                    | 5  |
| Small Molecule Biochemistry               | formation of acylglycerol        | 6.35E-03 | BDKRB2, GPAM, NCAM1, PLAU, SLC27A1                                                                                                                                                                                    | 5  |
| Lipid Metabolism                          | biosynthesis of acylglycerol     | 6.35E-03 | BDKRB2, GPAM, NCAM1, PLAU, SLC27A1                                                                                                                                                                                    | 5  |
| Small Molecule Biochemistry               | biosynthesis of acylglycerol     | 6.35E-03 | BDKRB2, GPAM, NCAM1, PLAU, SLC27A1                                                                                                                                                                                    | 5  |
| Tissue Development                        | organization of tissue           | 6.43E-03 | CCDC80, FOXF1, FOXF2, HSPG2, LAMB2, OLFML2B, POSTN, XIRP1                                                                                                                                                             | 8  |
| Small Molecule Biochemistry               | quantity of inositol phosphate   | 6.50E-03 | BDKRB2, GAL, GNAZ                                                                                                                                                                                                     | 3  |
| Molecular Transport                       | quantity of inositol phosphate   | 6.50E-03 | BDKRB2, GAL, GNAZ                                                                                                                                                                                                     | 3  |
| Carbohydrate Metabolism                   | quantity of inositol phosphate   | 6.50E-03 | BDKRB2, GAL, GNAZ                                                                                                                                                                                                     | 3  |
| Lipid Metabolism                          | production of acylglycerol       | 6.70E-03 | BDKRB2, GPAM, NCAM1, PLAU, SLC27A1                                                                                                                                                                                    | 5  |
| Small Molecule Biochemistry               | production of acylglycerol       | 6.70E-03 | BDKRB2, GPAM, NCAM1, PLAU, SLC27A1                                                                                                                                                                                    | 5  |
| Molecular Transport                       | quantity of Ca <sup>2+</sup>     | 7.02E-03 | ADM, AGTR1, BDKRB2, CHRM2, F2RL1, GAL, HTR2A, INSR, MYCBP2, NCAM1, PLAU, PRSS1/PRSS3, RASGRP3, TRPC6                                                                                                                  | 14 |
| Vitamin and Mineral Metabolism            | quantity of Ca <sup>2+</sup>     | 7.02E-03 | ADM, AGTR1, BDKRB2, CHRM2, F2RL1, GAL, HTR2A, INSR, MYCBP2, NCAM1, PLAU, PRSS1/PRSS3, RASGRP3, TRPC6                                                                                                                  | 14 |
| Cell Signaling                            | quantity of Ca <sup>2+</sup>     | 7.02E-03 | ADM, AGTR1, BDKRB2, CHRM2, F2RL1, GAL, HTR2A, INSR, MYCBP2, NCAM1, PLAU, PRSS1/PRSS3, RASGRP3, TRPC6                                                                                                                  | 14 |
| Organ Development                         | function of organ                | 7.03E-03 | ADM, FBN1, HOMER1, HSPG2, INSR, MITF                                                                                                                                                                                  | 6  |
| Lipid Metabolism                          | metabolism of triacylglycerol    | 7.05E-03 | CPS1, GK, GPAM, INSIG2, SLC27A1                                                                                                                                                                                       | 5  |
| Small Molecule Biochemistry               | metabolism of triacylglycerol    | 7.05E-03 | CPS1, GK, GPAM, INSIG2, SLC27A1                                                                                                                                                                                       | 5  |
| Tissue Development                        | development of epithelial tissue | 7.17E-03 | ADM, ANGPTL4, DLL4, FOXF1, HOXA13, HOXB2, LAMA3, MEOX2, MITF, ODC1, TBX4, WNT2                                                                                                                                        | 12 |
| Endocrine System Development and Function | insulin sensitivity              | 7.23E-03 | ADM, GAL, SLC27A1                                                                                                                                                                                                     | 3  |



|                                                       |                               |          |                                                                                                                                                                                                                                                                                                             |    |
|-------------------------------------------------------|-------------------------------|----------|-------------------------------------------------------------------------------------------------------------------------------------------------------------------------------------------------------------------------------------------------------------------------------------------------------------|----|
| Organismal Development                                | density of blood vessel       | 7.30E-03 | BDKRB2, DLL4, HOXB3, MEOX2                                                                                                                                                                                                                                                                                  | 4  |
| Tissue Morphology                                     | density of blood vessel       | 7.30E-03 | BDKRB2, DLL4, HOXB3, MEOX2                                                                                                                                                                                                                                                                                  | 4  |
| Cardiovascular System Development and Function        | density of blood vessel       | 7.30E-03 | BDKRB2, DLL4, HOXB3, MEOX2                                                                                                                                                                                                                                                                                  | 4  |
| Skeletal and Muscular System Development and Function | development of axial skeleton | 7.35E-03 | HOXC8, MEOX2                                                                                                                                                                                                                                                                                                | 2  |
| Lipid Metabolism                                      | deposition of triacylglycerol | 7.35E-03 | GPAM, SLC27A1                                                                                                                                                                                                                                                                                               | 2  |
| Small Molecule Biochemistry                           | deposition of triacylglycerol | 7.35E-03 | GPAM, SLC27A1                                                                                                                                                                                                                                                                                               | 2  |
| Molecular Transport                                   | deposition of triacylglycerol | 7.35E-03 | GPAM, SLC27A1                                                                                                                                                                                                                                                                                               | 2  |
| Cell Death                                            | condensation of cells         | 7.35E-03 | EMP1, HOXA13                                                                                                                                                                                                                                                                                                | 2  |
| Molecular Transport                                   | quantity of metal             | 7.43E-03 | ADM, AGTR1, BDKRB2, CHRM2, F2RL1, GAL, HTR2A, INSR, MYCBP2, NCAM1, PLAU, PRSS1/PRSS3, RASGRP3, TRPC6, WNK1                                                                                                                                                                                                  | 15 |
| Carbohydrate Metabolism                               | uptake of monosaccharide      | 7.51E-03 | ADM, BDKRB2, CXCL14, GPAM, INSR, PDK4, PLAU, SLC27A1                                                                                                                                                                                                                                                        | 8  |
| Skeletal and Muscular Disorders                       | rheumatoid arthritis          | 7.71E-03 | ADM, ANKRD12, ATP9A, AUTS2, BDKRB2, CCBE1, CXCL14, DMXL1, DOK6, F2RL1, FBN1, FCGR2B, FCHO2, GAN, GCA, GPC4, HLA-DMA, HOXC4, HPSE2, HTR2A, KCNB2, LAMA3, LRRC2, MAGI1 (includes EG:14924), MAPK1IP1L, MYCBP2, NAMPT, ODZ2, PAPP, PRKAR2B, RASSF8, SBF2, SGCD, SH3GL2, SORL1, SYNE1, TBX19, TNS1, TTC7A, WNK1 | 40 |
| Immunological Disease                                 | rheumatoid arthritis          | 7.71E-03 | ADM, ANKRD12, ATP9A, AUTS2, BDKRB2, CCBE1, CXCL14, DMXL1, DOK6, F2RL1, FBN1, FCGR2B, FCHO2, GAN, GCA, GPC4, HLA-DMA, HOXC4, HPSE2, HTR2A, KCNB2, LAMA3, LRRC2, MAGI1 (includes EG:14924), MAPK1IP1L, MYCBP2, NAMPT, ODZ2, PAPP, PRKAR2B, RASSF8, SBF2, SGCD, SH3GL2, SORL1, SYNE1, TBX19, TNS1, TTC7A, WNK1 | 40 |
| Connective Tissue Disorders                           | rheumatoid arthritis          | 7.71E-03 | ADM, ANKRD12, ATP9A, AUTS2, BDKRB2, CCBE1, CXCL14, DMXL1, DOK6, F2RL1, FBN1, FCGR2B, FCHO2, GAN, GCA, GPC4, HLA-DMA, HOXC4, HPSE2, HTR2A, KCNB2, LAMA3, LRRC2, MAGI1 (includes EG:14924), MAPK1IP1L, MYCBP2, NAMPT, ODZ2, PAPP, PRKAR2B, RASSF8, SBF2, SGCD, SH3GL2, SORL1, SYNE1, TBX19, TNS1, TTC7A, WNK1 | 40 |
| Inflammatory Disease                                  | rheumatoid arthritis          | 7.71E-03 | ADM, ANKRD12, ATP9A, AUTS2, BDKRB2, CCBE1, CXCL14, DMXL1, DOK6, F2RL1, FBN1, FCGR2B, FCHO2, GAN, GCA, GPC4, HLA-DMA, HOXC4, HPSE2, HTR2A, KCNB2, LAMA3, LRRC2, MAGI1 (includes EG:14924), MAPK1IP1L, MYCBP2, NAMPT, ODZ2, PAPP, PRKAR2B, RASSF8, SBF2, SGCD, SH3GL2, SORL1, SYNE1, TBX19, TNS1, TTC7A, WNK1 | 40 |

|                                                       |                                  |          |                                                                                                                                                           |    |
|-------------------------------------------------------|----------------------------------|----------|-----------------------------------------------------------------------------------------------------------------------------------------------------------|----|
| Organismal Development                                | development of vessel            | 7.77E-03 | ADM, AGTR1, ANGPTL4, BDKRB2, CXCL14, DLL4, F2RL1, FBN1, FOXF1, HOXA13, HOXB3, HTATIP2, INSR, MEOX2, ODC1, PLAU, RBL2 (includes EG:100331892), STRA6, WNT2 | 19 |
| Cell Cycle                                            | ploidy of epithelial cell lines  | 8.01E-03 | DYRK2, PDK3, WNK1                                                                                                                                         | 3  |
| Cardiovascular Disease                                | bradycardia                      | 8.01E-03 | AGTR1, CHRM2, HTR2A                                                                                                                                       | 3  |
| Behavior                                              | memory                           | 8.13E-03 | CHRM2, GAL, HOMER1, HTR2A, NCAM1, OPHN1, PLAU                                                                                                             | 7  |
| Nervous System Development and Function               | memory                           | 8.13E-03 | CHRM2, GAL, HOMER1, HTR2A, NCAM1, OPHN1, PLAU                                                                                                             | 7  |
| Small Molecule Biochemistry                           | production of inositol phosphate | 8.33E-03 | AGTR1, CHRM2, GAL, HTR2A                                                                                                                                  | 4  |
| Carbohydrate Metabolism                               | production of inositol phosphate | 8.33E-03 | AGTR1, CHRM2, GAL, HTR2A                                                                                                                                  | 4  |
| Embryonic Development                                 | morphogenesis of limb            | 8.61E-03 | EN1, HOXA13, LRP4, MSX1, PITX1, TBX4                                                                                                                      | 6  |
| Organismal Development                                | morphogenesis of limb            | 8.61E-03 | EN1, HOXA13, LRP4, MSX1, PITX1, TBX4                                                                                                                      | 6  |
| Skeletal and Muscular System Development and Function | morphogenesis of limb            | 8.61E-03 | EN1, HOXA13, LRP4, MSX1, PITX1, TBX4                                                                                                                      | 6  |
| Embryonic Development                                 | invasion of embryonic cell lines | 9.10E-03 | ODC1, POSTN                                                                                                                                               | 2  |
| Cellular Movement                                     | invasion of embryonic cell lines | 9.10E-03 | ODC1, POSTN                                                                                                                                               | 2  |
| Organismal Development                                | area of vessel component         | 9.10E-03 | PAPPA, PLAU                                                                                                                                               | 2  |
| Lymphoid Tissue Structure and Development             | area of vessel component         | 9.10E-03 | PAPPA, PLAU                                                                                                                                               | 2  |
| Nervous System Development and Function               | reflex                           | 9.71E-03 | CPE (includes EG:12876), GLRB, PLAU                                                                                                                       | 3  |
| Embryonic Development                                 | limb development                 | 1.02E-02 | EN1, HOXA13, LRP4, MEOX2, MSX1, PITX1, TBX4                                                                                                               | 7  |
| Organismal Development                                | limb development                 | 1.02E-02 | EN1, HOXA13, LRP4, MEOX2, MSX1, PITX1, TBX4                                                                                                               | 7  |
| Skeletal and Muscular System Development and Function | limb development                 | 1.02E-02 | EN1, HOXA13, LRP4, MEOX2, MSX1, PITX1, TBX4                                                                                                               | 7  |
| Tissue Development                                    | neuritogenesis of cells          | 1.06E-02 | NCAM1, PLAU, PTN                                                                                                                                          | 3  |

|                                           |                                 |          |                                                                                                                                    |    |
|-------------------------------------------|---------------------------------|----------|------------------------------------------------------------------------------------------------------------------------------------|----|
| Nervous System Development and Function   | neuritogenesis of cells         | 1.06E-02 | NCAM1, PLAU, PTN                                                                                                                   | 3  |
| Cellular Assembly and Organization        | neuritogenesis of cells         | 1.06E-02 | NCAM1, PLAU, PTN                                                                                                                   | 3  |
| Cellular Development                      | neuritogenesis of cells         | 1.06E-02 | NCAM1, PLAU, PTN                                                                                                                   | 3  |
| Cancer                                    | benign tumor                    | 1.07E-02 | ADARB1, ADM, ALDH1A1, ALDOC, ARSE, ASB5, CXCL14, DYRK2, FBN1, GAL, HMGA2, HOXC5, INSR, ISOC1, MFAP3L, ODC1, PDK4, PLAU, SMG1, ZEB2 | 20 |
| Neurological Disease                      | heat hyperalgesia               | 1.10E-02 | F2RL1, PRSS1/PRSS3                                                                                                                 | 2  |
| Lipid Metabolism                          | esterification of fatty acid    | 1.10E-02 | GK, SLC27A1                                                                                                                        | 2  |
| Small Molecule Biochemistry               | esterification of fatty acid    | 1.10E-02 | GK, SLC27A1                                                                                                                        | 2  |
| Tissue Development                        | development of hindgut          | 1.10E-02 | ALDH1A1, HOXA13                                                                                                                    | 2  |
| Embryonic Development                     | development of hindgut          | 1.10E-02 | ALDH1A1, HOXA13                                                                                                                    | 2  |
| Organismal Development                    | development of hindgut          | 1.10E-02 | ALDH1A1, HOXA13                                                                                                                    | 2  |
| Neurological Disease                      | damage of axons                 | 1.10E-02 | F2RL1, IL11RA                                                                                                                      | 2  |
| Tissue Development                        | development of embryonic tissue | 1.11E-02 | ALDH1A1, EN1, EYA1, FOXF1, HOXA13, HOXB2, INSR, MEOX2, MITF, MSX1, PITX1, SIX2, STRA6                                              | 13 |
| Embryonic Development                     | development of embryonic tissue | 1.11E-02 | ALDH1A1, EN1, EYA1, FOXF1, HOXA13, HOXB2, INSR, MEOX2, MITF, MSX1, PITX1, SIX2, STRA6                                              | 13 |
| Organismal Development                    | development of embryonic tissue | 1.11E-02 | ALDH1A1, EN1, EYA1, FOXF1, HOXA13, HOXB2, INSR, MEOX2, MITF, MSX1, PITX1, SIX2, STRA6                                              | 13 |
| Embryonic Development                     | tooth development               | 1.27E-02 | BCOR, ISL1, LRP4, PLAU                                                                                                             | 4  |
| Organ Development                         | tooth development               | 1.27E-02 | BCOR, ISL1, LRP4, PLAU                                                                                                             | 4  |
| Organismal Development                    | tooth development               | 1.27E-02 | BCOR, ISL1, LRP4, PLAU                                                                                                             | 4  |
| Digestive System Development and Function | tooth development               | 1.27E-02 | BCOR, ISL1, LRP4, PLAU                                                                                                             | 4  |
| Metabolic Disease                         | hyperlipidemia                  | 1.27E-02 | CA12, GPAM, HTR2A, INSIG2                                                                                                          | 4  |
| Cardiovascular Disease                    | hyperlipidemia                  | 1.27E-02 | CA12, GPAM, HTR2A, INSIG2                                                                                                          | 4  |
| Gastrointestinal Disease                  | hyperinsulinism                 | 1.27E-02 | CPE (includes EG:12876), CXCL14, GPAM, INSR                                                                                        | 4  |
| Metabolic Disease                         | hyperinsulinism                 | 1.27E-02 | CPE (includes EG:12876), CXCL14, GPAM, INSR                                                                                        | 4  |
| Endocrine System Disorders                | hyperinsulinism                 | 1.27E-02 | CPE (includes EG:12876), CXCL14, GPAM, INSR                                                                                        | 4  |

|                                                |                                        |          |                                                                                                                                                     |    |
|------------------------------------------------|----------------------------------------|----------|-----------------------------------------------------------------------------------------------------------------------------------------------------|----|
| Metabolic Disease                              | dyslipidemia                           | 1.30E-02 | AGTR1, ANGPTL4, CA12, HTR2A, INSR                                                                                                                   | 5  |
| Hematological Disease                          | dyslipidemia                           | 1.30E-02 | AGTR1, ANGPTL4, CA12, HTR2A, INSR                                                                                                                   | 5  |
| Cardiovascular Disease                         | diastolic dysfunction                  | 1.31E-02 | AGTR1, SLC27A1                                                                                                                                      | 2  |
| Cardiovascular System Development and Function | vasoconstriction of blood vessel       | 1.34E-02 | ADM, AGTR1, HTR2A, PLAU                                                                                                                             | 4  |
| Psychological Disorders                        | anorexia                               | 1.37E-02 | ADM, HTR2A, IL11RA                                                                                                                                  | 3  |
| Nutritional Disease                            | anorexia                               | 1.37E-02 | ADM, HTR2A, IL11RA                                                                                                                                  | 3  |
| Organismal Development                         | development of blood vessel            | 1.47E-02 | ADM, AGTR1, ANGPTL4, BDKRB2, CXCL14, DLL4, F2RL1, FOXF1, HOXA13, HOXB3, HTATIP2, INSR, MEOX2, ODC1, PLAU, RBL2 (includes EG:100331892), STRA6, WNT2 | 18 |
| Cardiovascular System Development and Function | development of blood vessel            | 1.47E-02 | ADM, AGTR1, ANGPTL4, BDKRB2, CXCL14, DLL4, F2RL1, FOXF1, HOXA13, HOXB3, HTATIP2, INSR, MEOX2, ODC1, PLAU, RBL2 (includes EG:100331892), STRA6, WNT2 | 18 |
| Developmental Disorder                         | virilization                           | 1.48E-02 | INSR                                                                                                                                                | 1  |
| Reproductive System Disease                    | virilization                           | 1.48E-02 | INSR                                                                                                                                                | 1  |
| Organismal Development                         | vasodilation of basilar artery         | 1.48E-02 | KCNK2                                                                                                                                               | 1  |
| Tissue Morphology                              | vasodilation of basilar artery         | 1.48E-02 | KCNK2                                                                                                                                               | 1  |
| Cardiovascular System Development and Function | vasodilation of basilar artery         | 1.48E-02 | KCNK2                                                                                                                                               | 1  |
| Organismal Development                         | vasodilation of abdominal aorta        | 1.48E-02 | ADM                                                                                                                                                 | 1  |
| Tissue Morphology                              | vasodilation of abdominal aorta        | 1.48E-02 | ADM                                                                                                                                                 | 1  |
| Cardiovascular System Development and Function | vasodilation of abdominal aorta        | 1.48E-02 | ADM                                                                                                                                                 | 1  |
| Cardiovascular System Development and Function | vasoconstriction of aortic ring tissue | 1.48E-02 | PLAU                                                                                                                                                | 1  |
| Lipid Metabolism                               | utilization of triacylglycerol         | 1.48E-02 | ANGPTL4                                                                                                                                             | 1  |
| Small Molecule Biochemistry                    | utilization of triacylglycerol         | 1.48E-02 | ANGPTL4                                                                                                                                             | 1  |
| Lipid Metabolism                               | uptake of vitamin A                    | 1.48E-02 | STRA6                                                                                                                                               | 1  |

|                                                |                                               |          |        |   |
|------------------------------------------------|-----------------------------------------------|----------|--------|---|
| Small Molecule Biochemistry                    | uptake of vitamin A                           | 1.48E-02 | STRA6  | 1 |
| Molecular Transport                            | uptake of vitamin A                           | 1.48E-02 | STRA6  | 1 |
| Vitamin and Mineral Metabolism                 | uptake of vitamin A                           | 1.48E-02 | STRA6  | 1 |
| Cancer                                         | tumorigenesis of lipoma                       | 1.48E-02 | HMGA2  | 1 |
| Gastrointestinal Disease                       | tumorigenesis of colorectal adenocarcinoma    | 1.48E-02 | B3GNT6 | 1 |
| Cancer                                         | tumorigenesis of colorectal adenocarcinoma    | 1.48E-02 | B3GNT6 | 1 |
| Digestive System Development and Function      | thickness of colon                            | 1.48E-02 | F2RL1  | 1 |
| Organ Morphology                               | thickness of colon                            | 1.48E-02 | F2RL1  | 1 |
| Behavior                                       | taste aversion learning                       | 1.48E-02 | PLAU   | 1 |
| Cellular Assembly and Organization             | targeting of plasma membrane                  | 1.48E-02 | AKAP7  | 1 |
| Cell-To-Cell Signaling and Interaction         | targeting of plasma membrane                  | 1.48E-02 | AKAP7  | 1 |
| Cell-To-Cell Signaling and Interaction         | targeting of B lymphocytes                    | 1.48E-02 | FCGR2B | 1 |
| Cardiovascular System Development and Function | synthesis of neointima                        | 1.48E-02 | AGTR1  | 1 |
| Nervous System Development and Function        | synaptic transmission of glutamatergic neuron | 1.48E-02 | GAL    | 1 |
| Cell-To-Cell Signaling and Interaction         | synaptic transmission of glutamatergic neuron | 1.48E-02 | GAL    | 1 |
| Connective Tissue Development and Function     | survival of odontoblasts                      | 1.48E-02 | MSX1   | 1 |
| Cell Death                                     | survival of odontoblasts                      | 1.48E-02 | MSX1   | 1 |
| Tissue Development                             | survival of dental pulp                       | 1.48E-02 | MSX1   | 1 |
| Small Molecule Biochemistry                    | suppression of cyclic GMP                     | 1.48E-02 | ADM    | 1 |
| Nucleic Acid Metabolism                        | suppression of cyclic GMP                     | 1.48E-02 | ADM    | 1 |

|                                             |                                |          |       |   |
|---------------------------------------------|--------------------------------|----------|-------|---|
| Cardiovascular Disease                      | stenosis of blood vessel lumen | 1.48E-02 | PLAU  | 1 |
| Organismal Injury and Abnormalities         | stenosis of blood vessel lumen | 1.48E-02 | PLAU  | 1 |
| Tissue Development                          | size of thyroid lobe           | 1.48E-02 | EYA1  | 1 |
| Embryonic Development                       | size of thyroid lobe           | 1.48E-02 | EYA1  | 1 |
| Organ Development                           | size of thyroid lobe           | 1.48E-02 | EYA1  | 1 |
| Organismal Development                      | size of thyroid lobe           | 1.48E-02 | EYA1  | 1 |
| Organ Morphology                            | size of thyroid lobe           | 1.48E-02 | EYA1  | 1 |
| Endocrine System Development and Function   | size of thyroid lobe           | 1.48E-02 | EYA1  | 1 |
| Cancer                                      | signet ring-cell carcinoma     | 1.48E-02 | HMGA2 | 1 |
| Skeletal and Muscular Disorders             | shortening of rib 13           | 1.48E-02 | EN1   | 1 |
| Connective Tissue Disorders                 | shortening of rib 13           | 1.48E-02 | EN1   | 1 |
| Organ Morphology                            | relaxation of trachea          | 1.48E-02 | F2RL1 | 1 |
| Respiratory System Development and Function | relaxation of trachea          | 1.48E-02 | F2RL1 | 1 |
| Digestive System Development and Function   | relaxation of ileum            | 1.48E-02 | ADM   | 1 |
| Organ Morphology                            | relaxation of ileum            | 1.48E-02 | ADM   | 1 |
| Organ Morphology                            | relaxation of bronchus         | 1.48E-02 | F2RL1 | 1 |
| Respiratory System Development and Function | relaxation of bronchus         | 1.48E-02 | F2RL1 | 1 |
| Tissue Morphology                           | relaxation of bronchial tissue | 1.48E-02 | F2RL1 | 1 |
| Respiratory System Development and Function | relaxation of bronchial tissue | 1.48E-02 | F2RL1 | 1 |
| Organ Morphology                            | relaxation of bronchia         | 1.48E-02 | CHRM2 | 1 |
| Respiratory System Development and Function | relaxation of bronchia         | 1.48E-02 | CHRM2 | 1 |
| Tissue Morphology                           | regression of artery           | 1.48E-02 | DLL4  | 1 |

|                                                      |                                                        |          |         |   |
|------------------------------------------------------|--------------------------------------------------------|----------|---------|---|
| Cancer                                               | recurrence of squamous-cell carcinoma                  | 1.48E-02 | HMGA2   | 1 |
| Cellular Function and Maintenance                    | reabsorption of chloride                               | 1.48E-02 | SORL1   | 1 |
| Molecular Transport                                  | reabsorption of chloride                               | 1.48E-02 | SORL1   | 1 |
| Nervous System Development and Function              | quantity of postsynaptic density                       | 1.48E-02 | NCAM1   | 1 |
| Cellular Assembly and Organization                   | quantity of postsynaptic density                       | 1.48E-02 | NCAM1   | 1 |
| Cellular Assembly and Organization                   | quantity of microfibrils                               | 1.48E-02 | HSPG2   | 1 |
| Lipid Metabolism                                     | production of 11-cis-retinol                           | 1.48E-02 | SLC27A1 | 1 |
| Small Molecule Biochemistry                          | production of 11-cis-retinol                           | 1.48E-02 | SLC27A1 | 1 |
| Vitamin and Mineral Metabolism                       | production of 11-cis-retinol                           | 1.48E-02 | SLC27A1 | 1 |
| Endocrine System Development and Function            | polarity of islet cells                                | 1.48E-02 | NCAM1   | 1 |
| Cell Morphology                                      | polarity of islet cells                                | 1.48E-02 | NCAM1   | 1 |
| Gastrointestinal Disease                             | pineal hyperplasia insulin-resistant diabetes mellitus | 1.48E-02 | INSR    | 1 |
| Metabolic Disease                                    | pineal hyperplasia insulin-resistant diabetes mellitus | 1.48E-02 | INSR    | 1 |
| Endocrine System Disorders                           | pineal hyperplasia insulin-resistant diabetes mellitus | 1.48E-02 | INSR    | 1 |
| Genetic Disorder                                     | pineal hyperplasia insulin-resistant diabetes mellitus | 1.48E-02 | INSR    | 1 |
| Renal and Urological System Development and Function | perfusion pressure of kidney                           | 1.48E-02 | ADM     | 1 |
| Cellular Function and Maintenance                    | paired-pulse facilitation of hippocampal CA1 region    | 1.48E-02 | OPHN1   | 1 |

|                                                       |                                                     |          |        |   |
|-------------------------------------------------------|-----------------------------------------------------|----------|--------|---|
| Nervous System Development and Function               | paired-pulse facilitation of hippocampal CA1 region | 1.48E-02 | OPHN1  | 1 |
| Cellular Compromise                                   | oxidative stress response of heart cell lines       | 1.48E-02 | NAMPT  | 1 |
| Genetic Disorder                                      | otofaciocervical syndrome                           | 1.48E-02 | EYA1   | 1 |
| Neurological Disease                                  | otofaciocervical syndrome                           | 1.48E-02 | EYA1   | 1 |
| Developmental Disorder                                | otofaciocervical syndrome                           | 1.48E-02 | EYA1   | 1 |
| Genetic Disorder                                      | orofaciodigital syndrome                            | 1.48E-02 | OFD1   | 1 |
| Developmental Disorder                                | orofaciodigital syndrome                            | 1.48E-02 | OFD1   | 1 |
| Skeletal and Muscular Disorders                       | orofaciodigital syndrome                            | 1.48E-02 | OFD1   | 1 |
| Cell Death                                            | necrosis of skeletal muscle                         | 1.48E-02 | SGCD   | 1 |
| Organ Morphology                                      | necrosis of myocardium                              | 1.48E-02 | SGCD   | 1 |
| Cell Death                                            | necrosis of myocardium                              | 1.48E-02 | SGCD   | 1 |
| Tissue Development                                    | myogenesis of embryonic stem cell lines             | 1.48E-02 | HMGA2  | 1 |
| Embryonic Development                                 | myogenesis of embryonic stem cell lines             | 1.48E-02 | HMGA2  | 1 |
| Skeletal and Muscular System Development and Function | myogenesis of embryonic stem cell lines             | 1.48E-02 | HMGA2  | 1 |
| Cellular Development                                  | myogenesis of embryonic stem cell lines             | 1.48E-02 | HMGA2  | 1 |
| Inflammatory Response                                 | mobilization of macrophages                         | 1.48E-02 | CXCL14 | 1 |
| Cellular Movement                                     | mobilization of macrophages                         | 1.48E-02 | CXCL14 | 1 |
| Hematological System Development and Function         | mobilization of macrophages                         | 1.48E-02 | CXCL14 | 1 |
| Immune Cell Trafficking                               | mobilization of macrophages                         | 1.48E-02 | CXCL14 | 1 |
| Skeletal and Muscular System Development and Function | migration of osteoblasts                            | 1.48E-02 | PTN    | 1 |
| Connective Tissue Development and Function            | migration of osteoblasts                            | 1.48E-02 | PTN    | 1 |



|                                               |                                                    |          |         |   |
|-----------------------------------------------|----------------------------------------------------|----------|---------|---|
| Cellular Movement                             | migration of osteoblasts                           | 1.48E-02 | PTN     | 1 |
| Embryonic Development                         | migration of mesenchyme                            | 1.48E-02 | FOXF1   | 1 |
| Nervous System<br>Development and Function    | mass of adenohypophysis                            | 1.48E-02 | GAL     | 1 |
| Nervous System<br>Development and Function    | long-term potentiation of medial<br>perforant path | 1.48E-02 | GAL     | 1 |
| Cell-To-Cell Signaling and<br>Interaction     | long-term potentiation of medial<br>perforant path | 1.48E-02 | GAL     | 1 |
| Connective Tissue<br>Development and Function | lipolysis of white adipose tissue                  | 1.48E-02 | PRKAR2B | 1 |
| Tissue Morphology                             | lipolysis of white adipose tissue                  | 1.48E-02 | PRKAR2B | 1 |
| Lipid Metabolism                              | lipolysis of white adipose tissue                  | 1.48E-02 | PRKAR2B | 1 |
| Small Molecule Biochemistry                   | lipolysis of white adipose tissue                  | 1.48E-02 | PRKAR2B | 1 |
| Gastrointestinal Disease                      | lipotrophic diabetes                               | 1.48E-02 | INSR    | 1 |
| Metabolic Disease                             | lipotrophic diabetes                               | 1.48E-02 | INSR    | 1 |
| Endocrine System Disorders                    | lipotrophic diabetes                               | 1.48E-02 | INSR    | 1 |
| Cellular Development                          | lifespan of heart cell lines                       | 1.48E-02 | NAMPT   | 1 |
| Metabolic Disease                             | leprechaunism                                      | 1.48E-02 | INSR    | 1 |
| Genetic Disorder                              | leprechaunism                                      | 1.48E-02 | INSR    | 1 |
| Developmental Disorder                        | leprechaunism                                      | 1.48E-02 | INSR    | 1 |
| Genetic Disorder                              | laryngo-onychocutaneous<br>syndrome                | 1.48E-02 | LAMA3   | 1 |
| Developmental Disorder                        | laryngo-onychocutaneous<br>syndrome                | 1.48E-02 | LAMA3   | 1 |
| Dermatological Diseases and<br>Conditions     | laryngo-onychocutaneous<br>syndrome                | 1.48E-02 | LAMA3   | 1 |
| Molecular Transport                           | internalization of lipoprotein                     | 1.48E-02 | HSPG2   | 1 |
| Protein Trafficking                           | internalization of lipoprotein                     | 1.48E-02 | HSPG2   | 1 |

|                                        |                                                              |          |        |   |
|----------------------------------------|--------------------------------------------------------------|----------|--------|---|
| Gastrointestinal Disease               | insulin-resistant diabetes mellitus and acanthosis nigricans | 1.48E-02 | INSR   | 1 |
| Metabolic Disease                      | insulin-resistant diabetes mellitus and acanthosis nigricans | 1.48E-02 | INSR   | 1 |
| Endocrine System Disorders             | insulin-resistant diabetes mellitus and acanthosis nigricans | 1.48E-02 | INSR   | 1 |
| Genetic Disorder                       | insulin-resistant diabetes mellitus and acanthosis nigricans | 1.48E-02 | INSR   | 1 |
| Dermatological Diseases and Conditions | insulin-resistant diabetes mellitus and acanthosis nigricans | 1.48E-02 | INSR   | 1 |
| Genetic Disorder                       | hypoplastic enamel-onycholysis-hypohidrosis syndrome         | 1.48E-02 | MSX1   | 1 |
| Developmental Disorder                 | hypoplastic enamel-onycholysis-hypohidrosis syndrome         | 1.48E-02 | MSX1   | 1 |
| Dermatological Diseases and Conditions | hypoplastic enamel-onycholysis-hypohidrosis syndrome         | 1.48E-02 | MSX1   | 1 |
| Developmental Disorder                 | hypoplasia of calvaria                                       | 1.48E-02 | EN1    | 1 |
| Skeletal and Muscular Disorders        | hypoplasia of calvaria                                       | 1.48E-02 | EN1    | 1 |
| Connective Tissue Disorders            | hypoplasia of calvaria                                       | 1.48E-02 | EN1    | 1 |
| Endocrine System Disorders             | hypertrophy of pancreas                                      | 1.48E-02 | ODC1   | 1 |
| Developmental Disorder                 | hypertrophy of pancreas                                      | 1.48E-02 | ODC1   | 1 |
| Cancer                                 | hyperplasia of placenta                                      | 1.48E-02 | MPI    | 1 |
| Reproductive System Disease            | hyperplasia of placenta                                      | 1.48E-02 | MPI    | 1 |
| Lipid Metabolism                       | hydrolysis of sulfatides                                     | 1.48E-02 | ARSA   | 1 |
| Small Molecule Biochemistry            | hydrolysis of sulfatides                                     | 1.48E-02 | ARSA   | 1 |
| Genetic Disorder                       | hand-foot-uterus syndrome                                    | 1.48E-02 | HOXA13 | 1 |

|                                                       |                                           |          |        |   |
|-------------------------------------------------------|-------------------------------------------|----------|--------|---|
| Tissue Development                                    | growth of intestinal mucosa               | 1.48E-02 | ODC1   | 1 |
| Embryonic Development                                 | growth of hindlimb                        | 1.48E-02 | PITX1  | 1 |
| Organismal Development                                | growth of hindlimb                        | 1.48E-02 | PITX1  | 1 |
| Skeletal and Muscular System Development and Function | growth of hindlimb                        | 1.48E-02 | PITX1  | 1 |
| Tissue Development                                    | growth of cartilage tissue                | 1.48E-02 | SIX2   | 1 |
| Cellular Development                                  | growth of atypical lipomatous tumor cells | 1.48E-02 | HMGA2  | 1 |
| Cellular Growth and Proliferation                     | growth of atypical lipomatous tumor cells | 1.48E-02 | HMGA2  | 1 |
| Cancer                                                | growth of Wilms' tumor                    | 1.48E-02 | TIMP4  | 1 |
| Genetic Disorder                                      | giant axonal neuropathy 1                 | 1.48E-02 | GAN    | 1 |
| Neurological Disease                                  | giant axonal neuropathy 1                 | 1.48E-02 | GAN    | 1 |
| Organ Development                                     | function of urinary bladder               | 1.48E-02 | HOMER1 | 1 |
| Skeletal and Muscular Disorders                       | fragmentation of myofibrils               | 1.48E-02 | MEF2A  | 1 |
| Cardiovascular Disease                                | fragmentation of elastic membrane         | 1.48E-02 | PLAU   | 1 |
| Skeletal and Muscular System Development and Function | formation of junctional folds             | 1.48E-02 | LAMB2  | 1 |
| Cellular Assembly and Organization                    | formation of junctional folds             | 1.48E-02 | LAMB2  | 1 |
| Nervous System Development and Function               | formation of hippocampus                  | 1.48E-02 | ZEB2   | 1 |
| Nervous System Development and Function               | formation of active zone                  | 1.48E-02 | LAMB2  | 1 |
| Cellular Assembly and Organization                    | formation of active zone                  | 1.48E-02 | LAMB2  | 1 |
| Cellular Growth and Proliferation                     | formation of B cell lymphoma cells        | 1.48E-02 | MXI1   | 1 |
| Skeletal and Muscular System Development and Function | force generation of detrusor muscle       | 1.48E-02 | HOMER1 | 1 |

|                                           |                                                             |          |       |   |
|-------------------------------------------|-------------------------------------------------------------|----------|-------|---|
| Nervous System Development and Function   | excitation of cholinergic neurons                           | 1.48E-02 | GAL   | 1 |
| Cell-To-Cell Signaling and Interaction    | excitation of cholinergic neurons                           | 1.48E-02 | GAL   | 1 |
| Cellular Growth and Proliferation         | excitation of cholinergic neurons                           | 1.48E-02 | GAL   | 1 |
| Cellular Development                      | epithelial-mesenchymal transition of skin cancer cell lines | 1.48E-02 | ZEB2  | 1 |
| Tissue Morphology                         | enlargement of pericardium                                  | 1.48E-02 | DLL4  | 1 |
| Organ Morphology                          | enlargement of pericardium                                  | 1.48E-02 | DLL4  | 1 |
| Cellular Function and Maintenance         | endocytosis by keratinocytes                                | 1.48E-02 | F2RL1 | 1 |
| Genetic Disorder                          | ectopia lentis                                              | 1.48E-02 | FBN1  | 1 |
| Developmental Disorder                    | ectopia lentis                                              | 1.48E-02 | FBN1  | 1 |
| Ophthalmic Disease                        | ectopia lentis                                              | 1.48E-02 | FBN1  | 1 |
| Genetic Disorder                          | early onset glaucoma                                        | 1.48E-02 | SBF2  | 1 |
| Ophthalmic Disease                        | early onset glaucoma                                        | 1.48E-02 | SBF2  | 1 |
| Genetic Disorder                          | dyssegmental dysplasia, Silverman-Handmaker type            | 1.48E-02 | HSPG2 | 1 |
| Developmental Disorder                    | dyssegmental dysplasia, Silverman-Handmaker type            | 1.48E-02 | HSPG2 | 1 |
| Tissue Morphology                         | disruption of extracellular matrix                          | 1.48E-02 | PLAU  | 1 |
| Tissue Morphology                         | disintegration of epithelial tissue                         | 1.48E-02 | FOXF2 | 1 |
| Organismal Development                    | development of tunica media                                 | 1.48E-02 | FBN1  | 1 |
| Lymphoid Tissue Structure and Development | development of tunica media                                 | 1.48E-02 | FBN1  | 1 |
| Tissue Development                        | development of pineal gland                                 | 1.48E-02 | EN1   | 1 |
| Embryonic Development                     | development of pineal gland                                 | 1.48E-02 | EN1   | 1 |

|                                                       |                                  |          |       |   |
|-------------------------------------------------------|----------------------------------|----------|-------|---|
| Organ Development                                     | development of pineal gland      | 1.48E-02 | EN1   | 1 |
| Organismal Development                                | development of pineal gland      | 1.48E-02 | EN1   | 1 |
| Endocrine System Development and Function             | development of pineal gland      | 1.48E-02 | EN1   | 1 |
| Embryonic Development                                 | development of paw               | 1.48E-02 | EN1   | 1 |
| Organismal Development                                | development of paw               | 1.48E-02 | EN1   | 1 |
| Skeletal and Muscular System Development and Function | development of paw               | 1.48E-02 | EN1   | 1 |
| Tissue Development                                    | development of neuroretina cells | 1.48E-02 | MITF  | 1 |
| Embryonic Development                                 | development of neuroretina cells | 1.48E-02 | MITF  | 1 |
| Organismal Development                                | development of neuroretina cells | 1.48E-02 | MITF  | 1 |
| Cellular Development                                  | development of neuroretina cells | 1.48E-02 | MITF  | 1 |
| Tissue Development                                    | development of ilium             | 1.48E-02 | PITX1 | 1 |
| Skeletal and Muscular System Development and Function | development of ilium             | 1.48E-02 | PITX1 | 1 |
| Connective Tissue Development and Function            | development of ilium             | 1.48E-02 | PITX1 | 1 |
| Cellular Assembly and Organization                    | development of hemidesmosomes    | 1.48E-02 | LAMA3 | 1 |
| Tissue Development                                    | development of fibula            | 1.48E-02 | PITX1 | 1 |
| Embryonic Development                                 | development of fibula            | 1.48E-02 | PITX1 | 1 |
| Organismal Development                                | development of fibula            | 1.48E-02 | PITX1 | 1 |
| Skeletal and Muscular System Development and Function | development of fibula            | 1.48E-02 | PITX1 | 1 |
| Connective Tissue Development and Function            | development of fibula            | 1.48E-02 | PITX1 | 1 |

|                                               |                                                   |          |       |   |
|-----------------------------------------------|---------------------------------------------------|----------|-------|---|
| Tissue Development                            | development of colliculus                         | 1.48E-02 | EN1   | 1 |
| Embryonic Development                         | development of colliculus                         | 1.48E-02 | EN1   | 1 |
| Organ Development                             | development of colliculus                         | 1.48E-02 | EN1   | 1 |
| Organismal Development                        | development of colliculus                         | 1.48E-02 | EN1   | 1 |
| Nervous System<br>Development and Function    | development of colliculus                         | 1.48E-02 | EN1   | 1 |
| Cellular Assembly and<br>Organization         | development of cell-matrix<br>contacts            | 1.48E-02 | TNS1  | 1 |
| Cell-To-Cell Signaling and<br>Interaction     | development of cell-matrix<br>contacts            | 1.48E-02 | TNS1  | 1 |
| Tissue Development                            | development of ameloblasts                        | 1.48E-02 | LAMA3 | 1 |
| Connective Tissue<br>Development and Function | development of ameloblasts                        | 1.48E-02 | LAMA3 | 1 |
| Cellular Development                          | development of ameloblasts                        | 1.48E-02 | LAMA3 | 1 |
| Tissue Morphology                             | deterioration of basement<br>membrane             | 1.48E-02 | HSPG2 | 1 |
| Cell-To-Cell Signaling and<br>Interaction     | desensitization of<br>pheochromocytoma cell lines | 1.48E-02 | ADM   | 1 |
| Tissue Development                            | deposition of calvaria                            | 1.48E-02 | EN1   | 1 |
| Connective Tissue<br>Development and Function | deposition of calvaria                            | 1.48E-02 | EN1   | 1 |
| Small Molecule Biochemistry                   | depletion of putrescine                           | 1.48E-02 | ODC1  | 1 |
| Molecular Transport                           | depletion of putrescine                           | 1.48E-02 | ODC1  | 1 |
| Cellular Compromise                           | depletion of projection neurons                   | 1.48E-02 | ISL1  | 1 |
| Cellular Compromise                           | depletion of interneurons                         | 1.48E-02 | ISL1  | 1 |
| Cellular Movement                             | delay in withdrawal of neurons                    | 1.48E-02 | NCAM1 | 1 |
| Nervous System<br>Development and Function    | delay in withdrawal of neurons                    | 1.48E-02 | NCAM1 | 1 |
| Cellular Movement                             | delay in shift of cells                           | 1.48E-02 | EN1   | 1 |

|                                               |                                                                  |          |       |   |
|-----------------------------------------------|------------------------------------------------------------------|----------|-------|---|
| Cellular Function and Maintenance             | delay in regulation of T lymphocytes                             | 1.48E-02 | CBLB  | 1 |
| Hematological System Development and Function | delay in regulation of T lymphocytes                             | 1.48E-02 | CBLB  | 1 |
| Tissue Development                            | delay in multilayering of cells                                  | 1.48E-02 | EN1   | 1 |
| Cell Cycle                                    | delay in initiation of sub-G1 phase of salivary gland cell lines | 1.48E-02 | HMGA2 | 1 |
| Cell Cycle                                    | delay in initiation of G2/M phase of salivary gland cell lines   | 1.48E-02 | HMGA2 | 1 |
| Tissue Development                            | delay in formation of neural fold                                | 1.48E-02 | NCAM1 | 1 |
| Embryonic Development                         | delay in formation of neural fold                                | 1.48E-02 | NCAM1 | 1 |
| Organismal Development                        | delay in formation of neural fold                                | 1.48E-02 | NCAM1 | 1 |
| Cell Cycle                                    | delay in G1/S phase transition of pancreatic cancer cell lines   | 1.48E-02 | INSR  | 1 |
| Lipid Metabolism                              | degradation of gangliotetraosylceramide II3,IV3-disulfate        | 1.48E-02 | ARSA  | 1 |
| Small Molecule Biochemistry                   | degradation of gangliotetraosylceramide II3,IV3-disulfate        | 1.48E-02 | ARSA  | 1 |
| Metabolic Disease                             | deficiency of glycerol kinase                                    | 1.48E-02 | GK    | 1 |
| Genetic Disorder                              | deficiency of glycerol kinase                                    | 1.48E-02 | GK    | 1 |
| Developmental Disorder                        | deficiency of glycerol kinase                                    | 1.48E-02 | GK    | 1 |
| Developmental Disorder                        | dedifferentiation of myotube                                     | 1.48E-02 | MSX1  | 1 |
| Skeletal and Muscular Disorders               | dedifferentiation of myotube                                     | 1.48E-02 | MSX1  | 1 |
| Small Molecule Biochemistry                   | decarboxylation of L-ornithine                                   | 1.48E-02 | ODC1  | 1 |
| Post-Translational Modification               | decarboxylation of L-ornithine                                   | 1.48E-02 | ODC1  | 1 |

|                                            |                                                    |          |        |   |
|--------------------------------------------|----------------------------------------------------|----------|--------|---|
| Amino Acid Metabolism                      | decarboxylation of L-ornithine                     | 1.48E-02 | ODC1   | 1 |
| Gastrointestinal Disease                   | damage of large intestine                          | 1.48E-02 | CBLB   | 1 |
| Organismal Injury and Abnormalities        | damage of large intestine                          | 1.48E-02 | CBLB   | 1 |
| Genetic Disorder                           | congenital fibrosis of extraocular muscles         | 1.48E-02 | KIF21A | 1 |
| Developmental Disorder                     | congenital fibrosis of extraocular muscles         | 1.48E-02 | KIF21A | 1 |
| Skeletal and Muscular Disorders            | congenital fibrosis of extraocular muscles         | 1.48E-02 | KIF21A | 1 |
| Ophthalmic Disease                         | congenital fibrosis of extraocular muscles         | 1.48E-02 | KIF21A | 1 |
| Skeletal and Muscular Disorders            | collapse of diaphragm                              | 1.48E-02 | FBN1   | 1 |
| Respiratory Disease                        | collapse of diaphragm                              | 1.48E-02 | FBN1   | 1 |
| Cellular Assembly and Organization         | clustering of cell-cell contacts                   | 1.48E-02 | NCAM1  | 1 |
| Cell-To-Cell Signaling and Interaction     | clustering of cell-cell contacts                   | 1.48E-02 | NCAM1  | 1 |
| Genetic Disorder                           | chondrodysplasia punctata, x-linked recessive type | 1.48E-02 | ARSE   | 1 |
| Developmental Disorder                     | chondrodysplasia punctata, x-linked recessive type | 1.48E-02 | ARSE   | 1 |
| Skeletal and Muscular Disorders            | chondrodysplasia punctata, x-linked recessive type | 1.48E-02 | ARSE   | 1 |
| Connective Tissue Disorders                | chondrodysplasia punctata, x-linked recessive type | 1.48E-02 | ARSE   | 1 |
| Cancer                                     | chemosensitivity of melanoma cell lines            | 1.48E-02 | MITF   | 1 |
| Behavior                                   | chaining behavior of mice                          | 1.48E-02 | HOMER1 | 1 |
| Cell Death                                 | cell viability of salivary gland cell lines        | 1.48E-02 | HMGA2  | 1 |
| Connective Tissue Development and Function | cell spreading of dermal fibroblasts               | 1.48E-02 | FBN1   | 1 |



|                                                |                                                   |          |         |   |
|------------------------------------------------|---------------------------------------------------|----------|---------|---|
| Cell Morphology                                | cell spreading of dermal fibroblasts              | 1.48E-02 | FBN1    | 1 |
| Embryonic Development                          | cell death of mesodermal cells                    | 1.48E-02 | ISL1    | 1 |
| Cell Death                                     | cell death of mesodermal cells                    | 1.48E-02 | ISL1    | 1 |
| Metabolic Disease                              | carbamoyl-phosphate synthase i deficiency disease | 1.48E-02 | CPS1    | 1 |
| Genetic Disorder                               | carbamoyl-phosphate synthase i deficiency disease | 1.48E-02 | CPS1    | 1 |
| Developmental Disorder                         | carbamoyl-phosphate synthase i deficiency disease | 1.48E-02 | CPS1    | 1 |
| Tissue Development                             | calcification of myocardium                       | 1.48E-02 | SGCD    | 1 |
| Organismal Development                         | branching of artery                               | 1.48E-02 | DLL4    | 1 |
| Cardiovascular System Development and Function | branching of artery                               | 1.48E-02 | DLL4    | 1 |
| Cellular Development                           | branching of artery                               | 1.48E-02 | DLL4    | 1 |
| Lipid Metabolism                               | biosynthesis of phosphatidylglycerol              | 1.48E-02 | SLC27A1 | 1 |
| Small Molecule Biochemistry                    | biosynthesis of phosphatidylglycerol              | 1.48E-02 | SLC27A1 | 1 |
| Carbohydrate Metabolism                        | biosynthesis of phosphatidylglycerol              | 1.48E-02 | SLC27A1 | 1 |
| Small Molecule Biochemistry                    | biosynthesis of carbamoyl phosphate               | 1.48E-02 | CPS1    | 1 |
| Cell-To-Cell Signaling and Interaction         | binding of pheochromocytoma cell lines            | 1.48E-02 | LAMA3   | 1 |
| Gene Expression                                | binding of osteocalcin box                        | 1.48E-02 | MSX1    | 1 |
| Gene Expression                                | binding of E4f binding site                       | 1.48E-02 | HMGGA2  | 1 |
| Organismal Injury and Abnormalities            | autotomy of rats                                  | 1.48E-02 | GAL     | 1 |
| Cardiovascular Disease                         | atresia of aorta                                  | 1.48E-02 | DLL4    | 1 |

|                                                       |                                                        |          |        |   |
|-------------------------------------------------------|--------------------------------------------------------|----------|--------|---|
| Developmental Disorder                                | atresia of aorta                                       | 1.48E-02 | DLL4   | 1 |
| Cell-To-Cell Signaling and Interaction                | architecture of synapse                                | 1.48E-02 | LAMB2  | 1 |
| Cell Death                                            | apoptosis of urethra                                   | 1.48E-02 | HOXA13 | 1 |
| Cell Death                                            | apoptosis of atypical lipomatous tumor cells           | 1.48E-02 | HMGA2  | 1 |
| Inflammatory Response                                 | antibody-dependent cell-mediated cytotoxicity of PBMCs | 1.48E-02 | IL1RAP | 1 |
| Hematological System Development and Function         | antibody-dependent cell-mediated cytotoxicity of PBMCs | 1.48E-02 | IL1RAP | 1 |
| Cell-To-Cell Signaling and Interaction                | antibody-dependent cell-mediated cytotoxicity of PBMCs | 1.48E-02 | IL1RAP | 1 |
| Tissue Development                                    | angiogenesis of adductor muscle                        | 1.48E-02 | F2RL1  | 1 |
| Organismal Development                                | angiogenesis of adductor muscle                        | 1.48E-02 | F2RL1  | 1 |
| Skeletal and Muscular System Development and Function | angiogenesis of adductor muscle                        | 1.48E-02 | F2RL1  | 1 |
| Cardiovascular System Development and Function        | angiogenesis of adductor muscle                        | 1.48E-02 | F2RL1  | 1 |
| Neurological Disease                                  | allodynia of hindlimb                                  | 1.48E-02 | GAL    | 1 |
| Skeletal and Muscular Disorders                       | allodynia of hindlimb                                  | 1.48E-02 | GAL    | 1 |
| Metabolic Disease                                     | albinism-deafness syndrome of tietz                    | 1.48E-02 | MITF   | 1 |
| Genetic Disorder                                      | albinism-deafness syndrome of tietz                    | 1.48E-02 | MITF   | 1 |
| Developmental Disorder                                | albinism-deafness syndrome of tietz                    | 1.48E-02 | MITF   | 1 |
| Dermatological Diseases and Conditions                | albinism-deafness syndrome of tietz                    | 1.48E-02 | MITF   | 1 |
| Ophthalmic Disease                                    | albinism-deafness syndrome of tietz                    | 1.48E-02 | MITF   | 1 |
| Developmental Disorder                                | agenesis of mullerian duct                             | 1.48E-02 | HOXA13 | 1 |

|                                        |                                               |          |        |   |
|----------------------------------------|-----------------------------------------------|----------|--------|---|
| Cellular Assembly and Organization     | adhesion of cell surface                      | 1.48E-02 | NCAM1  | 1 |
| Cell-To-Cell Signaling and Interaction | adhesion of cell surface                      | 1.48E-02 | NCAM1  | 1 |
| Tissue Development                     | adhesion of cardiomyocytes                    | 1.48E-02 | POSTN  | 1 |
| Cell-To-Cell Signaling and Interaction | adhesion of cardiomyocytes                    | 1.48E-02 | POSTN  | 1 |
| Cell-To-Cell Signaling and Interaction | activation of fibrosarcoma cell lines         | 1.48E-02 | B3GNT6 | 1 |
| Small Molecule Biochemistry            | accumulation of spermine                      | 1.48E-02 | ODC1   | 1 |
| Molecular Transport                    | accumulation of spermine                      | 1.48E-02 | ODC1   | 1 |
| Small Molecule Biochemistry            | accumulation of spermidine                    | 1.48E-02 | ODC1   | 1 |
| Organismal Development                 | accumulation of cast                          | 1.48E-02 | ADM    | 1 |
| Genetic Disorder                       | Syndromic microphthalmia 9                    | 1.48E-02 | STRA6  | 1 |
| Developmental Disorder                 | Syndromic microphthalmia 9                    | 1.48E-02 | STRA6  | 1 |
| Ophthalmic Disease                     | Syndromic microphthalmia 9                    | 1.48E-02 | STRA6  | 1 |
| Genetic Disorder                       | Syndromic microphthalmia 2                    | 1.48E-02 | BCOR   | 1 |
| Developmental Disorder                 | Syndromic microphthalmia 2                    | 1.48E-02 | BCOR   | 1 |
| Ophthalmic Disease                     | Syndromic microphthalmia 2                    | 1.48E-02 | BCOR   | 1 |
| Genetic Disorder                       | Shprintzen-Goldberg craniosynostosis syndrome | 1.48E-02 | FBN1   | 1 |
| Developmental Disorder                 | Shprintzen-Goldberg craniosynostosis syndrome | 1.48E-02 | FBN1   | 1 |
| Genetic Disorder                       | Schwartz-Jampel syndrome type 1               | 1.48E-02 | HSPG2  | 1 |
| Skeletal and Muscular Disorders        | Schwartz-Jampel syndrome type 1               | 1.48E-02 | HSPG2  | 1 |
| Genetic Disorder                       | Pierson syndrome                              | 1.48E-02 | LAMB2  | 1 |
| Renal and Urological Disease           | Pierson syndrome                              | 1.48E-02 | LAMB2  | 1 |

|                                         |                                      |          |                         |   |
|-----------------------------------------|--------------------------------------|----------|-------------------------|---|
| Genetic Disorder                        | Mowat-Wilson syndrome                | 1.48E-02 | ZEB2                    | 1 |
| Neurological Disease                    | Mowat-Wilson syndrome                | 1.48E-02 | ZEB2                    | 1 |
| Cancer                                  | Merkel-cell carcinoma                | 1.48E-02 | NCAM1                   | 1 |
| Dermatological Diseases and Conditions  | Merkel-cell carcinoma                | 1.48E-02 | NCAM1                   | 1 |
| Genetic Disorder                        | Mass syndrome                        | 1.48E-02 | FBN1                    | 1 |
| Connective Tissue Disorders             | Mass syndrome                        | 1.48E-02 | FBN1                    | 1 |
| Genetic Disorder                        | Guttmacher syndrome                  | 1.48E-02 | HOXA13                  | 1 |
| Developmental Disorder                  | Guttmacher syndrome                  | 1.48E-02 | HOXA13                  | 1 |
| Skeletal and Muscular Disorders         | Guttmacher syndrome                  | 1.48E-02 | HOXA13                  | 1 |
| Genetic Disorder                        | Charcot-Marie-Tooth disease type 4j  | 1.48E-02 | FIG4                    | 1 |
| Neurological Disease                    | Charcot-Marie-Tooth disease type 4j  | 1.48E-02 | FIG4                    | 1 |
| Skeletal and Muscular Disorders         | Charcot-Marie-Tooth disease type 4j  | 1.48E-02 | FIG4                    | 1 |
| Genetic Disorder                        | Charcot-Marie-Tooth disease type 4b2 | 1.48E-02 | SBF2                    | 1 |
| Neurological Disease                    | Charcot-Marie-Tooth disease type 4b2 | 1.48E-02 | SBF2                    | 1 |
| Skeletal and Muscular Disorders         | Charcot-Marie-Tooth disease type 4b2 | 1.48E-02 | SBF2                    | 1 |
| Genetic Disorder                        | Branchio-Oto-Renal syndrome          | 1.48E-02 | EYA1                    | 1 |
| Embryonic Development                   | patterning of embryo                 | 1.49E-02 | EN1, LRP4, MEOX2, SATB2 | 4 |
| Organismal Development                  | patterning of embryo                 | 1.49E-02 | EN1, LRP4, MEOX2, SATB2 | 4 |
| Nervous System Development and Function | survival of spinal cord cells        | 1.53E-02 | IL11RA, PTN             | 2 |
| Cell Death                              | survival of spinal cord cells        | 1.53E-02 | IL11RA, PTN             | 2 |
| Cell Morphology                         | shape change of smooth muscle cells  | 1.53E-02 | FBN1, PLAU              | 2 |
| Lipid Metabolism                        | incorporation of oleic acid          | 1.53E-02 | GPAM, SLC27A1           | 2 |

|                                                       |                                |          |                                                                                                                                     |    |
|-------------------------------------------------------|--------------------------------|----------|-------------------------------------------------------------------------------------------------------------------------------------|----|
| Small Molecule Biochemistry                           | incorporation of oleic acid    | 1.53E-02 | GPAM, SLC27A1                                                                                                                       | 2  |
| Embryonic Development                                 | development of leg             | 1.53E-02 | PITX1, TBX4                                                                                                                         | 2  |
| Organismal Development                                | development of leg             | 1.53E-02 | PITX1, TBX4                                                                                                                         | 2  |
| Skeletal and Muscular System Development and Function | development of leg             | 1.53E-02 | PITX1, TBX4                                                                                                                         | 2  |
| Cell Morphology                                       | cell spreading of muscle cells | 1.53E-02 | FBN1, PLAU                                                                                                                          | 2  |
| Cancer                                                | hyperplasia                    | 1.54E-02 | AGTR1, CLDN7, HMGA2, IL1RAP, INSR, MPI, MXI1, ODC1, PLAU, POSTN, PRSS1/PRSS3, RBL2 (includes EG:100331892)                          | 12 |
| Cancer                                                | carcinoma in situ              | 1.56E-02 | AGTR1, GPRC5A, GPRC5C, HMGA2, KCNK2, PEAK1, RBL2 (includes EG:100331892)                                                            | 7  |
| Organismal Development                                | dilation of blood vessel       | 1.59E-02 | ADM, CPS1, F2RL1, KCNK2, PLAU                                                                                                       | 5  |
| Tissue Morphology                                     | dilation of blood vessel       | 1.59E-02 | ADM, CPS1, F2RL1, KCNK2, PLAU                                                                                                       | 5  |
| Cardiovascular System Development and Function        | dilation of blood vessel       | 1.59E-02 | ADM, CPS1, F2RL1, KCNK2, PLAU                                                                                                       | 5  |
| Tissue Development                                    | development of cranial nerve   | 1.60E-02 | EN1, HOXB3, ISL1                                                                                                                    | 3  |
| Nervous System Development and Function               | development of cranial nerve   | 1.60E-02 | EN1, HOXB3, ISL1                                                                                                                    | 3  |
| Lipid Metabolism                                      | oxidation of lipid             | 1.61E-02 | ACAA2, ALDH1A1, AOX1, GPAM, HSD17B2, INSR, SLC27A1                                                                                  | 7  |
| Small Molecule Biochemistry                           | oxidation of lipid             | 1.61E-02 | ACAA2, ALDH1A1, AOX1, GPAM, HSD17B2, INSR, SLC27A1                                                                                  | 7  |
| Energy Production                                     | oxidation of lipid             | 1.61E-02 | ACAA2, ALDH1A1, AOX1, GPAM, HSD17B2, INSR, SLC27A1                                                                                  | 7  |
| Organismal Development                                | vasculogenesis                 | 1.64E-02 | ADM, ANGPTL4, BDKRB2, CXCL14, DLL4, F2RL1, FOXF1, HOXA13, HOXB3, INSR, MEOX2, ODC1, PLAU, RBL2 (includes EG:100331892), STRA6, WNT2 | 16 |
| Cardiovascular System Development and Function        | vasculogenesis                 | 1.64E-02 | ADM, ANGPTL4, BDKRB2, CXCL14, DLL4, F2RL1, FOXF1, HOXA13, HOXB3, INSR, MEOX2, ODC1, PLAU, RBL2 (includes EG:100331892), STRA6, WNT2 | 16 |
| Psychological Disorders                               | eating disorder                | 1.65E-02 | ADM, CA12, CHRM2, HTR2A, IL11RA                                                                                                     | 5  |
| Nutritional Disease                                   | eating disorder                | 1.65E-02 | ADM, CA12, CHRM2, HTR2A, IL11RA                                                                                                     | 5  |
| Tissue Development                                    | development of intestine       | 1.72E-02 | FOXF1, FOXF2, HOXA13                                                                                                                | 3  |
| Embryonic Development                                 | development of intestine       | 1.72E-02 | FOXF1, FOXF2, HOXA13                                                                                                                | 3  |

|                                           |                                     |          |                                                                                                                                                                                                                    |    |
|-------------------------------------------|-------------------------------------|----------|--------------------------------------------------------------------------------------------------------------------------------------------------------------------------------------------------------------------|----|
| Organ Development                         | development of intestine            | 1.72E-02 | FOXF1, FOXF2, HOXA13                                                                                                                                                                                               | 3  |
| Organismal Development                    | development of intestine            | 1.72E-02 | FOXF1, FOXF2, HOXA13                                                                                                                                                                                               | 3  |
| Digestive System Development and Function | development of intestine            | 1.72E-02 | FOXF1, FOXF2, HOXA13                                                                                                                                                                                               | 3  |
| Metabolic Disease                         | albuminuria                         | 1.72E-02 | AGTR1, BDKRB2, LAMB2                                                                                                                                                                                               | 3  |
| Renal and Urological Disease              | albuminuria                         | 1.72E-02 | AGTR1, BDKRB2, LAMB2                                                                                                                                                                                               | 3  |
| Lipid Metabolism                          | production of retinoid              | 1.77E-02 | ALDH1A1, SLC27A1                                                                                                                                                                                                   | 2  |
| Small Molecule Biochemistry               | production of retinoid              | 1.77E-02 | ALDH1A1, SLC27A1                                                                                                                                                                                                   | 2  |
| Vitamin and Mineral Metabolism            | production of retinoid              | 1.77E-02 | ALDH1A1, SLC27A1                                                                                                                                                                                                   | 2  |
| Post-Translational Modification           | tetramerization of protein          | 1.83E-02 | ALDH1A1, ALDOC, INSR, SBF2                                                                                                                                                                                         | 4  |
| Protein Synthesis                         | tetramerization of protein          | 1.83E-02 | ALDH1A1, ALDOC, INSR, SBF2                                                                                                                                                                                         | 4  |
| Gastrointestinal Disease                  | inflammatory bowel disease          | 1.97E-02 | ANO4, AUTS2, B3GNT6, CA12, CPS1, EFCAB4B, F2RL1, FIG4, GALNT13, GLRB, GREB1L, HPSE2, KDM4C, KIFAP3, KLHL2, MEF2A, NBEAL1, ODZ2, PAPP, PLEKHA6, RASGRP3, RASSF8, SBF2, SGCD, SNCAIP, SYNE1, TET2, TEX9, WDFY3, ZEB2 | 30 |
| Genetic Disorder                          | inflammatory bowel disease          | 1.97E-02 | ANO4, AUTS2, B3GNT6, CA12, CPS1, EFCAB4B, F2RL1, FIG4, GALNT13, GLRB, GREB1L, HPSE2, KDM4C, KIFAP3, KLHL2, MEF2A, NBEAL1, ODZ2, PAPP, PLEKHA6, RASGRP3, RASSF8, SBF2, SGCD, SNCAIP, SYNE1, TET2, TEX9, WDFY3, ZEB2 | 30 |
| Inflammatory Disease                      | inflammatory bowel disease          | 1.97E-02 | ANO4, AUTS2, B3GNT6, CA12, CPS1, EFCAB4B, F2RL1, FIG4, GALNT13, GLRB, GREB1L, HPSE2, KDM4C, KIFAP3, KLHL2, MEF2A, NBEAL1, ODZ2, PAPP, PLEKHA6, RASGRP3, RASSF8, SBF2, SGCD, SNCAIP, SYNE1, TET2, TEX9, WDFY3, ZEB2 | 30 |
| Cellular Movement                         | migration of lung cancer cell lines | 1.98E-02 | HTATIP2, POSTN, PTN                                                                                                                                                                                                | 3  |
| Tissue Development                        | development of neurons              | 1.98E-02 | EN1, FIG4, MYCBP2, NCAM1, PLAU, PTN                                                                                                                                                                                | 6  |
| Nervous System Development and Function   | development of neurons              | 1.98E-02 | EN1, FIG4, MYCBP2, NCAM1, PLAU, PTN                                                                                                                                                                                | 6  |
| Cellular Development                      | development of neurons              | 1.98E-02 | EN1, FIG4, MYCBP2, NCAM1, PLAU, PTN                                                                                                                                                                                | 6  |
| Small Molecule Biochemistry               | disposal of D-glucose               | 2.02E-02 | GAL, INSR                                                                                                                                                                                                          | 2  |
| Carbohydrate Metabolism                   | disposal of D-glucose               | 2.02E-02 | GAL, INSR                                                                                                                                                                                                          | 2  |
| Genetic Disorder                          | Dupuytren contracture               | 2.11E-02 | ADAMTS5, COL12A1, COL8A1, TIMP4                                                                                                                                                                                    | 4  |

|                                                      |                                     |          |                                                                                                                                                                                                     |    |
|------------------------------------------------------|-------------------------------------|----------|-----------------------------------------------------------------------------------------------------------------------------------------------------------------------------------------------------|----|
| Connective Tissue Disorders                          | Dupuytren contracture               | 2.11E-02 | ADAMTS5, COL12A1, COL8A1, TIMP4                                                                                                                                                                     | 4  |
| Gastrointestinal Disease                             | Crohn's disease                     | 2.12E-02 | ANO4, AUTS2, CA12, CPS1, EFCAB4B, FIG4, GALNT13, GLRB, GREB1L, HPSE2, KDM4C, KIFAP3, KLHL2, MEF2A, NBEAL1, ODZ2, PAPP, PLEKHA6, RASGRP3, RASSF8, SBF2, SGCD, SNCAIP, SYNE1, TET2, TEX9, WDFY3, ZEB2 | 28 |
| Genetic Disorder                                     | Crohn's disease                     | 2.12E-02 | ANO4, AUTS2, CA12, CPS1, EFCAB4B, FIG4, GALNT13, GLRB, GREB1L, HPSE2, KDM4C, KIFAP3, KLHL2, MEF2A, NBEAL1, ODZ2, PAPP, PLEKHA6, RASGRP3, RASSF8, SBF2, SGCD, SNCAIP, SYNE1, TET2, TEX9, WDFY3, ZEB2 | 28 |
| Inflammatory Disease                                 | Crohn's disease                     | 2.12E-02 | ANO4, AUTS2, CA12, CPS1, EFCAB4B, FIG4, GALNT13, GLRB, GREB1L, HPSE2, KDM4C, KIFAP3, KLHL2, MEF2A, NBEAL1, ODZ2, PAPP, PLEKHA6, RASGRP3, RASSF8, SBF2, SGCD, SNCAIP, SYNE1, TET2, TEX9, WDFY3, ZEB2 | 28 |
| Tissue Development                                   | adhesion of kidney cell lines       | 2.12E-02 | PLAU, POSTN, ZEB2                                                                                                                                                                                   | 3  |
| Renal and Urological System Development and Function | adhesion of kidney cell lines       | 2.12E-02 | PLAU, POSTN, ZEB2                                                                                                                                                                                   | 3  |
| Cell-To-Cell Signaling and Interaction               | adhesion of kidney cell lines       | 2.12E-02 | PLAU, POSTN, ZEB2                                                                                                                                                                                   | 3  |
| Cardiovascular System Development and Function       | activation of endothelial cells     | 2.12E-02 | DLL4, MEOX2, PLAU                                                                                                                                                                                   | 3  |
| Cell-To-Cell Signaling and Interaction               | activation of endothelial cells     | 2.12E-02 | DLL4, MEOX2, PLAU                                                                                                                                                                                   | 3  |
| Cardiovascular System Development and Function       | angiogenesis                        | 2.16E-02 | AGTR1, ANGPTL4, BDKRB2, CXCL14, DLL4, F2RL1, HOXA13, HOXB3, HTATIP2, MEOX2, PLAU, RBL2 (includes EG:100331892), STRA6, TBX4, TRPC6                                                                  | 15 |
| Neurological Disease                                 | hyperalgesia                        | 2.21E-02 | ADM, F2RL1, PRSS1/PRSS3, TRPC6                                                                                                                                                                      | 4  |
| Cancer                                               | prostatic intraepithelial neoplasia | 2.23E-02 | AGTR1, GPRC5A, KCNK2, PEA1, RBL2 (includes EG:100331892)                                                                                                                                            | 5  |
| Genetic Disorder                                     | prostatic intraepithelial neoplasia | 2.23E-02 | AGTR1, GPRC5A, KCNK2, PEA1, RBL2 (includes EG:100331892)                                                                                                                                            | 5  |
| Reproductive System Disease                          | prostatic intraepithelial neoplasia | 2.23E-02 | AGTR1, GPRC5A, KCNK2, PEA1, RBL2 (includes EG:100331892)                                                                                                                                            | 5  |
| Tissue Development                                   | growth of embryonic tissue          | 2.26E-02 | F2RL1, INSR, PITX1                                                                                                                                                                                  | 3  |
| Embryonic Development                                | growth of embryonic tissue          | 2.26E-02 | F2RL1, INSR, PITX1                                                                                                                                                                                  | 3  |
| Embryonic Development                                | development of head                 | 2.26E-02 | EYA1, PITX1, STRA6                                                                                                                                                                                  | 3  |

|                                                |                                       |          |                                                                                                                                                                       |    |
|------------------------------------------------|---------------------------------------|----------|-----------------------------------------------------------------------------------------------------------------------------------------------------------------------|----|
| Organismal Development                         | development of head                   | 2.26E-02 | EYA1, PITX1, STRA6                                                                                                                                                    | 3  |
| Genetic Disorder                               | exfoliation syndrome                  | 2.29E-02 | FBN1, LTBP2                                                                                                                                                           | 2  |
| Ophthalmic Disease                             | exfoliation syndrome                  | 2.29E-02 | FBN1, LTBP2                                                                                                                                                           | 2  |
| Respiratory Disease                            | dyspnea                               | 2.29E-02 | CHRM2, HTR2A                                                                                                                                                          | 2  |
| Tissue Development                             | morphogenesis of eye                  | 2.31E-02 | ALDH1A1, ARHGAP35, COL8A1, MITF                                                                                                                                       | 4  |
| Embryonic Development                          | morphogenesis of eye                  | 2.31E-02 | ALDH1A1, ARHGAP35, COL8A1, MITF                                                                                                                                       | 4  |
| Organ Development                              | morphogenesis of eye                  | 2.31E-02 | ALDH1A1, ARHGAP35, COL8A1, MITF                                                                                                                                       | 4  |
| Organismal Development                         | morphogenesis of eye                  | 2.31E-02 | ALDH1A1, ARHGAP35, COL8A1, MITF                                                                                                                                       | 4  |
| Organ Morphology                               | morphogenesis of eye                  | 2.31E-02 | ALDH1A1, ARHGAP35, COL8A1, MITF                                                                                                                                       | 4  |
| Visual System Development and Function         | morphogenesis of eye                  | 2.31E-02 | ALDH1A1, ARHGAP35, COL8A1, MITF                                                                                                                                       | 4  |
| Cancer                                         | adenocarcinoma                        | 2.33E-02 | ADAMTSS5, ALDOC, ARL4C, B3GNT6, CLDN7, CXCL14, H2AFY, HMGA2, HTATIP2, KCNK2, LRRN4, MXI1, NLRP1, PLAU, RBL2 (includes EG:100331892), SATB2, SNCAIP                    | 17 |
| Tissue Development                             | quantity of actin stress fibers       | 2.41E-02 | INSR, LTBP2, PLAU                                                                                                                                                     | 3  |
| Cellular Assembly and Organization             | quantity of actin stress fibers       | 2.41E-02 | INSR, LTBP2, PLAU                                                                                                                                                     | 3  |
| Cell-To-Cell Signaling and Interaction         | quantity of actin stress fibers       | 2.41E-02 | INSR, LTBP2, PLAU                                                                                                                                                     | 3  |
| Tissue Development                             | eye development                       | 2.42E-02 | ALDH1A1, ANGPTL4, ARHGAP35, COL8A1, CXCL14, LAMB2, MITF, WNT2                                                                                                         | 8  |
| Embryonic Development                          | eye development                       | 2.42E-02 | ALDH1A1, ANGPTL4, ARHGAP35, COL8A1, CXCL14, LAMB2, MITF, WNT2                                                                                                         | 8  |
| Organ Development                              | eye development                       | 2.42E-02 | ALDH1A1, ANGPTL4, ARHGAP35, COL8A1, CXCL14, LAMB2, MITF, WNT2                                                                                                         | 8  |
| Organismal Development                         | eye development                       | 2.42E-02 | ALDH1A1, ANGPTL4, ARHGAP35, COL8A1, CXCL14, LAMB2, MITF, WNT2                                                                                                         | 8  |
| Visual System Development and Function         | eye development                       | 2.42E-02 | ALDH1A1, ANGPTL4, ARHGAP35, COL8A1, CXCL14, LAMB2, MITF, WNT2                                                                                                         | 8  |
| Cardiovascular System Development and Function | vasodilation                          | 2.48E-02 | ADM, CPS1, F2RL1, KCNK2, PLAU                                                                                                                                         | 5  |
| Gene Expression                                | activation of DNA endogenous promoter | 2.50E-02 | ARID4A, BCOR, BRWD1, EN1, F2RL1, FOXF1, FOXF2, HMGA2, HOXA13, HOXC5, HOXC8, HTATIP2, ISL1, JMY, KDM5A, MEF2A, MITF, MSX1, MXI1, NRBF2, PITX1, RLF, SATB2, SIX2, TBX19 | 25 |
| Tissue Development                             | mineralization of bone                | 2.52E-02 | BCOR, EN1, POSTN, PTN                                                                                                                                                 | 4  |



|                                                       |                                            |          |                                                                                                              |    |
|-------------------------------------------------------|--------------------------------------------|----------|--------------------------------------------------------------------------------------------------------------|----|
| Skeletal and Muscular System Development and Function | mineralization of bone                     | 2.52E-02 | BCOR, EN1, POSTN, PTN                                                                                        | 4  |
| Connective Tissue Development and Function            | mineralization of bone                     | 2.52E-02 | BCOR, EN1, POSTN, PTN                                                                                        | 4  |
| Organismal Injury and Abnormalities                   | fibrosis of organ                          | 2.52E-02 | AGTR1, BDKRB2, FCGR2B, IL11RA, PLAU, POSTN, SGCD                                                             | 7  |
| Carbohydrate Metabolism                               | quantity of carbohydrate                   | 2.53E-02 | ADM, BDKRB2, CPE (includes EG:12876), FCGR2B, FIG4, GAL, GNAZ, GPAM, INSR, PLAU                              | 10 |
| Cellular Development                                  | growth of endocrine cells                  | 2.57E-02 | C8orf4, INSR                                                                                                 | 2  |
| Cellular Growth and Proliferation                     | growth of endocrine cells                  | 2.57E-02 | C8orf4, INSR                                                                                                 | 2  |
| Tissue Development                                    | development of branchial arch              | 2.57E-02 | MEOX2, PITX1                                                                                                 | 2  |
| Embryonic Development                                 | development of branchial arch              | 2.57E-02 | MEOX2, PITX1                                                                                                 | 2  |
| Organismal Development                                | development of branchial arch              | 2.57E-02 | MEOX2, PITX1                                                                                                 | 2  |
| Genetic Disorder                                      | allergic rhinoconjunctivitis               | 2.57E-02 | CHRM2, HTR2A                                                                                                 | 2  |
| Immunological Disease                                 | allergic rhinoconjunctivitis               | 2.57E-02 | CHRM2, HTR2A                                                                                                 | 2  |
| Inflammatory Disease                                  | allergic rhinoconjunctivitis               | 2.57E-02 | CHRM2, HTR2A                                                                                                 | 2  |
| Respiratory Disease                                   | allergic rhinoconjunctivitis               | 2.57E-02 | CHRM2, HTR2A                                                                                                 | 2  |
| Genetic Disorder                                      | anaphylaxis                                | 2.57E-02 | CHRM2, FCGR2B, HTR2A                                                                                         | 3  |
| Immunological Disease                                 | anaphylaxis                                | 2.57E-02 | CHRM2, FCGR2B, HTR2A                                                                                         | 3  |
| Tissue Development                                    | morphogenesis of embryonic tissue          | 2.65E-02 | EYA1, FOXF1, HOXA13, INSR, MEOX2                                                                             | 5  |
| Embryonic Development                                 | morphogenesis of embryonic tissue          | 2.65E-02 | EYA1, FOXF1, HOXA13, INSR, MEOX2                                                                             | 5  |
| Organismal Development                                | morphogenesis of embryonic tissue          | 2.65E-02 | EYA1, FOXF1, HOXA13, INSR, MEOX2                                                                             | 5  |
| Cellular Development                                  | differentiation of connective tissue cells | 2.71E-02 | ADM, C10orf58, FCGR2B, HMGA2, HSPG2, INSR, MITF, NAMPT, PLAU, POSTN, PTN, RBL2 (includes EG:100331892), TOB2 | 13 |
| Tissue Morphology                                     | relaxation of artery                       | 2.72E-02 | ADM, F2RL1, GAL                                                                                              | 3  |
| Cardiovascular System Development and Function        | relaxation of artery                       | 2.72E-02 | ADM, F2RL1, GAL                                                                                              | 3  |

|                                                       |                                           |          |                                                                                                                      |    |
|-------------------------------------------------------|-------------------------------------------|----------|----------------------------------------------------------------------------------------------------------------------|----|
| Tissue Development                                    | morphogenesis of skeletal system          | 2.72E-02 | HOXB2, HOXC8, TBX4                                                                                                   | 3  |
| Skeletal and Muscular System Development and Function | morphogenesis of skeletal system          | 2.72E-02 | HOXB2, HOXC8, TBX4                                                                                                   | 3  |
| Connective Tissue Development and Function            | morphogenesis of skeletal system          | 2.72E-02 | HOXB2, HOXC8, TBX4                                                                                                   | 3  |
| Lipid Metabolism                                      | esterification of lipid                   | 2.72E-02 | AGTR1, GK, SLC27A1                                                                                                   | 3  |
| Small Molecule Biochemistry                           | esterification of lipid                   | 2.72E-02 | AGTR1, GK, SLC27A1                                                                                                   | 3  |
| Embryonic Development                                 | cell movement of embryonic cell lines     | 2.74E-02 | AGTR1, FOXF1, PLAU, POSTN                                                                                            | 4  |
| Cellular Movement                                     | cell movement of embryonic cell lines     | 2.74E-02 | AGTR1, FOXF1, PLAU, POSTN                                                                                            | 4  |
| Developmental Disorder                                | hypoplasia                                | 2.74E-02 | EN1, EYA1, FOXF1, FOXF2, HOXA13                                                                                      | 5  |
| Lipid Metabolism                                      | cleavage of lipid                         | 2.77E-02 | ACAA2, ADM, ARSA, BDKRB2, CHRM2, F2RL1, HTR2A                                                                        | 7  |
| Small Molecule Biochemistry                           | cleavage of lipid                         | 2.77E-02 | ACAA2, ADM, ARSA, BDKRB2, CHRM2, F2RL1, HTR2A                                                                        | 7  |
| Genetic Disorder                                      | psoriasis                                 | 2.80E-02 | ADM, DKK2, FAR2, GAL, GK, H2AFY, IL20RB, MT1L, NAMPT, ODC1, PITX1, PLAU, POSTN, PRSS1/PRSS3, RAB38, RARRES1, SLC23A2 | 17 |
| Dermatological Diseases and Conditions                | psoriasis                                 | 2.80E-02 | ADM, DKK2, FAR2, GAL, GK, H2AFY, IL20RB, MT1L, NAMPT, ODC1, PITX1, PLAU, POSTN, PRSS1/PRSS3, RAB38, RARRES1, SLC23A2 | 17 |
| Cell Morphology                                       | morphology of intercellular junctions     | 2.86E-02 | LAMB2, NCAM1                                                                                                         | 2  |
| Cell-To-Cell Signaling and Interaction                | morphology of intercellular junctions     | 2.86E-02 | LAMB2, NCAM1                                                                                                         | 2  |
| Cellular Movement                                     | migration of pancreatic cancer cell lines | 2.86E-02 | PEAK1, PLAU                                                                                                          | 2  |
| Embryonic Development                                 | cellularity of lymphoid organ             | 2.86E-02 | DLL4, RBL2 (includes EG:100331892)                                                                                   | 2  |
| Organ Development                                     | cellularity of lymphoid organ             | 2.86E-02 | DLL4, RBL2 (includes EG:100331892)                                                                                   | 2  |
| Organismal Development                                | cellularity of lymphoid organ             | 2.86E-02 | DLL4, RBL2 (includes EG:100331892)                                                                                   | 2  |
| Cell Morphology                                       | cellularity of lymphoid organ             | 2.86E-02 | DLL4, RBL2 (includes EG:100331892)                                                                                   | 2  |
| Tissue Development                                    | adhesion of muscle cells                  | 2.86E-02 | PLAU, POSTN                                                                                                          | 2  |
| Cell-To-Cell Signaling and Interaction                | adhesion of muscle cells                  | 2.86E-02 | PLAU, POSTN                                                                                                          | 2  |

|                                                       |                                           |          |                           |   |
|-------------------------------------------------------|-------------------------------------------|----------|---------------------------|---|
| Tissue Development                                    | development of skeletal muscle            | 2.86E-02 | F2RL1, MEOX2, PLAU, STRA6 | 4 |
| Skeletal and Muscular System Development and Function | development of skeletal muscle            | 2.86E-02 | F2RL1, MEOX2, PLAU, STRA6 | 4 |
| Cellular Movement                                     | cell movement of epithelial cell lines    | 2.86E-02 | AGTR1, LAMA3, PLAU, POSTN | 4 |
| Hair and Skin Development and Function                | cell movement of epithelial cell lines    | 2.86E-02 | AGTR1, LAMA3, PLAU, POSTN | 4 |
| Dermatological Diseases and Conditions                | senile lentigo                            | 2.89E-02 | ANKRD12, FAR2, GAL        | 3 |
| Gastrointestinal Disease                              | oral submucous fibrosis                   | 2.89E-02 | C7orf68, NAMPT, SLC27A6   | 3 |
| Organismal Injury and Abnormalities                   | oral submucous fibrosis                   | 2.89E-02 | C7orf68, NAMPT, SLC27A6   | 3 |
| Organ Morphology                                      | vasodilation of kidney                    | 2.94E-02 | ADM                       | 1 |
| Cardiovascular System Development and Function        | vasodilation of kidney                    | 2.94E-02 | ADM                       | 1 |
| Renal and Urological System Development and Function  | vasodilation of kidney                    | 2.94E-02 | ADM                       | 1 |
| Cell Morphology                                       | vacuolation of tubulovesicular structures | 2.94E-02 | SH3GL2                    | 1 |
| Lipid Metabolism                                      | uptake of linoleic acid                   | 2.94E-02 | SLC27A6                   | 1 |
| Small Molecule Biochemistry                           | uptake of linoleic acid                   | 2.94E-02 | SLC27A6                   | 1 |
| Molecular Transport                                   | uptake of linoleic acid                   | 2.94E-02 | SLC27A6                   | 1 |
| Cancer                                                | tumorigenesis of endothelial cells        | 2.94E-02 | ANGPTL4                   | 1 |
| Cancer                                                | tumorigenesis of colon carcinoma cells    | 2.94E-02 | PITX1                     | 1 |
| Cancer                                                | transformation of thyroid cells           | 2.94E-02 | HMGA2                     | 1 |
| Lipid Metabolism                                      | toxicity of retinol                       | 2.94E-02 | ALDH1A1                   | 1 |
| Small Molecule Biochemistry                           | toxicity of retinol                       | 2.94E-02 | ALDH1A1                   | 1 |
| Vitamin and Mineral Metabolism                        | toxicity of retinol                       | 2.94E-02 | ALDH1A1                   | 1 |
| Tissue Morphology                                     | thickness of skin tissue                  | 2.94E-02 | ODC1                      | 1 |

|                                                       |                                            |          |       |   |
|-------------------------------------------------------|--------------------------------------------|----------|-------|---|
| Hair and Skin Development and Function                | thickness of skin tissue                   | 2.94E-02 | ODC1  | 1 |
| Cellular Assembly and Organization                    | targeting of mossy fibers                  | 2.94E-02 | EN1   | 1 |
| Cell-To-Cell Signaling and Interaction                | stimulation of pheochromocytoma cell lines | 2.94E-02 | NCAM1 | 1 |
| Cellular Growth and Proliferation                     | stimulation of pheochromocytoma cell lines | 2.94E-02 | NCAM1 | 1 |
| Tissue Development                                    | size of motor endplates                    | 2.94E-02 | NCAM1 | 1 |
| Skeletal and Muscular System Development and Function | size of motor endplates                    | 2.94E-02 | NCAM1 | 1 |
| Nervous System Development and Function               | size of motor endplates                    | 2.94E-02 | NCAM1 | 1 |
| Cell Morphology                                       | size of motor endplates                    | 2.94E-02 | NCAM1 | 1 |
| Cellular Assembly and Organization                    | size of motor endplates                    | 2.94E-02 | NCAM1 | 1 |
| Cell-To-Cell Signaling and Interaction                | size of motor endplates                    | 2.94E-02 | NCAM1 | 1 |
| Metabolic Disease                                     | severe familial insulin resistance         | 2.94E-02 | INSR  | 1 |
| Genetic Disorder                                      | severe familial insulin resistance         | 2.94E-02 | INSR  | 1 |
| Cell Cycle                                            | senescence of heart cell lines             | 2.94E-02 | NAMPT | 1 |
| Small Molecule Biochemistry                           | secretion of aldesleukin                   | 2.94E-02 | GPAM  | 1 |
| Molecular Transport                                   | secretion of aldesleukin                   | 2.94E-02 | GPAM  | 1 |
| Genetic Disorder                                      | sclerosteosis                              | 2.94E-02 | LRP4  | 1 |
| Developmental Disorder                                | sclerosteosis                              | 2.94E-02 | LRP4  | 1 |
| Skeletal and Muscular Disorders                       | sclerosteosis                              | 2.94E-02 | LRP4  | 1 |
| Cardiovascular Disease                                | rupture of aneurysm                        | 2.94E-02 | FBN1  | 1 |
| Organismal Injury and Abnormalities                   | rupture of aneurysm                        | 2.94E-02 | FBN1  | 1 |

|                                                       |                                               |          |                              |   |
|-------------------------------------------------------|-----------------------------------------------|----------|------------------------------|---|
| Skeletal and Muscular System Development and Function | ruffling of smooth muscle cells               | 2.94E-02 | PLAU                         | 1 |
| Cell Morphology                                       | ruffling of smooth muscle cells               | 2.94E-02 | PLAU                         | 1 |
| Inflammatory Response                                 | ruffling of macrophages                       | 2.94E-02 | CAPG                         | 1 |
| Hematological System Development and Function         | ruffling of macrophages                       | 2.94E-02 | CAPG                         | 1 |
| Cell Morphology                                       | ruffling of macrophages                       | 2.94E-02 | CAPG                         | 1 |
| Antigen Presentation                                  | ruffling of macrophages                       | 2.94E-02 | CAPG                         | 1 |
| Cell Morphology                                       | ruffling of epithelial cell lines             | 2.94E-02 | INSR                         | 1 |
| Hair and Skin Development and Function                | ruffling of epithelial cell lines             | 2.94E-02 | INSR                         | 1 |
| Tissue Morphology                                     | relaxation of femoral artery                  | 2.94E-02 | F2RL1                        | 1 |
| Cardiovascular System Development and Function        | relaxation of femoral artery                  | 2.94E-02 | F2RL1                        | 1 |
| Small Molecule Biochemistry                           | regulation of spermidine                      | 2.94E-02 | ODC1                         | 1 |
| Cardiovascular Disease                                | rarefaction of vasculature                    | 2.94E-02 | PLAU                         | 1 |
| Small Molecule Biochemistry                           | quantity of heparin                           | 2.94E-02 | PLAU                         | 1 |
| Molecular Transport                                   | quantity of heparin                           | 2.94E-02 | PLAU                         | 1 |
| Carbohydrate Metabolism                               | quantity of heparin                           | 2.94E-02 | PLAU                         | 1 |
| Drug Metabolism                                       | quantity of heparin                           | 2.94E-02 | PLAU                         | 1 |
| Nervous System Development and Function               | proliferation of motor neurons                | 2.94E-02 | ISL1                         | 1 |
| Cellular Growth and Proliferation                     | proliferation of motor neurons                | 2.94E-02 | ISL1                         | 1 |
| Tissue Development                                    | proliferation of genital tubercle             | 2.94E-02 | HOXA13                       | 1 |
| Embryonic Development                                 | proliferation of genital tubercle             | 2.94E-02 | HOXA13                       | 1 |
| Tumor Morphology                                      | production of prostatic intraepithelial tumor | 2.94E-02 | RBL2 (includes EG:100331892) | 1 |

|                                                       |                                             |          |         |   |
|-------------------------------------------------------|---------------------------------------------|----------|---------|---|
| Embryonic Development                                 | polarization of epithelial bud              | 2.94E-02 | FOXF2   | 1 |
| Embryonic Development                                 | patterning of rhombencephalon               | 2.94E-02 | ALDH1A1 | 1 |
| Organ Development                                     | patterning of rhombencephalon               | 2.94E-02 | ALDH1A1 | 1 |
| Nervous System Development and Function               | patterning of rhombencephalon               | 2.94E-02 | ALDH1A1 | 1 |
| Cellular Compromise                                   | oxidative stress response of cardiomyocytes | 2.94E-02 | INSR    | 1 |
| Energy Production                                     | oxidation of pyruvic acid                   | 2.94E-02 | SLC27A1 | 1 |
| Small Molecule Biochemistry                           | oxidation of acetaldehyde                   | 2.94E-02 | ALDH1A1 | 1 |
| Energy Production                                     | oxidation of acetaldehyde                   | 2.94E-02 | ALDH1A1 | 1 |
| Lipid Metabolism                                      | oxidation of 4-androstene-3,17-dione        | 2.94E-02 | HSD17B2 | 1 |
| Small Molecule Biochemistry                           | oxidation of 4-androstene-3,17-dione        | 2.94E-02 | HSD17B2 | 1 |
| Endocrine System Development and Function             | oxidation of 4-androstene-3,17-dione        | 2.94E-02 | HSD17B2 | 1 |
| Energy Production                                     | oxidation of 4-androstene-3,17-dione        | 2.94E-02 | HSD17B2 | 1 |
| Nervous System Development and Function               | outgrowth of motor axons                    | 2.94E-02 | PTN     | 1 |
| Cell Morphology                                       | outgrowth of motor axons                    | 2.94E-02 | PTN     | 1 |
| Cellular Assembly and Organization                    | outgrowth of motor axons                    | 2.94E-02 | PTN     | 1 |
| Genetic Disorder                                      | oligodactyly                                | 2.94E-02 | HOXA13  | 1 |
| Developmental Disorder                                | oligodactyly                                | 2.94E-02 | HOXA13  | 1 |
| Skeletal and Muscular Disorders                       | oligodactyly                                | 2.94E-02 | HOXA13  | 1 |
| Embryonic Development                                 | morphology of rostral migratory stream      | 2.94E-02 | NCAM1   | 1 |
| Tissue Morphology                                     | morphology of rostral migratory stream      | 2.94E-02 | NCAM1   | 1 |
| Skeletal and Muscular System Development and Function | morphology of axial skeleton                | 2.94E-02 | HOXC8   | 1 |

|                                                             |                                               |          |         |   |
|-------------------------------------------------------------|-----------------------------------------------|----------|---------|---|
| Tissue Development                                          | morphogenesis of somites                      | 2.94E-02 | MEOX2   | 1 |
| Embryonic Development                                       | morphogenesis of somites                      | 2.94E-02 | MEOX2   | 1 |
| Organismal Development                                      | morphogenesis of somites                      | 2.94E-02 | MEOX2   | 1 |
| Tissue Development                                          | morphogenesis of nose                         | 2.94E-02 | STRA6   | 1 |
| Embryonic Development                                       | morphogenesis of nose                         | 2.94E-02 | STRA6   | 1 |
| Organ Development                                           | morphogenesis of nose                         | 2.94E-02 | STRA6   | 1 |
| Organismal Development                                      | morphogenesis of nose                         | 2.94E-02 | STRA6   | 1 |
| Organ Morphology                                            | morphogenesis of nose                         | 2.94E-02 | STRA6   | 1 |
| Respiratory System<br>Development and Function              | morphogenesis of nose                         | 2.94E-02 | STRA6   | 1 |
| Embryonic Development                                       | morphogenesis of leg                          | 2.94E-02 | TBX4    | 1 |
| Organismal Development                                      | morphogenesis of leg                          | 2.94E-02 | TBX4    | 1 |
| Skeletal and Muscular<br>System Development and<br>Function | morphogenesis of leg                          | 2.94E-02 | TBX4    | 1 |
| Cellular Movement                                           | mobilization of neural stem cells             | 2.94E-02 | DLL4    | 1 |
| Cellular Movement                                           | migration of endometrial cancer<br>cell lines | 2.94E-02 | SATB2   | 1 |
| Small Molecule Biochemistry                                 | metabolism of ascorbic acid                   | 2.94E-02 | SLC23A2 | 1 |
| Carbohydrate Metabolism                                     | metabolism of ascorbic acid                   | 2.94E-02 | SLC23A2 | 1 |
| Vitamin and Mineral<br>Metabolism                           | metabolism of ascorbic acid                   | 2.94E-02 | SLC23A2 | 1 |
| Lipid Metabolism                                            | mass of triacylglycerol                       | 2.94E-02 | GPAM    | 1 |
| Small Molecule Biochemistry                                 | mass of triacylglycerol                       | 2.94E-02 | GPAM    | 1 |
| Cellular Function and<br>Maintenance                        | localization of alpha islet cells             | 2.94E-02 | NCAM1   | 1 |
| Cellular Movement                                           | localization of alpha islet cells             | 2.94E-02 | NCAM1   | 1 |

|                                              |                                                       |          |         |   |
|----------------------------------------------|-------------------------------------------------------|----------|---------|---|
| Endocrine System<br>Development and Function | localization of alpha islet cells                     | 2.94E-02 | NCAM1   | 1 |
| Cellular Development                         | lifespan of smooth muscle cells                       | 2.94E-02 | NAMPT   | 1 |
| Behavior                                     | lever press response of mice                          | 2.94E-02 | HOMER1  | 1 |
| Embryonic Development                        | invasion of perioptic<br>mesenchyme                   | 2.94E-02 | ALDH1A1 | 1 |
| Cellular Compromise                          | injury of neuroblastoma cell<br>lines                 | 2.94E-02 | ADM     | 1 |
| Cell-To-Cell Signaling and<br>Interaction    | injury of dopaminergic neurons                        | 2.94E-02 | DLL4    | 1 |
| Cellular Compromise                          | injury of dopaminergic neurons                        | 2.94E-02 | DLL4    | 1 |
| Cardiovascular Disease                       | injury of carotid artery                              | 2.94E-02 | PLAU    | 1 |
| Cell Cycle                                   | initiation of cell cycle<br>progression of BMNC cells | 2.94E-02 | FCGR2B  | 1 |
| Inflammatory Response                        | inflammation of knee joint                            | 2.94E-02 | F2RL1   | 1 |
| Lipid Metabolism                             | incorporation of lignoceric acid                      | 2.94E-02 | SLC27A1 | 1 |
| Small Molecule Biochemistry                  | incorporation of lignoceric acid                      | 2.94E-02 | SLC27A1 | 1 |
| Small Molecule Biochemistry                  | incorporation of acetate                              | 2.94E-02 | SLC27A1 | 1 |
| Developmental Disorder                       | hypoplasia of seminal vesicle                         | 2.94E-02 | HOXA13  | 1 |
| Reproductive System Disease                  | hypoplasia of seminal vesicle                         | 2.94E-02 | HOXA13  | 1 |
| Developmental Disorder                       | hypoplasia of prostatic bud                           | 2.94E-02 | HOXA13  | 1 |
| Neurological Disease                         | hypomyelination of fiber tract                        | 2.94E-02 | ARSA    | 1 |
| Cancer                                       | hyperplasia of cardiomyocytes                         | 2.94E-02 | AGTR1   | 1 |
| Cardiovascular Disease                       | hyperplasia of cardiomyocytes                         | 2.94E-02 | AGTR1   | 1 |
| Skeletal and Muscular<br>Disorders           | hyperplasia of cardiomyocytes                         | 2.94E-02 | AGTR1   | 1 |
| Genetic Disorder                             | hirsutism                                             | 2.94E-02 | ODC1    | 1 |



|                                                |                                          |          |        |   |
|------------------------------------------------|------------------------------------------|----------|--------|---|
| Dermatological Diseases and Conditions         | hirsutism                                | 2.94E-02 | ODC1   | 1 |
| Genetic Disorder                               | hereditary sensory neuropathy type 2     | 2.94E-02 | WNK1   | 1 |
| Neurological Disease                           | hereditary sensory neuropathy type 2     | 2.94E-02 | WNK1   | 1 |
| Organ Morphology                               | healing of heart                         | 2.94E-02 | PLAU   | 1 |
| Cardiovascular System Development and Function | healing of heart                         | 2.94E-02 | PLAU   | 1 |
| Organismal Functions                           | healing of heart                         | 2.94E-02 | PLAU   | 1 |
| Endocrine System Development and Function      | growth of thyroid cells                  | 2.94E-02 | C8orf4 | 1 |
| Cellular Development                           | growth of thyroid cells                  | 2.94E-02 | C8orf4 | 1 |
| Cellular Growth and Proliferation              | growth of thyroid cells                  | 2.94E-02 | C8orf4 | 1 |
| Cellular Development                           | growth of small cell lung cancer cells   | 2.94E-02 | ODC1   | 1 |
| Cellular Growth and Proliferation              | growth of small cell lung cancer cells   | 2.94E-02 | ODC1   | 1 |
| Tissue Development                             | growth of metanephros                    | 2.94E-02 | INSR   | 1 |
| Embryonic Development                          | growth of metanephros                    | 2.94E-02 | INSR   | 1 |
| Cellular Development                           | growth of adrenal carcinoma cells        | 2.94E-02 | HSPG2  | 1 |
| Cellular Growth and Proliferation              | growth of adrenal carcinoma cells        | 2.94E-02 | HSPG2  | 1 |
| Renal and Urological Disease                   | glomerulosclerosis of glomerular capsule | 2.94E-02 | ADM    | 1 |
| Cancer                                         | formation of epidermoid                  | 2.94E-02 | ODC1   | 1 |
| Organismal Injury and Abnormalities            | formation of epidermoid                  | 2.94E-02 | ODC1   | 1 |
| Connective Tissue Disorders                    | fibrosis of pericytes                    | 2.94E-02 | AGTR1  | 1 |
| Organismal Injury and Abnormalities            | fibrosis of pericytes                    | 2.94E-02 | AGTR1  | 1 |
| Tissue Development                             | expansion of neuroepithelium             | 2.94E-02 | HSPG2  | 1 |
| Tissue Morphology                              | expansion of neuroepithelium             | 2.94E-02 | HSPG2  | 1 |

|                                 |                                 |          |         |   |
|---------------------------------|---------------------------------|----------|---------|---|
| Tissue Development              | expansion of Rathke's pouch     | 2.94E-02 | PITX1   | 1 |
| Embryonic Development           | expansion of Rathke's pouch     | 2.94E-02 | PITX1   | 1 |
| Tissue Morphology               | expansion of Rathke's pouch     | 2.94E-02 | PITX1   | 1 |
| Lipid Metabolism                | esterification of palmitic acid | 2.94E-02 | SLC27A1 | 1 |
| Small Molecule Biochemistry     | esterification of palmitic acid | 2.94E-02 | SLC27A1 | 1 |
| Developmental Disorder          | dystrophy of skeletal muscle    | 2.94E-02 | SGCD    | 1 |
| Skeletal and Muscular Disorders | dystrophy of skeletal muscle    | 2.94E-02 | SGCD    | 1 |
| Developmental Disorder          | dystopia of vagina              | 2.94E-02 | HOXA13  | 1 |
| Reproductive System Disease     | dystopia of vagina              | 2.94E-02 | HOXA13  | 1 |
| Developmental Disorder          | dystopia of urethra             | 2.94E-02 | HOXA13  | 1 |
| Renal and Urological Disease    | dystopia of urethra             | 2.94E-02 | HOXA13  | 1 |
| Gastrointestinal Disease        | dystopia of anus                | 2.94E-02 | HOXA13  | 1 |
| Developmental Disorder          | dystopia of anus                | 2.94E-02 | HOXA13  | 1 |
| Genetic Disorder                | diffuse mesangial sclerosis     | 2.94E-02 | BDKRB2  | 1 |
| Renal and Urological Disease    | diffuse mesangial sclerosis     | 2.94E-02 | BDKRB2  | 1 |
| Tissue Development              | differentiation of somites      | 2.94E-02 | MEOX2   | 1 |
| Embryonic Development           | differentiation of somites      | 2.94E-02 | MEOX2   | 1 |
| Cellular Development            | differentiation of somites      | 2.94E-02 | MEOX2   | 1 |
| Tissue Development              | development of urogenital sinus | 2.94E-02 | HOXA13  | 1 |
| Embryonic Development           | development of urogenital sinus | 2.94E-02 | HOXA13  | 1 |
| Organismal Development          | development of urogenital sinus | 2.94E-02 | HOXA13  | 1 |

|                                                             |                                                 |          |        |   |
|-------------------------------------------------------------|-------------------------------------------------|----------|--------|---|
| Reproductive System<br>Development and Function             | development of urogenital sinus                 | 2.94E-02 | HOXA13 | 1 |
| Tissue Development                                          | development of subcommissural<br>organ          | 2.94E-02 | EN1    | 1 |
| Embryonic Development                                       | development of subcommissural<br>organ          | 2.94E-02 | EN1    | 1 |
| Organ Development                                           | development of subcommissural<br>organ          | 2.94E-02 | EN1    | 1 |
| Organismal Development                                      | development of subcommissural<br>organ          | 2.94E-02 | EN1    | 1 |
| Nervous System<br>Development and Function                  | development of subcommissural<br>organ          | 2.94E-02 | EN1    | 1 |
| Tissue Development                                          | development of posterior<br>cerebral commissure | 2.94E-02 | EN1    | 1 |
| Embryonic Development                                       | development of posterior<br>cerebral commissure | 2.94E-02 | EN1    | 1 |
| Organ Development                                           | development of posterior<br>cerebral commissure | 2.94E-02 | EN1    | 1 |
| Organismal Development                                      | development of posterior<br>cerebral commissure | 2.94E-02 | EN1    | 1 |
| Nervous System<br>Development and Function                  | development of posterior<br>cerebral commissure | 2.94E-02 | EN1    | 1 |
| Tissue Development                                          | development of extensor muscle                  | 2.94E-02 | PLAU   | 1 |
| Skeletal and Muscular<br>System Development and<br>Function | development of extensor muscle                  | 2.94E-02 | PLAU   | 1 |
| Tissue Development                                          | development of cranial neural<br>crest          | 2.94E-02 | MSX1   | 1 |
| Embryonic Development                                       | development of cranial neural<br>crest          | 2.94E-02 | MSX1   | 1 |
| Organismal Development                                      | development of cranial neural<br>crest          | 2.94E-02 | MSX1   | 1 |
| Tissue Development                                          | development of choroid plexus                   | 2.94E-02 | EN1    | 1 |
| Embryonic Development                                       | development of choroid plexus                   | 2.94E-02 | EN1    | 1 |
| Organ Development                                           | development of choroid plexus                   | 2.94E-02 | EN1    | 1 |

|                                         |                                                    |          |         |   |
|-----------------------------------------|----------------------------------------------------|----------|---------|---|
| Organismal Development                  | development of choroid plexus                      | 2.94E-02 | EN1     | 1 |
| Nervous System Development and Function | development of choroid plexus                      | 2.94E-02 | EN1     | 1 |
| Tissue Morphology                       | destruction of endothelial tissue                  | 2.94E-02 | FCGR2B  | 1 |
| Small Molecule Biochemistry             | depletion of spermidine                            | 2.94E-02 | ODC1    | 1 |
| Molecular Transport                     | depletion of spermidine                            | 2.94E-02 | ODC1    | 1 |
| Tissue Development                      | delay in modification of organ                     | 2.94E-02 | HSD17B2 | 1 |
| Organ Morphology                        | delay in modification of organ                     | 2.94E-02 | HSD17B2 | 1 |
| Tissue Morphology                       | degeneration of heart tissue                       | 2.94E-02 | SGCD    | 1 |
| Tissue Morphology                       | degeneration of cardiac muscle                     | 2.94E-02 | SGCD    | 1 |
| Skeletal and Muscular Disorders         | degeneration of cardiac muscle                     | 2.94E-02 | SGCD    | 1 |
| Organismal Injury and Abnormalities     | degeneration of cardiac muscle                     | 2.94E-02 | SGCD    | 1 |
| Developmental Disorder                  | dedifferentiation of mononuclear cells             | 2.94E-02 | MSX1    | 1 |
| Hematological Disease                   | dedifferentiation of mononuclear cells             | 2.94E-02 | MSX1    | 1 |
| Immunological Disease                   | dedifferentiation of mononuclear cells             | 2.94E-02 | MSX1    | 1 |
| Tissue Morphology                       | damage of skeletal muscle                          | 2.94E-02 | SGCD    | 1 |
| Skeletal and Muscular Disorders         | damage of skeletal muscle                          | 2.94E-02 | SGCD    | 1 |
| Organismal Injury and Abnormalities     | damage of skeletal muscle                          | 2.94E-02 | SGCD    | 1 |
| Gastrointestinal Disease                | damage of salivary gland                           | 2.94E-02 | CBLB    | 1 |
| Organismal Injury and Abnormalities     | damage of salivary gland                           | 2.94E-02 | CBLB    | 1 |
| Lipid Metabolism                        | conversion of phosphatidylinositol 3,4-diphosphate | 2.94E-02 | FCGR2B  | 1 |

|                                                       |                                                    |          |         |   |
|-------------------------------------------------------|----------------------------------------------------|----------|---------|---|
| Small Molecule Biochemistry                           | conversion of phosphatidylinositol 3,4-diphosphate | 2.94E-02 | FCGR2B  | 1 |
| Carbohydrate Metabolism                               | conversion of phosphatidylinositol 3,4-diphosphate | 2.94E-02 | FCGR2B  | 1 |
| Skeletal and Muscular System Development and Function | contraction of myoid cells                         | 2.94E-02 | ADM     | 1 |
| Reproductive System Development and Function          | contraction of myoid cells                         | 2.94E-02 | ADM     | 1 |
| Cell Morphology                                       | contraction of myoid cells                         | 2.94E-02 | ADM     | 1 |
| Skeletal and Muscular System Development and Function | contraction of detrusor muscle                     | 2.94E-02 | CHRM2   | 1 |
| Tissue Morphology                                     | contraction of detrusor muscle                     | 2.94E-02 | CHRM2   | 1 |
| Organ Morphology                                      | contraction of detrusor muscle                     | 2.94E-02 | CHRM2   | 1 |
| Renal and Urological System Development and Function  | contraction of detrusor muscle                     | 2.94E-02 | CHRM2   | 1 |
| Lipid Metabolism                                      | consumption of fat                                 | 2.94E-02 | GAL     | 1 |
| Small Molecule Biochemistry                           | consumption of fat                                 | 2.94E-02 | GAL     | 1 |
| Lipid Metabolism                                      | concentration of retinaldehyde                     | 2.94E-02 | ALDH1A1 | 1 |
| Small Molecule Biochemistry                           | concentration of retinaldehyde                     | 2.94E-02 | ALDH1A1 | 1 |
| Molecular Transport                                   | concentration of retinaldehyde                     | 2.94E-02 | ALDH1A1 | 1 |
| Vitamin and Mineral Metabolism                        | concentration of retinaldehyde                     | 2.94E-02 | ALDH1A1 | 1 |
| Lipid Metabolism                                      | cleavage of acetyl-coenzyme A                      | 2.94E-02 | ACAA2   | 1 |
| Small Molecule Biochemistry                           | cleavage of acetyl-coenzyme A                      | 2.94E-02 | ACAA2   | 1 |
| Nucleic Acid Metabolism                               | cleavage of acetyl-coenzyme A                      | 2.94E-02 | ACAA2   | 1 |
| Cell Morphology                                       | cell spreading of muscle precursor cells           | 2.94E-02 | PLAU    | 1 |

|                                                       |                                     |          |                              |   |
|-------------------------------------------------------|-------------------------------------|----------|------------------------------|---|
| Cellular Assembly and Organization                    | binding of membrane rafts           | 2.94E-02 | NCAM1                        | 1 |
| Post-Translational Modification                       | binding of lipoprotein              | 2.94E-02 | HSPG2                        | 1 |
| Skeletal and Muscular System Development and Function | beat of cardiomyocytes              | 2.94E-02 | CHRM2                        | 1 |
| Cardiovascular System Development and Function        | beat of cardiomyocytes              | 2.94E-02 | CHRM2                        | 1 |
| Cellular Movement                                     | beat of cardiomyocytes              | 2.94E-02 | CHRM2                        | 1 |
| Tissue Development                                    | attachment of radial glial cells    | 2.94E-02 | HSPG2                        | 1 |
| Cell-To-Cell Signaling and Interaction                | attachment of radial glial cells    | 2.94E-02 | HSPG2                        | 1 |
| Reproductive System Disease                           | atrophy of seminiferous tubules     | 2.94E-02 | HSD17B2                      | 1 |
| Organismal Injury and Abnormalities                   | atrophy of seminiferous tubules     | 2.94E-02 | HSD17B2                      | 1 |
| Organ Morphology                                      | atrophy of renal medulla            | 2.94E-02 | AGTR1                        | 1 |
| Organismal Injury and Abnormalities                   | atrophy of renal medulla            | 2.94E-02 | AGTR1                        | 1 |
| Tissue Development                                    | arrest in growth of trophoblast     | 2.94E-02 | F2RL1                        | 1 |
| Embryonic Development                                 | arrest in growth of trophoblast     | 2.94E-02 | F2RL1                        | 1 |
| Organismal Development                                | angiogenesis of microvessel         | 2.94E-02 | RBL2 (includes EG:100331892) | 1 |
| Cardiovascular System Development and Function        | angiogenesis of microvessel         | 2.94E-02 | RBL2 (includes EG:100331892) | 1 |
| Cardiovascular System Development and Function        | angiogenesis of melanoma cell lines | 2.94E-02 | AGTR1                        | 1 |
| Cellular Development                                  | angiogenesis of melanoma cell lines | 2.94E-02 | AGTR1                        | 1 |
| Developmental Disorder                                | agenesis of preputial gland         | 2.94E-02 | HOXA13                       | 1 |
| Developmental Disorder                                | agenesis of coagulating gland       | 2.94E-02 | HOXA13                       | 1 |
| Reproductive System Disease                           | agenesis of coagulating gland       | 2.94E-02 | HOXA13                       | 1 |

|                                        |                                          |          |                         |   |
|----------------------------------------|------------------------------------------|----------|-------------------------|---|
| Tissue Development                     | adhesion of fibroblast-like synoviocytes | 2.94E-02 | ADM                     | 1 |
| Cell-To-Cell Signaling and Interaction | adhesion of fibroblast-like synoviocytes | 2.94E-02 | ADM                     | 1 |
| Small Molecule Biochemistry            | activation of glycosaminoglycan          | 2.94E-02 | HTATIP2                 | 1 |
| Carbohydrate Metabolism                | activation of glycosaminoglycan          | 2.94E-02 | HTATIP2                 | 1 |
| Tissue Development                     | accumulation of skin cancer cell lines   | 2.94E-02 | ZEB2                    | 1 |
| Small Molecule Biochemistry            | accumulation of putrescine               | 2.94E-02 | ODC1                    | 1 |
| Lipid Metabolism                       | accumulation of galactosylceramide       | 2.94E-02 | ARSA                    | 1 |
| Small Molecule Biochemistry            | accumulation of galactosylceramide       | 2.94E-02 | ARSA                    | 1 |
| Molecular Transport                    | accumulation of galactosylceramide       | 2.94E-02 | ARSA                    | 1 |
| Lipid Metabolism                       | accumulation of acyl-coenzyme A          | 2.94E-02 | SLC27A1                 | 1 |
| Small Molecule Biochemistry            | accumulation of acyl-coenzyme A          | 2.94E-02 | SLC27A1                 | 1 |
| Molecular Transport                    | accumulation of acyl-coenzyme A          | 2.94E-02 | SLC27A1                 | 1 |
| Nucleic Acid Metabolism                | accumulation of acyl-coenzyme A          | 2.94E-02 | SLC27A1                 | 1 |
| Genetic Disorder                       | Weill-Marchesani syndrome                | 2.94E-02 | FBN1                    | 1 |
| Developmental Disorder                 | Weill-Marchesani syndrome                | 2.94E-02 | FBN1                    | 1 |
| Skeletal and Muscular Disorders        | Weill-Marchesani syndrome                | 2.94E-02 | FBN1                    | 1 |
| Connective Tissue Disorders            | Weill-Marchesani syndrome                | 2.94E-02 | FBN1                    | 1 |
| Ophthalmic Disease                     | Weill-Marchesani syndrome                | 2.94E-02 | FBN1                    | 1 |
| Tissue Development                     | morphogenesis of heart                   | 2.98E-02 | INSR, ISL1, MSX1, XIRP1 | 4 |
| Embryonic Development                  | morphogenesis of heart                   | 2.98E-02 | INSR, ISL1, MSX1, XIRP1 | 4 |
| Organ Development                      | morphogenesis of heart                   | 2.98E-02 | INSR, ISL1, MSX1, XIRP1 | 4 |
| Organismal Development                 | morphogenesis of heart                   | 2.98E-02 | INSR, ISL1, MSX1, XIRP1 | 4 |

|                                                |                                     |          |                         |   |
|------------------------------------------------|-------------------------------------|----------|-------------------------|---|
| Organ Morphology                               | morphogenesis of heart              | 2.98E-02 | INSR, ISL1, MSX1, XIRP1 | 4 |
| Cardiovascular System Development and Function | morphogenesis of heart              | 2.98E-02 | INSR, ISL1, MSX1, XIRP1 | 4 |
| Reproductive System Development and Function   | proliferation of gonadal cell lines | 3.06E-02 | AGTR1, KCNK2, PLAU      | 3 |
| Cellular Growth and Proliferation              | proliferation of gonadal cell lines | 3.06E-02 | AGTR1, KCNK2, PLAU      | 3 |
| Tissue Development                             | morphogenesis of connective tissue  | 3.06E-02 | EYA1, INSIG2, MSX1      | 3 |
| Cellular Movement                              | invasion of fibroblast cell lines   | 3.06E-02 | FAM105A, ODC1, PLAU     | 3 |
| Lipid Metabolism                               | uptake of long chain fatty acid     | 3.17E-02 | SLC27A1, SLC27A6        | 2 |
| Small Molecule Biochemistry                    | uptake of long chain fatty acid     | 3.17E-02 | SLC27A1, SLC27A6        | 2 |
| Molecular Transport                            | uptake of long chain fatty acid     | 3.17E-02 | SLC27A1, SLC27A6        | 2 |
| Tissue Development                             | thyroid gland development           | 3.17E-02 | EYA1, HOXB3             | 2 |
| Embryonic Development                          | thyroid gland development           | 3.17E-02 | EYA1, HOXB3             | 2 |
| Organ Development                              | thyroid gland development           | 3.17E-02 | EYA1, HOXB3             | 2 |
| Organismal Development                         | thyroid gland development           | 3.17E-02 | EYA1, HOXB3             | 2 |
| Endocrine System Development and Function      | thyroid gland development           | 3.17E-02 | EYA1, HOXB3             | 2 |
| Behavior                                       | short-term memory                   | 3.17E-02 | CHRM2, HOMER1           | 2 |
| Nervous System Development and Function        | short-term memory                   | 3.17E-02 | CHRM2, HOMER1           | 2 |
| Organismal Development                         | morphogenesis of artery             | 3.17E-02 | HOXA13, STRA6           | 2 |
| Cardiovascular System Development and Function | morphogenesis of artery             | 3.17E-02 | HOXA13, STRA6           | 2 |
| Cardiovascular Disease                         | fibrosis of myocardium              | 3.17E-02 | PLAU, SGCD              | 2 |
| Skeletal and Muscular Disorders                | fibrosis of myocardium              | 3.17E-02 | PLAU, SGCD              | 2 |



|                                                |                                    |          |                                               |   |
|------------------------------------------------|------------------------------------|----------|-----------------------------------------------|---|
| Organismal Injury and Abnormalities            | fibrosis of myocardium             | 3.17E-02 | PLAU, SGCD                                    | 2 |
| Genetic Disorder                               | ectodermal dysplasia               | 3.17E-02 | LAMA3, MSX1                                   | 2 |
| Developmental Disorder                         | ectodermal dysplasia               | 3.17E-02 | LAMA3, MSX1                                   | 2 |
| Dermatological Diseases and Conditions         | ectodermal dysplasia               | 3.17E-02 | LAMA3, MSX1                                   | 2 |
| Cell-To-Cell Signaling and Interaction         | desensitization of cells           | 3.17E-02 | ADM, PRSS1/PRSS3                              | 2 |
| Organismal Development                         | density of capillary vessel        | 3.17E-02 | HOXB3, MEOX2                                  | 2 |
| Tissue Morphology                              | density of capillary vessel        | 3.17E-02 | HOXB3, MEOX2                                  | 2 |
| Cardiovascular System Development and Function | density of capillary vessel        | 3.17E-02 | HOXB3, MEOX2                                  | 2 |
| Small Molecule Biochemistry                    | clearance of D-glucose             | 3.17E-02 | CPE (includes EG:12876), GNAZ                 | 2 |
| Molecular Transport                            | clearance of D-glucose             | 3.17E-02 | CPE (includes EG:12876), GNAZ                 | 2 |
| Carbohydrate Metabolism                        | clearance of D-glucose             | 3.17E-02 | CPE (includes EG:12876), GNAZ                 | 2 |
| Behavior                                       | cognition                          | 3.19E-02 | ARSA, GAL, PLAU, PRKAR2B, PTN, SHROOM4, STRA6 | 7 |
| Lipid Metabolism                               | hydrolysis of phosphatidylinositol | 3.22E-02 | BDKRB2, CHRM2, F2RL1, HTR2A                   | 4 |
| Small Molecule Biochemistry                    | hydrolysis of phosphatidylinositol | 3.22E-02 | BDKRB2, CHRM2, F2RL1, HTR2A                   | 4 |
| Carbohydrate Metabolism                        | hydrolysis of phosphatidylinositol | 3.22E-02 | BDKRB2, CHRM2, F2RL1, HTR2A                   | 4 |
| Organismal Development                         | dilation of artery                 | 3.23E-02 | ADM, KCNK2, PLAU                              | 3 |
| Tissue Morphology                              | dilation of artery                 | 3.23E-02 | ADM, KCNK2, PLAU                              | 3 |
| Cardiovascular System Development and Function | dilation of artery                 | 3.23E-02 | ADM, KCNK2, PLAU                              | 3 |
| Tissue Development                             | development of genital organ       | 3.23E-02 | FOXF2, HOXA13, STRA6                          | 3 |
| Embryonic Development                          | development of genital organ       | 3.23E-02 | FOXF2, HOXA13, STRA6                          | 3 |
| Organ Development                              | development of genital organ       | 3.23E-02 | FOXF2, HOXA13, STRA6                          | 3 |
| Organismal Development                         | development of genital organ       | 3.23E-02 | FOXF2, HOXA13, STRA6                          | 3 |

|                                              |                                     |          |                                                                                                                                                                                          |    |
|----------------------------------------------|-------------------------------------|----------|------------------------------------------------------------------------------------------------------------------------------------------------------------------------------------------|----|
| Reproductive System Development and Function | development of genital organ        | 3.23E-02 | FOXF2, HOXA13, STRA6                                                                                                                                                                     | 3  |
| Tissue Development                           | adhesion of connective tissue cells | 3.31E-02 | ADM, LAMA3, LTBP2, PLAU, POSTN                                                                                                                                                           | 5  |
| Cell-To-Cell Signaling and Interaction       | adhesion of connective tissue cells | 3.31E-02 | ADM, LAMA3, LTBP2, PLAU, POSTN                                                                                                                                                           | 5  |
| Small Molecule Biochemistry                  | uptake of 2-deoxyglucose            | 3.48E-02 | CXCL14, GPAM, INSR, SLC27A1                                                                                                                                                              | 4  |
| Molecular Transport                          | uptake of 2-deoxyglucose            | 3.48E-02 | CXCL14, GPAM, INSR, SLC27A1                                                                                                                                                              | 4  |
| Carbohydrate Metabolism                      | uptake of 2-deoxyglucose            | 3.48E-02 | CXCL14, GPAM, INSR, SLC27A1                                                                                                                                                              | 4  |
| Genetic Disorder                             | mental retardation                  | 3.48E-02 | AUTS2, MBD5, OPHN1, SHROOM4                                                                                                                                                              | 4  |
| Neurological Disease                         | mental retardation                  | 3.48E-02 | AUTS2, MBD5, OPHN1, SHROOM4                                                                                                                                                              | 4  |
| Developmental Disorder                       | mental retardation                  | 3.48E-02 | AUTS2, MBD5, OPHN1, SHROOM4                                                                                                                                                              | 4  |
| Cardiovascular Disease                       | fibrosis of heart                   | 3.48E-02 | AGTR1, PLAU, POSTN, SGCD                                                                                                                                                                 | 4  |
| Organismal Injury and Abnormalities          | fibrosis of heart                   | 3.48E-02 | AGTR1, PLAU, POSTN, SGCD                                                                                                                                                                 | 4  |
| Gastrointestinal Disease                     | gastrointestinal tract cancer       | 3.48E-02 | B3GNT6, CAPG, CLDN7, EMP1, EN1, FOXF1, FOXF2, H2AFY, HMGA2, HSD17B2, KCNK2, KDM5A, LAMA3, MLH3 (includes EG:217716), MSX1, MXI1, NAMPT, NBR2, NLRP1, NRN1, ODC1, PAPP, PEAK1, PLAU, TBX4 | 25 |
| Cancer                                       | gastrointestinal tract cancer       | 3.48E-02 | B3GNT6, CAPG, CLDN7, EMP1, EN1, FOXF1, FOXF2, H2AFY, HMGA2, HSD17B2, KCNK2, KDM5A, LAMA3, MLH3 (includes EG:217716), MSX1, MXI1, NAMPT, NBR2, NLRP1, NRN1, ODC1, PAPP, PEAK1, PLAU, TBX4 | 25 |
| Genetic Disorder                             | familial Alzheimer's disease        | 3.49E-02 | PLAU, SORL1                                                                                                                                                                              | 2  |
| Neurological Disease                         | familial Alzheimer's disease        | 3.49E-02 | PLAU, SORL1                                                                                                                                                                              | 2  |
| Cellular Movement                            | chemotaxis of epithelial cell lines | 3.49E-02 | AGTR1, PLAU                                                                                                                                                                              | 2  |
| Hair and Skin Development and Function       | chemotaxis of epithelial cell lines | 3.49E-02 | AGTR1, PLAU                                                                                                                                                                              | 2  |
| Embryonic Development                        | chemotaxis of embryonic cell lines  | 3.49E-02 | AGTR1, PLAU                                                                                                                                                                              | 2  |
| Cellular Movement                            | chemotaxis of embryonic cell lines  | 3.49E-02 | AGTR1, PLAU                                                                                                                                                                              | 2  |
| Cancer                                       | uterine cancer                      | 3.51E-02 | ADAMTS5, ADARB1, ALDH1A1, ARSE, ASB5, CXCL14, DYRK2, FBN1, H2AFY, MFAP3L, NLRP1, ODC1, PDK4, SATB2, SMG1, SNCAIP                                                                         | 16 |
| Reproductive System Disease                  | uterine cancer                      | 3.51E-02 | ADAMTS5, ADARB1, ALDH1A1, ARSE, ASB5, CXCL14, DYRK2, FBN1, H2AFY, MFAP3L, NLRP1, ODC1, PDK4, SATB2, SMG1, SNCAIP                                                                         | 16 |

|                                                       |                               |          |                                                                                                              |    |
|-------------------------------------------------------|-------------------------------|----------|--------------------------------------------------------------------------------------------------------------|----|
| Carbohydrate Metabolism                               | metabolism of carbohydrate    | 3.55E-02 | AGTR1, ALDOC, CHRM2, CPS1, DYRK2, FCGR2B, FIG4, GAL, GK, GPAM, HS3ST3B1, HTR2A, INSR, PLAU, SLC23A2, SLC27A1 | 16 |
| Cardiovascular Disease                                | vascular lesion               | 3.56E-02 | ADM, AGTR1, FBN1, HSPG2, PAPP, PLAU                                                                          | 6  |
| Neurological Disease                                  | sedation                      | 3.59E-02 | CHRM2, HTR2A, RBL2 (includes EG:100331892)                                                                   | 3  |
| Organismal Development                                | morphogenesis of blood vessel | 3.59E-02 | HOXA13, HOXB3, STRA6                                                                                         | 3  |
| Cardiovascular System Development and Function        | morphogenesis of blood vessel | 3.59E-02 | HOXA13, HOXB3, STRA6                                                                                         | 3  |
| Tissue Development                                    | formation of muscle cells     | 3.59E-02 | PAPP, PLAU, TRPC6                                                                                            | 3  |
| Skeletal and Muscular System Development and Function | formation of muscle cells     | 3.59E-02 | PAPP, PLAU, TRPC6                                                                                            | 3  |
| Cellular Development                                  | formation of muscle cells     | 3.59E-02 | PAPP, PLAU, TRPC6                                                                                            | 3  |
| Cellular Growth and Proliferation                     | formation of muscle cells     | 3.59E-02 | PAPP, PLAU, TRPC6                                                                                            | 3  |
| Molecular Transport                                   | localization of protein       | 3.65E-02 | ADM, AKAP7, HSPG2, KIFAP3, LRP4, MLH3 (includes EG:217716), MYCBP2                                           | 7  |
| Protein Synthesis                                     | localization of protein       | 3.65E-02 | ADM, AKAP7, HSPG2, KIFAP3, LRP4, MLH3 (includes EG:217716), MYCBP2                                           | 7  |
| Protein Trafficking                                   | localization of protein       | 3.65E-02 | ADM, AKAP7, HSPG2, KIFAP3, LRP4, MLH3 (includes EG:217716), MYCBP2                                           | 7  |
